# Supplementary material for: Endothelial SOCS3 maintains homeostasis and promotes survival in endotoxemic mice
Source: bioRxiv or medRxiv preprint supplement (doi:10.1101/2020.12.28.424586), 2021-06-11
Supplement: Supplementary file [file media-1.pdf]

## Supplemental methods

### Unbiased clustering and principal component analysis of mouse gene expression data

Graphs from mouse data for unsupervised clustering, principal component analysis and cross-correlation heatmaps with missing data were generated in R V4.0.2 following the workflow described below. The complete datasets ("All data.csv" and "Log2fold\_data.csv" are provided on Supplemental Tables 6 and 7, respectively.

```
library(missMDA)
library(VIM)
library(FactoMineR)
library(factoextra)
library(pheatmap)

#load the cormat file to get the correlation matrix function
source("http://www.sthda.com/upload/rquery_cormat.r")

alldata <- read.csv ("All data.csv",stringsAsFactor=FALSE)
rownames (alldata) <- alldata[,1]
numdata <- alldata[,c(11,12,18:38,40:166)]
group <- alldata[, 5]

nb <- estim_ncpPCA(numdata,method.cv = "Kfold", verbose = FALSE)

res.comp <- imputePCA(numdata, ncp = nb$ncp)
res.comp$completeObs

imp <- cbind.data.frame(res.comp$completeObs,group)
res.pca <- PCA(imp, quali.sup = 151, ncp = nb$ncp, graph=FALSE)

pdf("plots.pdf")
plot(res.pca, hab=151, lab="quali") # colors by group
fviz_pca_ind(res.pca, habillage=151, legend.title = "Groups", palette="lancet", repel = TRUE,
geom = "point") # colors by group

# 30 most important variables colored by contribution
fviz_pca_var(res.pca, repel = TRUE, select.var = list(cos2 = 30), col.var = "contrib",
gradient.cols = c("#00AFBB", "#E7B800", "#FC4E07"))

contribs <- res.pca$var$contrib[,1:2]
contribs <- contribs[order(contribs[,1],decreasing=TRUE),]

rquery.cormat(numdata, graphType="heatmap")
corrmatrix<-rquery.cormat(numdata, type="flatten", graph=FALSE)
write.table (corrmatrix$r, file = "corrmatrix.txt", append = FALSE, quote = FALSE, sep = "\t",
eol = "\n", na = "NA", dec = ".", row.names = TRUE, col.names = TRUE)

LPS_numdata <- imp[grep("LPS", imp$group), ]
LPS_numdata <- LPS_numdata[,1:148]

rquery.cormat(LPS_numdata, graphType="heatmap")
LPS_corrmatrix<-rquery.cormat(LPS_numdata, type="flatten", graph=FALSE)
write.table (LPS_corrmatrix$r, file = "LPS_corrmatrix.txt", append = FALSE, quote = FALSE, sep =
"\t", eol = "\n", na = "NA", dec = ".", row.names = TRUE, col.names = TRUE)

logdata <- read.csv ("Log2fold_data.csv")
numlogdata <- logdata [,6:132]
rownames(numlogdata) <- logdata [,1]
head (numlogdata)

numdata_scale = scale(numlogdata)
pheatmap(numdata_scale,main = "pheatmap default", na_col="gray")

dev.off()
```

## **Gel Electrophoresis and Immunoblotting**

Confluent HUVEC were lysed in Laemmli buffer containing the following protease and phosphatase inhibitors: cOMplete protease inhibitor mixture, PhosSTOP phosphatase inhibitor mixture, 0.1 M NaF, 0.1 mM phenyl arsine oxide, 10 mM pyrophosphate and 0.1 mM pervanadate. After boiling, a total of 15  $\mu$ l of cell lysate per lane was loaded on standard SDS-PAGE gels and transferred to nitrocellulose membranes. Immunoblots were performed by blocking the membranes with 5% nonfat dry milk or 5% BSA in PBS/Tween and incubating overnight at 4°C with respective primary antibodies. Secondary HRP-conjugated anti-mouse, anti-rabbit, or anti-goat antibodies were incubated for 1 h at room temperature. Membranes were developed via chemiluminescence detected with either a LAS-3000 (Fujifilm) or a Chemidoc MP (Bio-Rad) imaging systems.

## **RNA isolation and RT-qPCR**

RNA isolation from whole organs: Approximately 30-50mg of a target organ was removed and placed into an RNase free 2ml tube containing zirconia/silicone beads and 1ml Trizol reagent. Tissue was homogenized using a Mini-Bead beater-16 (BioSpec) for 1 minute. Homogenate was transferred to a new RNase free tube and the RNA isolation from Trizol was continued as per manufacturer's instructions.

RNA isolation from HUVEC: Confluent monolayers grown in multi-well plates were lysed with Trizol reagent and total RNA was isolated following manufacturer's instructions.

RT-qPCR: 400 ng of total RNA were used to prepare cDNA using Primescript RT Master Mix at 42°C following manufacturer's instructions. cDNA was diluted 10-fold in nuclease-free water, and then, 2 $\mu$ L of cDNA were used per PCR reaction. qPCR was performed in a StepOnePlus (Applied Biosystems) instrument using SYBR green-based iTaq supermix and 2 pmol primers (Thermo Fisher). Fold induction was calculated using the  $\Delta\Delta$ Ct method using GAPDH as housekeeping gene (HUVEC) or HPRT (mouse RNA).

## **Lung histological scoring**

5  $\mu$ m sections from FFPE lungs were processed for standard H&E and scanned with a Hamamatsu C10730-12 Nanozoomer at 40x. Scans identified only by mouse ID number were scored by a single investigator (A.J.) that remained masked to experimental groups (both treatment and genotype) until all slides were scored. Inflammatory infiltration, intra alveolar and interstitial exudate accumulation, tissue necrosis, septal and alveolar wall thickening, microhemorrhage and thrombosis were all scored in a scale of 1-4 (1 being the least and 4 being the most abnormal); in four different areas identified first with lower and then higher magnification. These magnifications were variably selected by the operator as needed to make the observation based in the dynamic view provided by the software.

## **Immunohistochemistry**

5  $\mu$ m FFPE sections from lung, liver of kidney were processed for colorimetric histochemistry. Briefly, slides were deparaffinated and rehydrated in sequential steps in xylene and ethanol solutions (100%/ 95%/70%). Endogenous peroxidase activity was blocked with 0.5% H<sub>2</sub>O<sub>2</sub>/MeOH for 10 minutes at room temperature (RT) and antigen retrieval (EZ-Retriever System, Biogenex) was done for 15 minutes at 98 C in 10 mM citrate buffer, pH 6 (for F4/80) or

in 1mM EDTA pH 8 (for MPO). Samples were blocked with FBS for 1 hour at room temperature. Primary antibodies were incubated at a dilution of 1:200 (F4/80) or 1:500 (MPO) in PBS overnight at 4 °C. Biotinylated anti-rabbit secondary antibodies 1:500 in PBS were incubated for 1 hour at RT. Then, samples were incubated with avidin/biotin peroxidase (Elite ABC-HRP, Vector) in the dark for 30 minutes at RT and signal was detected with 3,3'-diaminobenzidine (Impact DAB, Vector) and counterstained with hematoxylin prior to dehydration and mounting with VectaMount. Whole slides were scanned with a Hamamatsu C10730-12 Nanozoomer at 40x.

### **Flow cytometry**

Mice were euthanized with an overdose of pentobarbital. The chest cavity was opened, and 100 µl of blood were collected from a nicked aorta into EDTA-containing vials. Lungs were excised, washed several times with PBS, and minced finely with scissors. Then, the minced lungs were transferred to a 50ml conical tube containing 6 ml of pre-warmed collagenase type I/dispase II/DNAse I mix (CDD) and incubated at 37 °C with gentle agitation for 1 hour. Single cell suspensions were obtained after the suspensions were passaged multiple times through 20-gauge cannulas and filtered through a 70 µm mesh. Cells were then spun at 400 g for 8 minutes at 4 °C and resuspended in 3 ml of cold PBS containing 0.1% BSA.

In parallel, bone marrow cells were collected by flushing the right femur with 10ml PBS onto a 70 µm cell strainer and then centrifuged at 6000 rpm for 5 min 4°C. Red blood cells from blood and bone marrow cells were lysed using RBC lysis buffer according to manufacturer's instructions. Live and dead cells from lungs, blood and bone marrow were distinguished using Pacific blue Annexin V Apoptosis Detection kit with 7-AAD. Lung single cell suspensions (300 µl / sample) were then stained with Ly6G-APC-Cy7 to label neutrophils. Cells were then subjected to flow cytometry analysis using a BD FACS symphony. 30,000 events were acquired for each sample and the data was analyzed using FlowJo v10.7.1. Single cells were gated using FSC-H vs FSC-A, dead cells were excluded based on 7AAD-Annexin-V and only live cells were gated for further analysis. Results are expressed as percentage of total cells.

### **Isolation of RNA from spleen CD45+ cells**

Control, SOCS3iEKO or heterozygous mice were treated with tamoxifen to induce Cre activation as described in the main text. Two weeks after, mice were sacrificed to collect spleens. Organs were then washed in PBS. One third of each spleen was transferred into a tube with Trizol to have RNA of total organ isolated later following the Trizol protocol. The remaining portion of each spleen was pressed with a plunger from a 10 cc syringe. Released cells and tissue remains were collected and pushed through 70 µm cell strainers to obtain single cell isolates. Cells were centrifuged at 400g for 8 min at 4 °C. The cell pellet was then resuspended in 1.5 ml ice-cold PBS+0.1%BSA. The cell suspension was incubated with anti-CD45 conjugated Dynabeads M280 streptavidin beads (3 µg ab, 300 µg beads/sample) for 10 minutes at RT under gentle rotation. CD45+ cells were separated using a magnetic separator (Dyna MPC-S) and washed six times with PBS+0.1%BSA. Cells were placed on magnet for 3 minutes, the supernatant was removed and cells were lysed in Trizol reagent. RNA was extracted following a modified protocol. Briefly, 0.1 ml chloroform was added to 0.5 ml of Trizol per sample. After a 2 min incubation, tubes were centrifuged for 15 min at 12,000 g at 4 °C. The

aqueous solution was then recovered, mixed 1:1 with 70% EtOH, and applied to a silica column (RNeasy Plus Micro kit, Qiagen). Then, the columns were washed, and the RNA was eluted following the RNeasy Plus Micro standard protocol. Efficient gene deletion was confirmed by tail snip genotyping as described in the main text.

## **ELISA**

HUVEC cells were cultured in six-well plates at a density of  $7.2 \times 10^5$  cells/well. 14 hours before treatment, the media was reduced to 800  $\mu$ L/well. Cells were then treated with IL6+R or vehicle control (PBS). Culture media was collected after 6 hours and centrifuged at 18,000 g for 10 min at 4 °C. Then, supernatant was aliquoted and stored at -80°C until analysis. The levels of IFN $\alpha$ , IFN $\beta$  and IFN $\gamma$  in culture media were measured using ELISA kits according to the manufacturer's instructions.

## **Gene knockdown**

HUVEC were transfected by plating cells onto multi-well plates containing individual small interference RNA (siRNA) against SOCS3 or a non-targeting control pool complexed with lipofectamine RNAiMAX transfection reagent in suspension and seeded at  $10^5$  cells/cm<sup>2</sup>. Knockdown efficiency was determined by Western blot analysis.



### CD45+ enriched cells vs total spleen

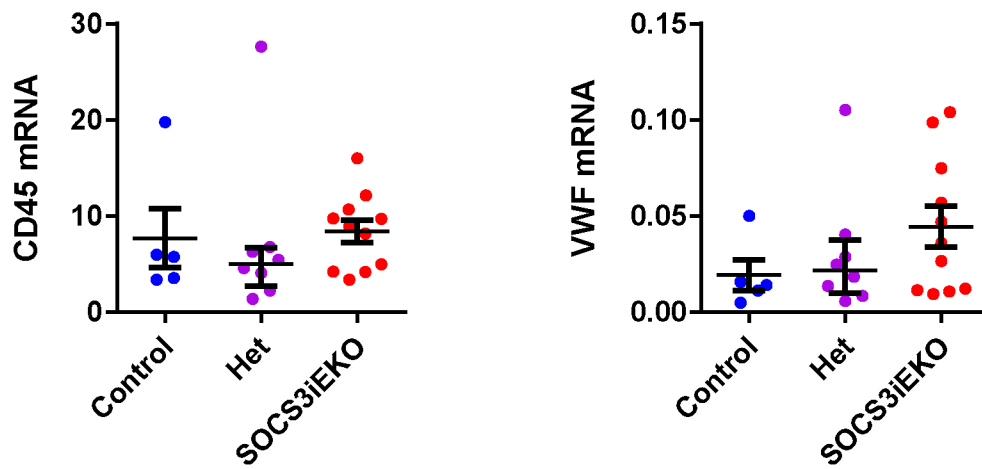

**Supplemental Figure 1. Enrichment of CD45 cells from spleen.** Splensens from control, heterozygous or SOCS3iEKO mice (corresponding to those shown in Figure 1C) were collected 14 days after tamoxifen treatment. CD45 cells were isolated using magnetic beads prior to RNA extraction and RT-qPCR. Enrichment was confirmed by a 5-10-fold increase in CD45 expression and >10-fold decrease in VWF expression compared to total RNA from the same splensens. NS: not statistically significant (Kruskal-Wallis). Data combined from three independent experiments.

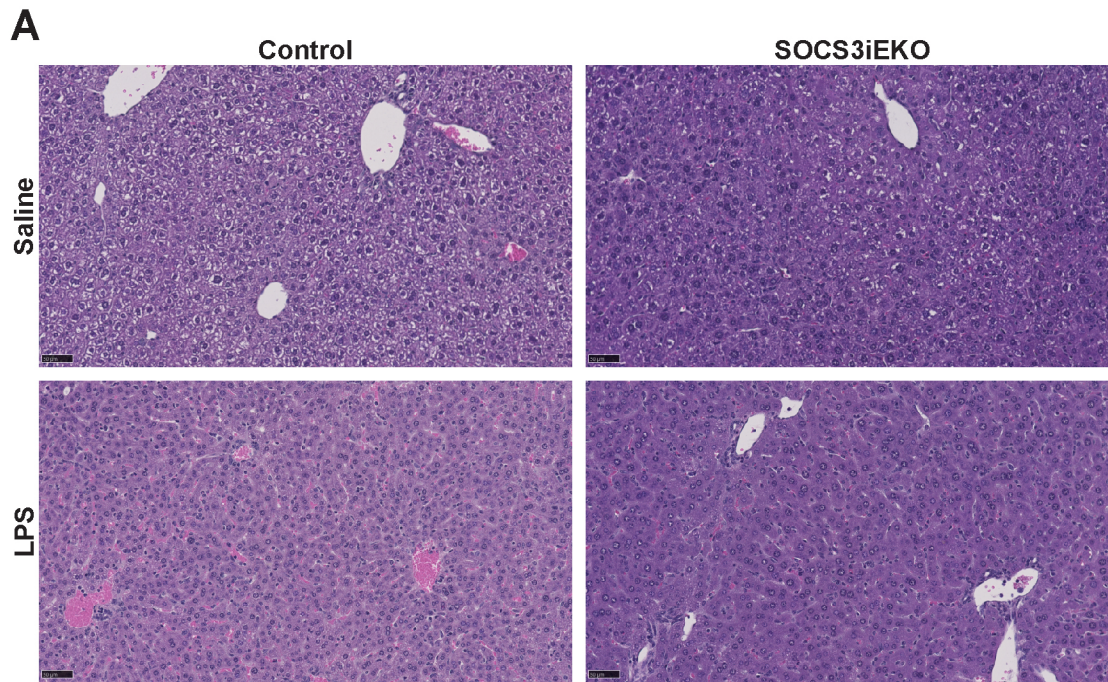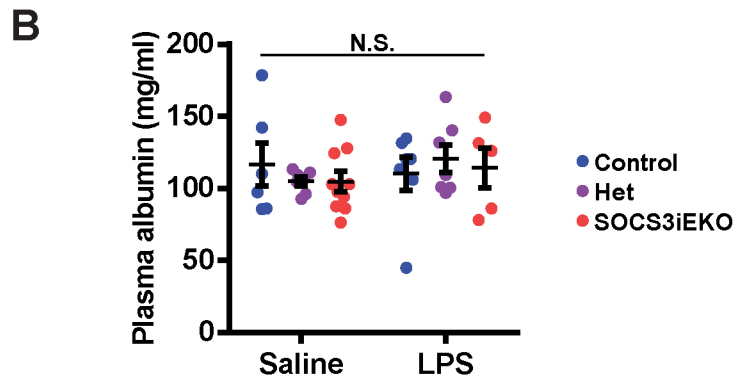

**Supplemental Figure 2. Mild liver dysfunction in endotoxemic SOCS3<sup>iEKO</sup>.** A, H&E staining showing a reduction in glycogen content but no other overt histological features in endotoxemic SOCS3<sup>iEKO</sup> mice. B, Plasma albumin levels remained similar among all experimental groups (two-way ANOVA). Data combined from at least three independent experiments.

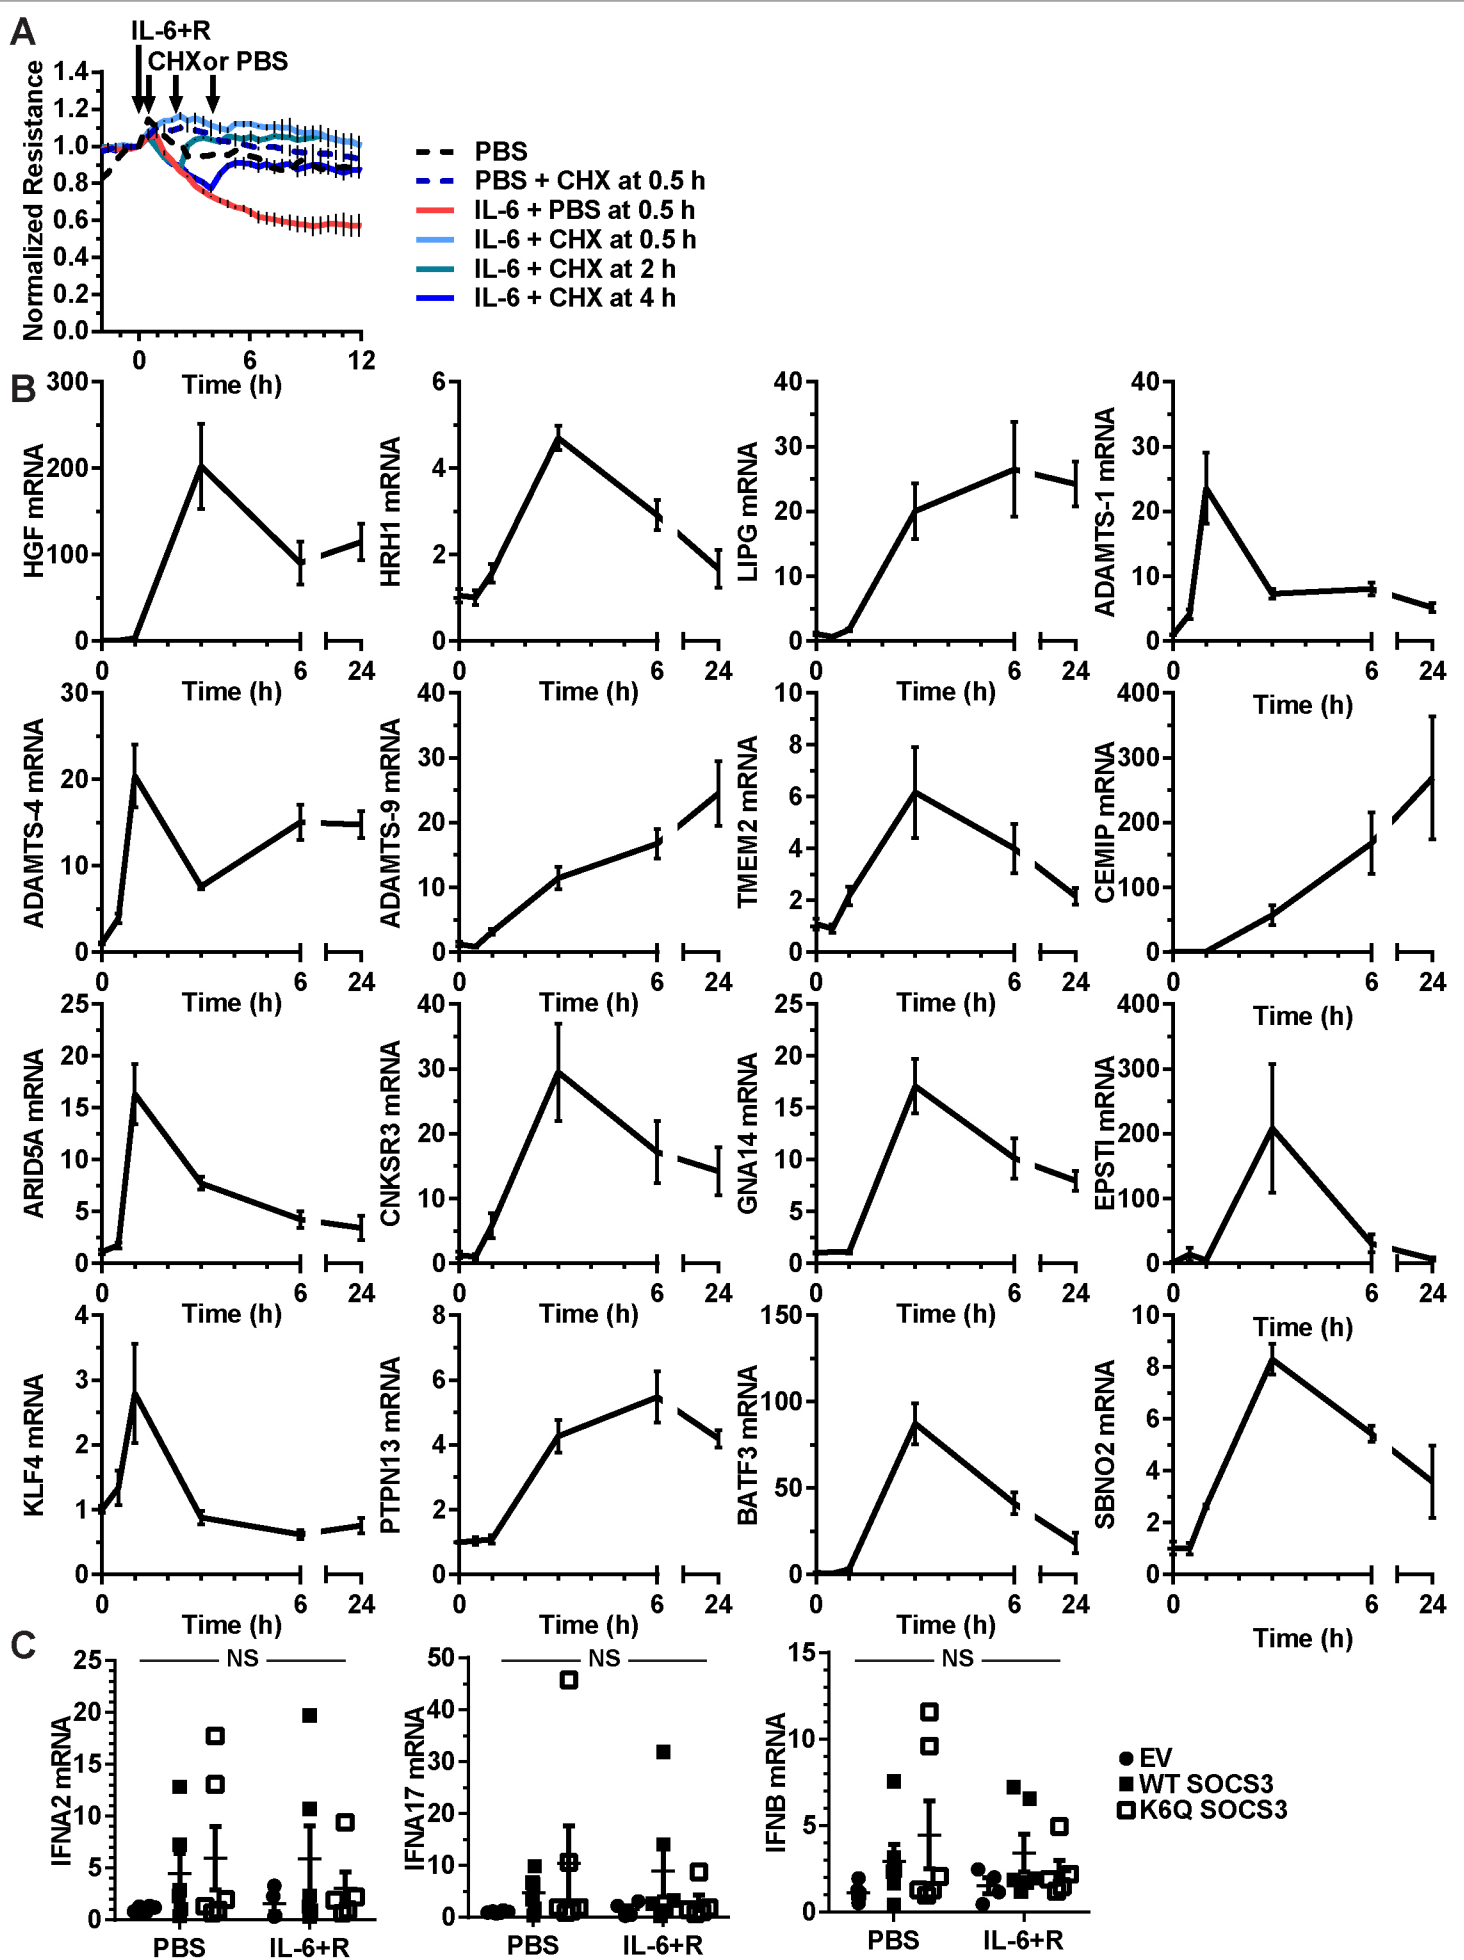

**Supplemental Figure 3. Gene expression changes in HUVEC treated with IL-6+R.** A, IL-6+R-mediated loss of barrier function requires continuous protein synthesis. B, RT-qPCR of IL-6+R-treated HUVEC. Data was obtained as described in Figure 7. Data combined from three independent experiments. C, RT-qPCR of cells treated with or without IL-6+R after infection with lentivirus to overexpress WT SOCS3 or K6Q-SOCS3. An empty vector lentivirus was used as control. Two-way ANOVA. Combined data from three independent experiments performed in duplicate each.

# Cross-correlation analysis - only LPS mice

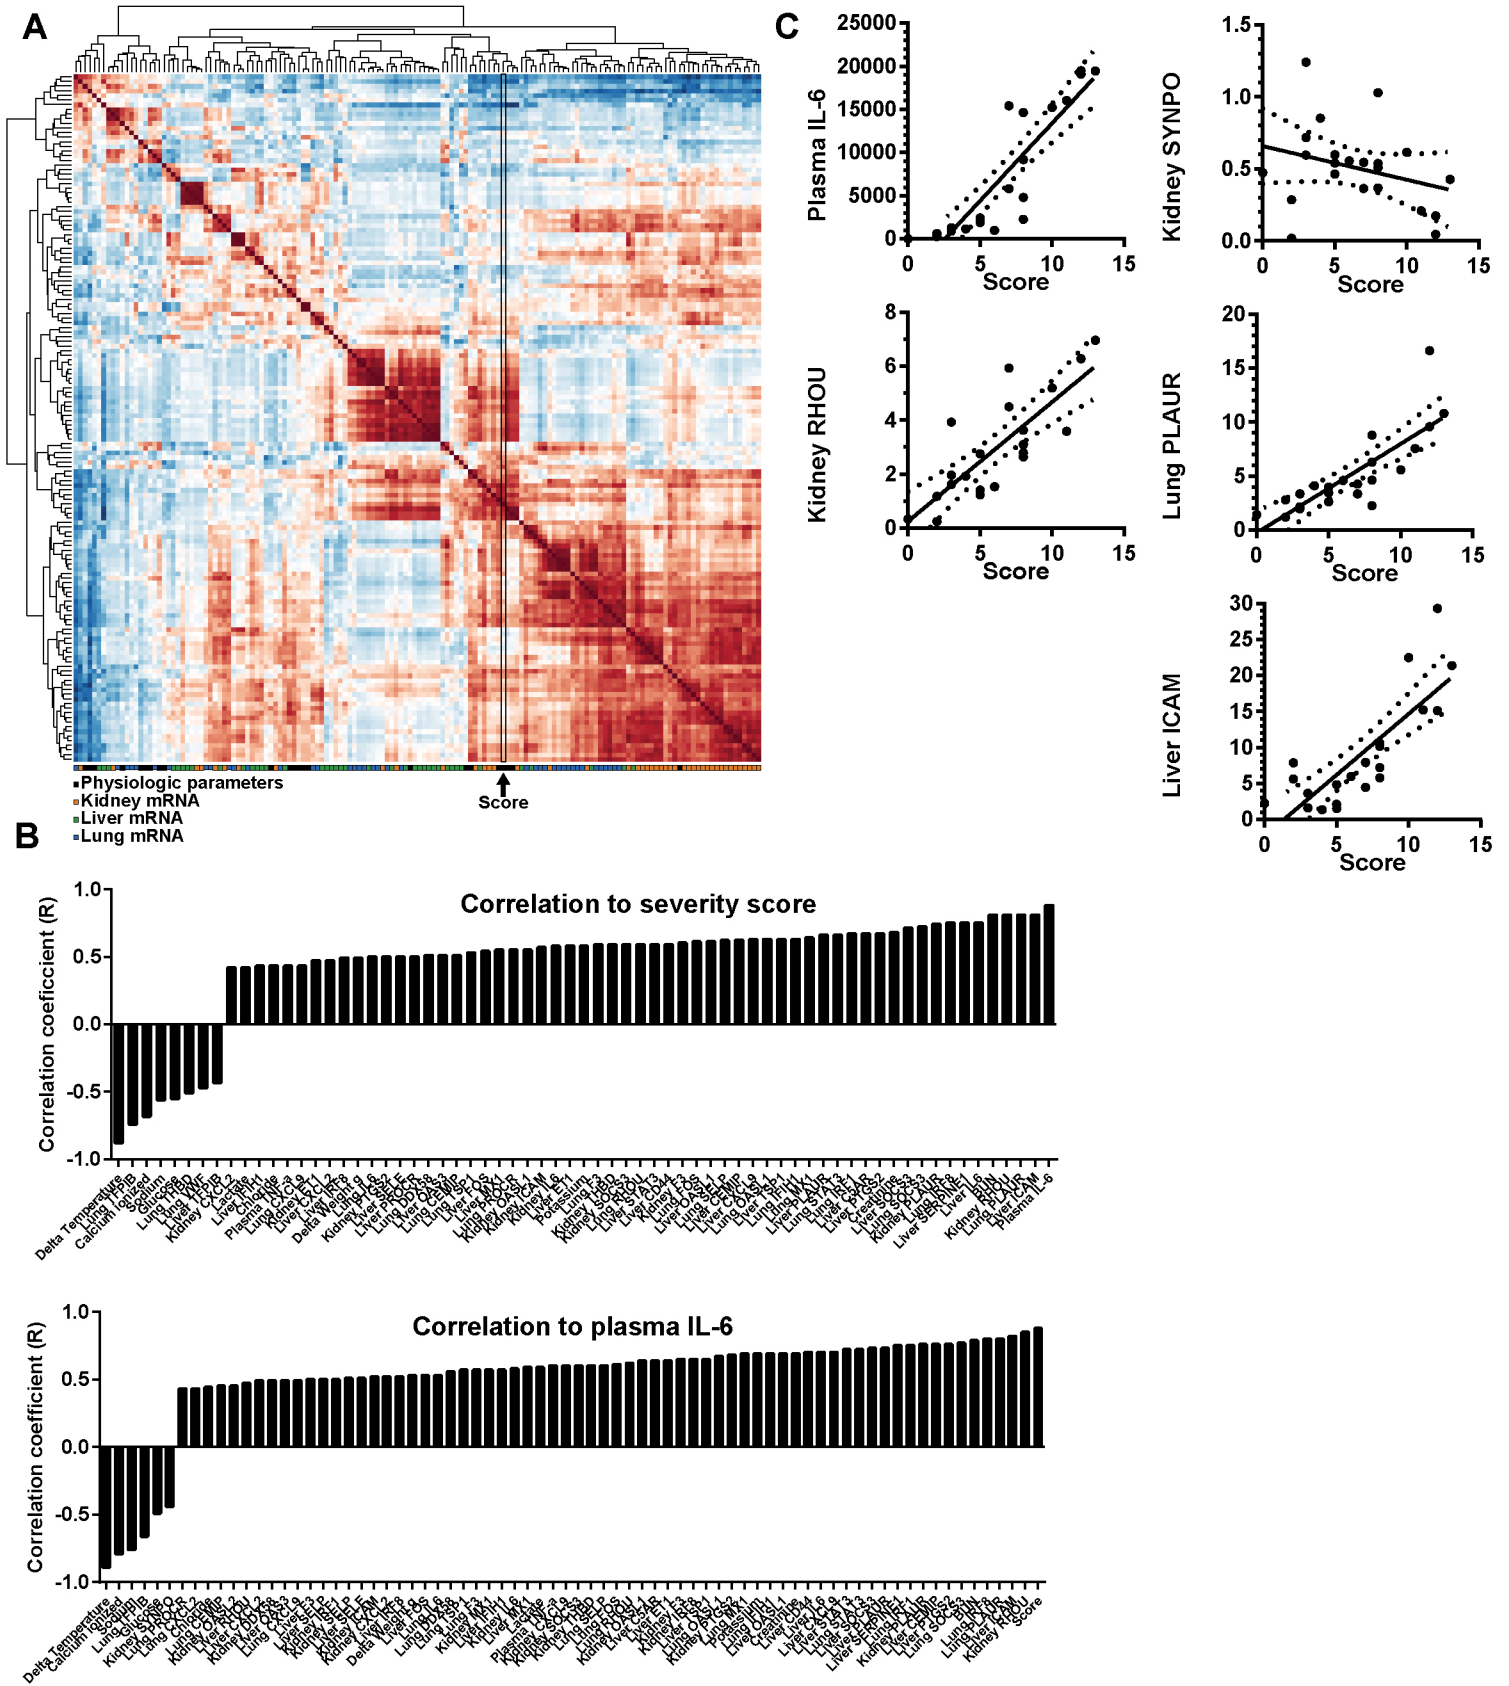

**Supplemental Figure 4. Multiple significant parameters correlate with the severity score and plasma IL-6 levels.** A, Cross-correlation analysis for all parameters measured in LPS-treated mice (full data available as Supplemental Table 6). B, Graph showing all significantly correlated parameters to the severity score or plasma IL-6. C, Examples of the correlation of expression of specific genes (expressed as a base 2 logarithm of fold changes) with the severity score for each mouse. Data combined from three independent experiments.

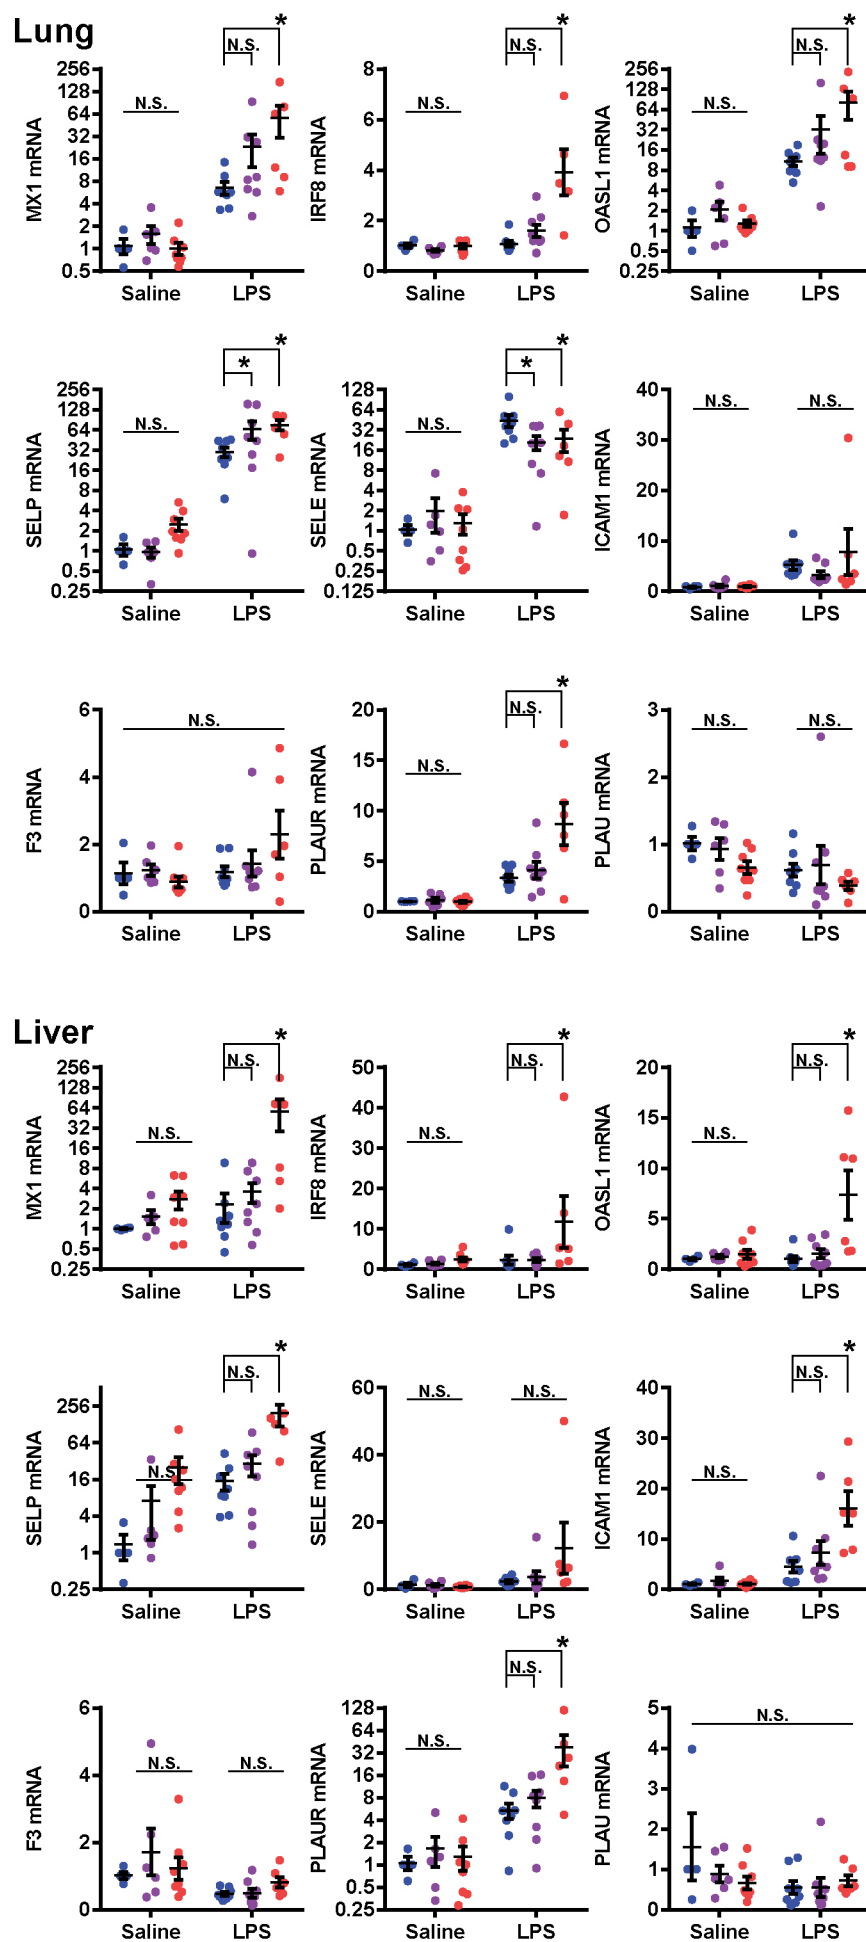

**Supplemental Figure 5. Type I IFN-like, adhesive and prothrombotic gene expression in endotoxemic *SOCS3*<sup>IEKO</sup> mice.** RT-qPCR analysis of whole lung (A) or liver (B) RNA levels. Two-way ANOVA and Holm-Sidak post-hoc tests comparing het and *SOCS3*<sup>IEKO</sup> mice to control within saline or LPS-treated groups. Asterisks denote  $p < 0.05$ . Data combined from at least three independent experiments.



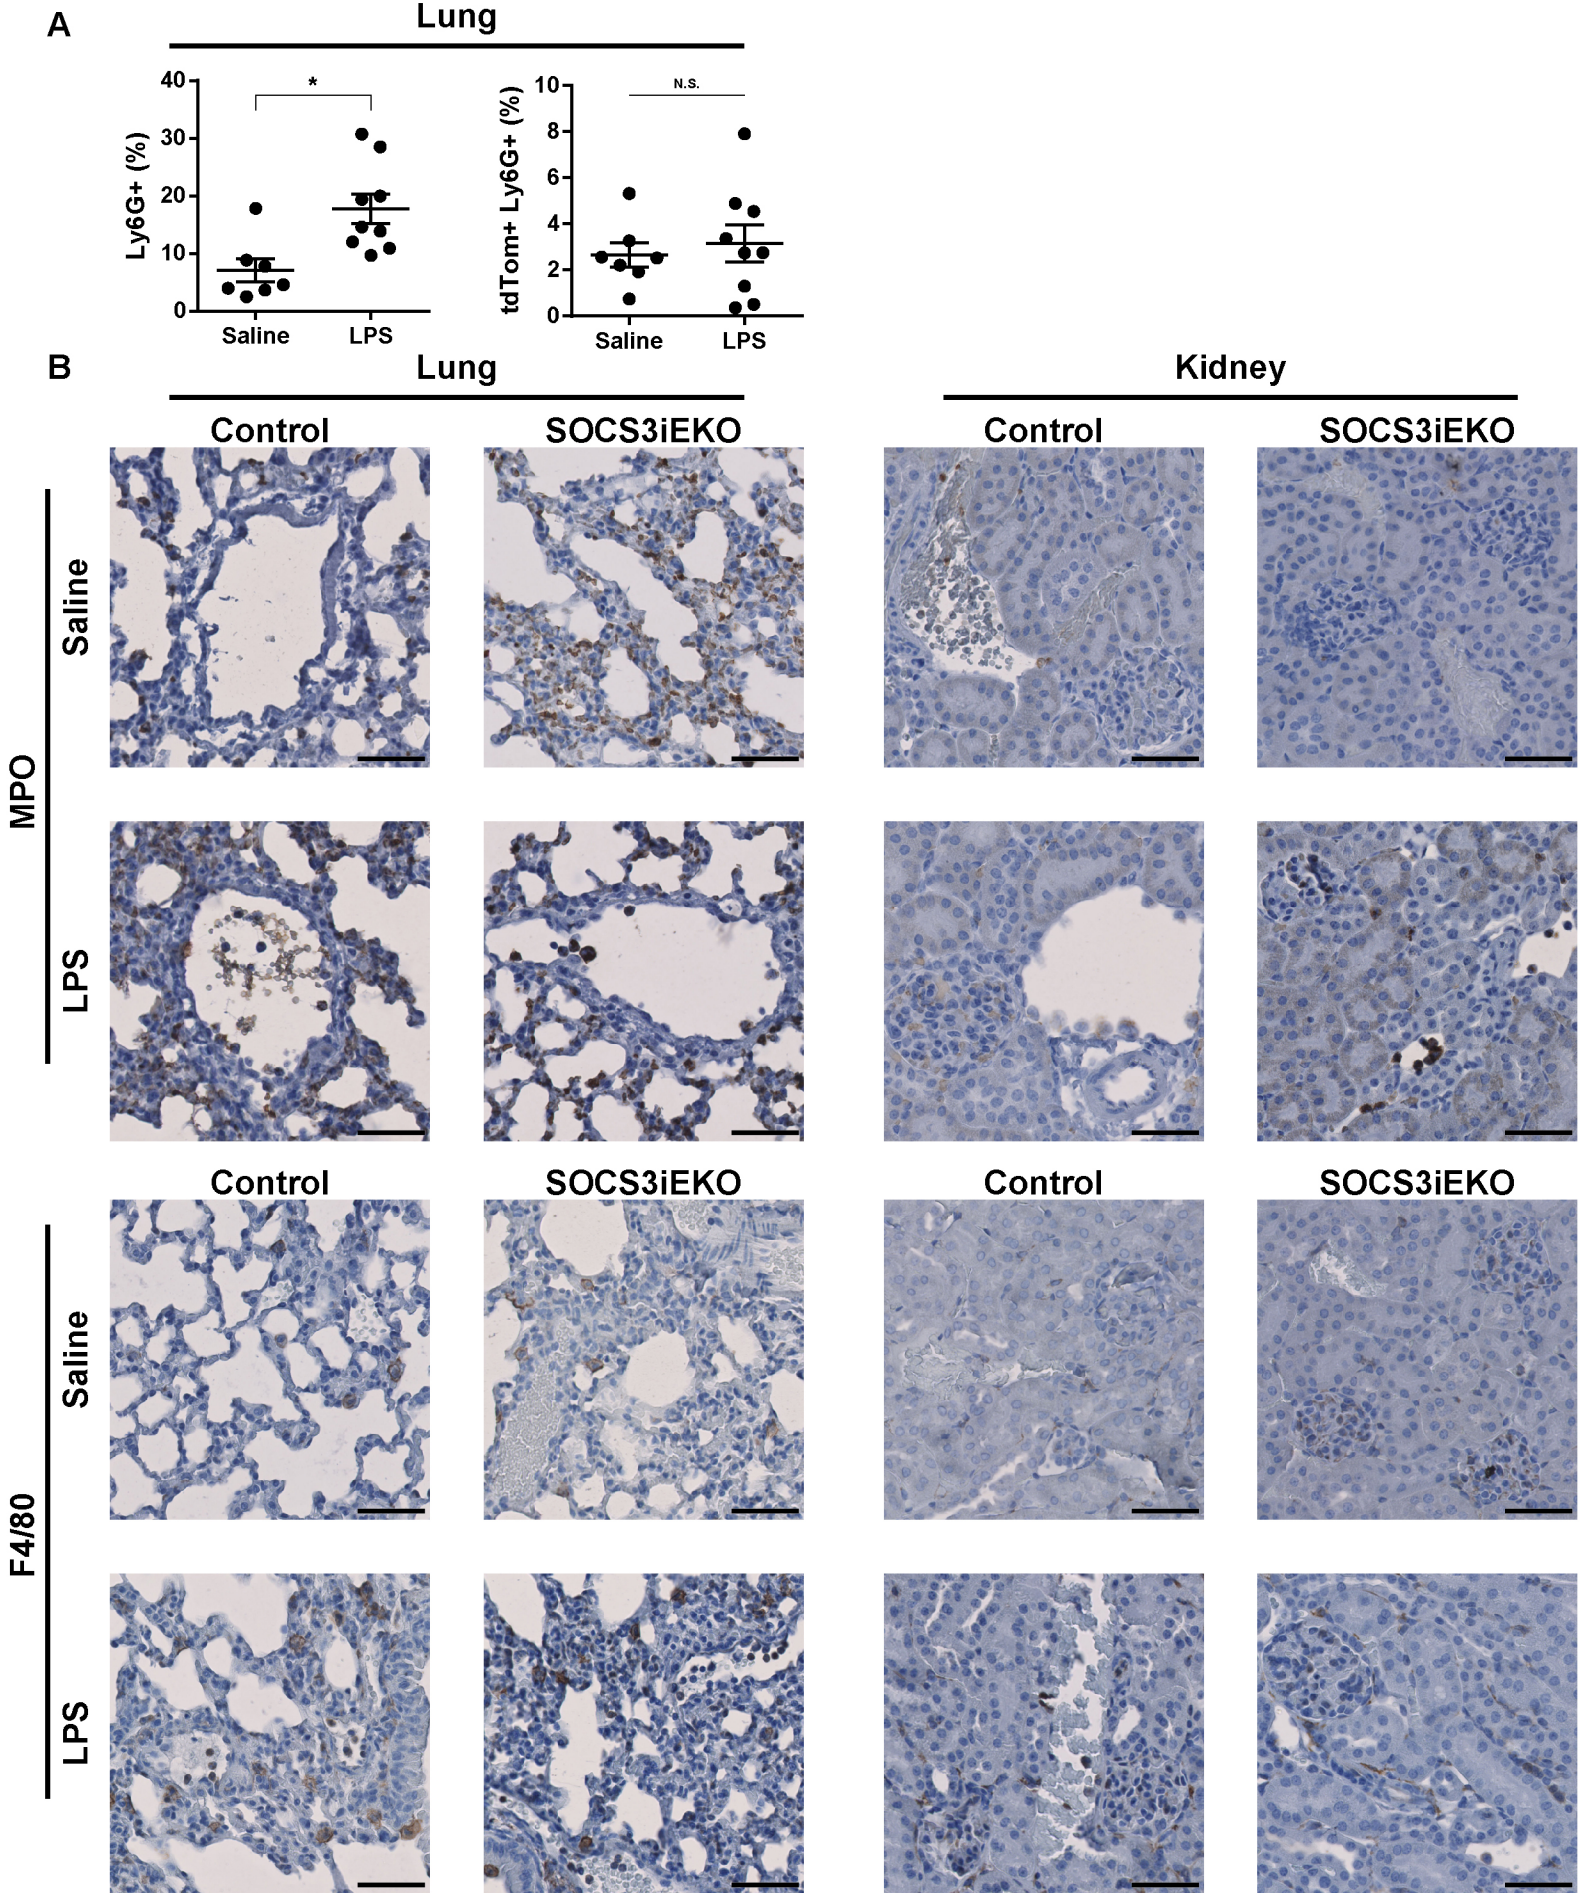

**Supplemental Figure 6. Neutrophil and monocyte infiltration in endotoxemic organs.** A, flow cytometry analysis of Ly6G<sup>+</sup> cells in lungs. Asterisks denote  $p < 0.05$ . Data from two independent experiments ( $n=7$  saline- and  $n=9$  LPS-treated mice). B, Immunohistochemical staining of FFPE sections for myeloperoxidase (MPO, a neutrophil marker) and F4/80 (a monocyte marker) in lungs and kidneys. Bars, 50  $\mu$ m. Images are representative from three independent experiments.

**Supplemental Table 1**

| <b>M&amp;M section</b>                  | <b>Reagent or disposable</b>                                         | <b>Vendor</b>          | <b>Catalog Number</b> |
|-----------------------------------------|----------------------------------------------------------------------|------------------------|-----------------------|
| <b>Mice</b>                             | Lipopolysaccharides from <i>Escherichia coli</i> O111:B4             | Millipore Sigma        | L4391                 |
|                                         | B6.Gt(ROSA)26Sor <sup>tm9(CAG-tdTomato)Hze</sup>                     | The Jackson Laboratory | 07909                 |
|                                         | B6;129S4-Socs3 <sup>tm1Ayo5</sup> /J                                 | The Jackson Laboratory | 010944                |
|                                         | Goldenrod 5 mm lancet                                                | Laboratory Medipoint   | 5mm                   |
|                                         | EDTA Vacutainer tube                                                 | BD                     | 367836                |
|                                         | Lithium Heparin Capillary Blood Collection Tube                      | Sarstedt               | 20.1292.100           |
| <b>Blood measurements</b>               | Element POC Test Card with BUN                                       | Heska                  | 5424                  |
|                                         | IL-6 ELISA                                                           | Proteintech            | KE10007               |
|                                         | TNF- $\alpha$ ELISA                                                  | Proteintech            | KE10002               |
|                                         | BCP Albumin Assay Kit                                                | Abcam                  | AB272526              |
|                                         | Mouse serum albumin                                                  | Millipore Sigma        | A3139                 |
| <b>Glomerular Filtration Rate</b>       | Transdermal Mini GFR Monitor                                         | MediBeacon             | TDM-MD004             |
|                                         | FITC-Sinistrin                                                       | MediBeacon             | FTC-FS001             |
| <b>Assessment of Vascular Leak</b>      | FITC-labeled 70 kDa dextran                                          | Invitrogen             | D1822                 |
|                                         | Alexa Fluor 647-labeled 10 kDa dextran                               | Invitrogen             | D22914                |
|                                         | sucrose                                                              | VWR                    | 97061-426             |
|                                         | Polyvinyl-pyrrolidone (avg MW 40 kDa)                                | Millipore Sigma        | PVP-40                |
|                                         | Ethylene Glycol                                                      | VWR                    | 97061-964             |
|                                         | Tissue-Tek optimum cutting temperature                               | Sakura Finetek         | 4583                  |
|                                         | DAPI                                                                 | Invitrogen             | D3571                 |
|                                         | Fluoroshield with 1,4-Diazabicyclo [2.2.2] octane                    | Millipore Sigma        | F937                  |
| <b>Histology and Immunofluorescence</b> | Harris Hematoxylin                                                   | Millipore Sigma        | HHS16                 |
|                                         | Eosin Y                                                              | Richard Allen          | 7111                  |
|                                         | Periodic Acid-Schiff (PAS) Kit                                       | Millipore Sigma        | 395B                  |
|                                         | Gill No. 3 Hematoxylin                                               | Millipore Sigma        | GHS332                |
|                                         | Triton X-100                                                         | Millipore Sigma        | T8787                 |
|                                         | Fetal bovine serum                                                   | Millipore Sigma        | 12306C                |
|                                         | BOVINE SERUM ALBUMIN - Fraction V (Immunoglobulin and Protease Free) | Rockland               | BSA-50                |
|                                         |                                                                      |                        |                       |
| <b>Cell culture</b>                     | collagenase                                                          | Worthington            | LS004196              |
|                                         | phenol red-free EBM 2 media                                          | PromoCell              | C-22211               |
|                                         | EGM-2 Growth Medium 2 Supplement Mix                                 | PromoCell              | C-39216               |
|                                         | Trypsin-EDTA Solution 1X                                             | Millipore Sigma        | 54917C-100ML          |
|                                         | Penicillin-Streptomycin Solution, 100x                               | Corning                | 30-002-CI-PK          |

|                                                      |                                                                |                          |                   |
|------------------------------------------------------|----------------------------------------------------------------|--------------------------|-------------------|
|                                                      | Antibiotic Antimycotic Solution (100×),<br>Stabilized          | Millipore Sigma          | A5955-20ML        |
|                                                      | FITC-Ulex europaeus lectin                                     | Millipore Sigma          | L9006             |
|                                                      | gelatin                                                        | Millipore Sigma          | ES-006-B          |
|                                                      | Ruxolitinib                                                    | Selleck Chem             | S1378             |
|                                                      | MG132                                                          | Calbiochem               | 474790            |
|                                                      | Cycloheximide                                                  | Acros Organics           | 357420010         |
|                                                      | DMSO                                                           | Millipore Sigma          | 472301            |
|                                                      | Recombinant human IL-6                                         | R&D Systems              | 206-IL-050        |
|                                                      | Recombinant human sIL-6R $\alpha$                              | R&D Systems              | 227-SR-025/CF     |
| <b>Lentiviral delivery</b>                           | SOCS3 (NM_003955) Human Tagged ORF<br>Clone                    | Origene                  | RC209305          |
|                                                      | pLenti-C-Myc-DDK-P2A-tGFP Lentiviral Gene<br>Expression Vector | Origene                  | PS100088          |
|                                                      | PfuUltra II Fusion High-fidelity DNA<br>Polymerase             | Agilent                  | 600670            |
|                                                      | HEK293FT                                                       | Invitrogen               | R70007            |
|                                                      | pCMV-dR8.2 dvpr                                                | Addgene                  | 8455              |
|                                                      | pCMV-VSVG                                                      | Addgene                  | 8454              |
|                                                      | Vivacell 100, 30,000 MWCO PES, 10pc                            | Sartorius                | VC1022            |
| <b>Measurement of<br/>monolayer<br/>permeability</b> | 8-well electrode array                                         | Applied<br>Biophysics    | 8W10E PET         |
|                                                      | 96-well electrode array                                        | Applied<br>Biophysics    | 96W10idf PET      |
| <b>Gene knockdown</b>                                | ON-TARGETplus set of 4 SOCS3 siRNA                             | Dharmacon                | LQ-004299-00-0005 |
|                                                      | ON-TARGETplus non-targeting control pool                       | Dharmacon                | D-001810-10-20    |
|                                                      | Opti-MEM                                                       | Thermo Scientific        | 31985070          |
|                                                      | lipofectamine RNAiMAX transfection reagent                     | Invitrogen               | 13778150          |
| <b>Gel Electrophoresis and<br/>Immunoblotting</b>    | complete protease inhibitor mixture                            | Roche Applied<br>Science | 11697498001       |
|                                                      | PhosSTOP phosphatase inhibitor mixture                         | Roche Applied<br>Science | 4906845001        |
|                                                      | Sodium fluoride                                                | Millipore Sigma          | S-1504            |
|                                                      | phenyl arsine oxide                                            | Millipore Sigma          | P-3075            |
|                                                      | Sodium pyrophosphate decahydrate                               | Millipore Sigma          | 221368-100G       |
|                                                      | Sodium orthovanadate                                           | Millipore Sigma          | S6508             |
|                                                      | Transblot Turbo RTA Mini Nitrocellulose<br>Transfer kit        | Bio-Rad                  | 1704270           |
|                                                      | Clarity Western ECL Substrate                                  | Bio-Rad                  | 1705061           |
|                                                      | Clarity Max Western ECL Substrate                              | Bio-Rad                  | 1705062           |
|                                                      | SuperSignal West Femto Maximum<br>Sensitivity Substrate        | Pierce                   | 34094             |



|                                                 |                                                            |                   |             |
|-------------------------------------------------|------------------------------------------------------------|-------------------|-------------|
| <b>RNA isolation and RT-qPCR</b>                | 1.0 mm dia zirconia/silica beads                           | Biospec           | 11079110z   |
|                                                 | TRIzol reagent                                             | Invitrogen        | 15596018    |
|                                                 | PrimeScript RT Master Mix                                  | Takara Bio        | RR036B      |
|                                                 | iTaq Universal SYBR Green Supermix                         | Bio-Rad           | 1725125     |
| <b>Flow cytometry</b>                           | Collagenase type I                                         | Worthington       | LS004197    |
|                                                 |                                                            | Roche Applied     |             |
|                                                 | Dispase II                                                 | Science           | 10888700    |
|                                                 |                                                            | Roche Applied     |             |
|                                                 | DNase I                                                    | Science           | 10104159001 |
|                                                 | EDTA Capillary Blood Collection Tube                       | Sarstedt          | 20.1288.100 |
|                                                 | Pacific blue Annexin V Apoptosis Detection kit with 7-AAD  | Biologend         | 640926      |
|                                                 | Roche Applied                                              |                   |             |
|                                                 | RBC lysis buffer                                           | Science           | 11814389001 |
| <b>ELISA</b>                                    | IFN $\alpha$ kit                                           | Thermo Scientific | BMS216      |
|                                                 | IFN $\beta$ kit                                            | PBL Assay Science | 41410       |
|                                                 | IFN $\gamma$ kit                                           | Thermo Scientific | EHIFNG      |
| <b>Immunohistochemistry</b>                     | VECTASTAIN Elite ABC-HRP Kit                               | Vector Labs       | PK-6100     |
|                                                 | ImmPACT $\text{\textcircled{R}}$ DAB Substrate, Peroxidase | Vector Labs       | SK-4105     |
|                                                 | VectaMount Permanent Mounting Medium                       | Vector Labs       | H-5000      |
| <b>Isolation of RNA from spleen CD45+ cells</b> | Dynabeads M-280 Streptavidin                               | Invitrogen        | 11205D      |
|                                                 | RNeasy Plus Micro Kit                                      | Qiagen            | 74034       |
|                                                 | Falcon 70 $\mu$ m Cell Strainer                            | Corning           | 352350      |

**Supplemental Table 2****List of antibodies**

| <b>Target</b>                 | <b>Species</b> | <b>Clone or isotype</b> | <b>Conjugate</b> | <b>Vendor</b>             | <b>Catalog No</b> | <b>RRID</b> |
|-------------------------------|----------------|-------------------------|------------------|---------------------------|-------------------|-------------|
| <b>STAT3</b>                  | rabbit         | clone D1A5              |                  | Cell Signaling Technology | 8768S             | AB_2722529  |
| <b>pY705-STAT3</b>            | rabbit         | clone D3A7              |                  | Cell Signaling Technology | 9145L             | AB_2491009  |
| <b>SOCS3</b>                  | rabbit         | polyclonal IgG          |                  | Abcam                     | AB16030           | AB_443287   |
| <b>E-selectin</b>             | rabbit         | polyclonal IgG          |                  | Abcam                     | AB18981           | AB_470289   |
| <b>P-selectin</b>             | goat           | polyclonal IgG          |                  | R&D Systems               | AF737             | AB_2285644  |
| <b>CD45</b>                   | mouse          | clone 30-F11            | FITC             | BioLegend                 | 103107            | AB_312972   |
| <b>CD45</b>                   | mouse          | clone 30-F11            | Biotin           | BioLegend                 | 103104            | AB_312969   |
| <b>Histone H3 (citrulline</b> |                |                         |                  |                           |                   |             |
| <b>R2 + R8 + R17)</b>         | rabbit         | polyclonal IgG          |                  | Abcam                     | AB5103            | AB_304752   |
| <b>DDK</b>                    | mouse          | clone OT14C5            |                  | Origene                   | TA50011100        | AB_2622345  |
| <b>Turbo GFP</b>              | rabbit         | polyclonal IgG          |                  | Fujifilm Wako Chemicals   | AB513             |             |
| <b>β-actin</b>                | mouse          | clone AC-15             |                  | Millipore Sigma           | A5441             | AB_476744   |
| <b>α-smooth muscle</b>        |                |                         |                  |                           |                   |             |
| <b>actin</b>                  | mouse          | clone 1A4               |                  | Millipore Sigma           | A2547             | AB_476701   |
| <b>VE-cadherin</b>            | goat           | polyclonal              |                  | R&D Systems               | AF938             | AB_355726   |
| <b>Myeloperoxidase</b>        | rabbit         | clone EPR20257          |                  | Abcam                     | ab208670          | AB_2864724  |
| <b>F4/80</b>                  | rabbit         | clone D2S9R             |                  | Cell Signaling            | 70076S            | AB_2799771  |
| <b>Ly6G</b>                   | rat            | clone 1A8               | APC/Cy7          | BioLegend                 | 127624            | AB_10640819 |
| <b>mouse IgG</b>              | goat           | polyclonal              | HRP              | Jackson Immunoresearch    | 115-035-062       | AB_2338504  |
| <b>rabbit IgG</b>             | goat           | polyclonal              | HRP              | Jackson Immunoresearch    | 111-035-003       | AB_2313567  |
| <b>goat IgG</b>               | bovine         | polyclonal              | HRP              | Jackson Immunoresearch    | 805-035-180       | AB_2340874  |
| <b>mouse IgG</b>              | donkey         | polyclonal              | Alexa Fluor 647  | Invitrogen                | A-31571           | AB_162542   |
| <b>rabbit IgG</b>             | donkey         | polyclonal              | Alexa Fluor 647  | Invitrogen                | A-31573           | AB_2536183  |
| <b>goat IgG</b>               | donkey         | polyclonal              | Alexa Fluor 647  | Invitrogen                | A-21447           | AB_2535864  |
| <b>rabbit IgG</b>             | goat           | polyclonal              | Biotin           | Vector Labs               | BA-1000           | AB_2313606  |

**Supplemental Table 3**  
**Mouse RT-qPCR primers (SYBR green)**

| <b>Gene symbol</b> | <b>Forward</b>           | <b>Reverse</b>               |
|--------------------|--------------------------|------------------------------|
| <b>HPRT</b>        | TGGCCCTCTGTGTGCTCAA      | TGATCATTACAGTAGCTCTTCAGTCTGA |
| <b>C5AR</b>        | CCATTAGTGCCGACCGTTTCCT   | CACGAAGGATGGAATGGTGAGG       |
| <b>CD44</b>        | CGGAACCACAGCCTCCTTTCAA   | TGCCATCCGTTCTGAAACCACG       |
| <b>CEMIP</b>       | CTCTACACAGGTCAAGGTGGCA   | CCATCACCACAATGTTCCGAGTC      |
| <b>CLU</b>         | GATGATCCACCAGGCTCAACAG   | ACACAGTGCGGTCATCTTCACC       |
| <b>CXCL2</b>       | CATCCAGAGCTTGAGTGTGACG   | GGCTTCAGGGTCAAGGCAAACCT      |
| <b>CXCL9</b>       | CCTAGTGATAAGGAATGCACGATG | CTAGGCAGGTTTGATCTCCGTTT      |
| <b>DDX58</b>       | AGCCAAGGATGTCTCCGAGGAA   | ACACTGAGCACGCTTTGTGGAC       |
| <b>ET1</b>         | CTACTTCTGCCACCTGGACATC   | CGCACTGACATCTAACTGCCTG       |
| <b>F3</b>          | GCACCGAGCAATGGAAGAGTTTC  | CTTTCTGTCCCGCTCGGTTCTT       |
| <b>FOS</b>         | GGGAATGGTGAAGACCGTGTCA   | GCAGCCATCTTATTCCGTTCCC       |
| <b>HAVCR1</b>      | CTGGAATGGCACTGTGACATCC   | GCAGATGCCAACATAGAAGCCC       |
| <b>ICAM</b>        | AAACCAGACCCTGGAACCTGCAC  | GCCTGGCATTTCAGAGTCTGCT       |
| <b>HNF1</b>        | AGAGACCTTGGTGGAGGAGTGT   | GGCAAACCAGTTGTAGACACGC       |
| <b>IFIH1</b>       | TGCGGAAGTTGGAGTCAAAGCG   | CACCGTCGTAGCGATAAAGCAGA      |
| <b>IL18</b>        | GACAGCCTGTGTTGAGGATATG   | TGTTCTTACAGGAGAGGGTAGAC      |
| <b>IL6</b>         | TACCACTTCAACAAGTCGGAGGC  | CTGCAAGTGCATCATCGTTGTTT      |
| <b>IRF1</b>        | TCCAAGTCCAGCCGAGACACTA   | ACTGCTGTGGTCATCAGGTAGG       |
| <b>IRF7</b>        | CCTCTGCTTTCTAGTGATGCCG   | CGTAAACACGGTCTTGCTCCTG       |
| <b>IRF8</b>        | AGGTCTTCGACACCAGCCAGTT   | GCACGAGAATGAGTTTGGAGCG       |
| <b>KLF2</b>        | CGCCGCCACACATACTTG       | AACTCCAGCCGCATCCTT           |
| <b>LCN2</b>        | ATGTCACCTCCATCCTGGTCAG   | GCCACTTGCACATTGTAGCTCTG      |
| <b>MX1</b>         | TGGACATTGCTACCACAGAGGC   | TTGCCTTACAGCACCTCTGTCCA      |
| <b>OAS2</b>        | CACCAAAGTCTGAAGACCGTC    | AGAGTCGTAACCTCTCCAGCGAG      |
| <b>OAS3</b>        | TTCTCTGCCAGCTTCGGAAAGC   | CTCTGAAGGCAGACTTGTGACC       |
| <b>OASL1</b>       | TGAAGAGCCTCCTTCGGTTGGT   | TCCAGCCTGAAGTTGGCATCCT       |
| <b>OASL2</b>       | CCAAAACGAGGTCGTCAGGAAC   | AGCCACCTGTTCCCATCCCTTT       |
| <b>PLAT</b>        | GTTACACAGCGTGGAGGACCAA   | CACGTCAGCTTTTCGGTCTTCA       |
| <b>PLAU</b>        | AGAAGCGACCCTGGTGCTATGT   | CCACACTGGAAGCCTTGTGGT        |
| <b>PLAUR</b>       | AGGACTACCGTGCTTCGGGAAT   | ACACGGTCTCTGTCAGGCTGAT       |
| <b>PROCR</b>       | CCTCCAAAGCAGCCAACTTCAC   | GTGTAAGAGCGACCTGTTTGGC       |
| <b>PTGS2</b>       | GCGACATACTCAAGCAGGAGCA   | AGTGGTAACCGCTCAGGTGTTG       |
| <b>RHOU</b>        | TGGTCAGCTACACCACTAACGG   | TGCAGTGTACAGAGCTGGAGT        |
| <b>SELE</b>        | GGACACCACAAATCCCAGTCTG   | TCGCAGGAGAACTCACAACCTGG      |
| <b>SELP</b>        | AAGATGCCTGGCTACTGGACAC   | CAAGAGGCTGAACGCAGGTCAT       |
| <b>SERPINE1</b>    | CCTCTTCCACAAGTCTGATGGC   | GCAGTTCCACAACGTCATACTCG      |
| <b>SOCS3</b>       | GGACCAAGAACCTACGCATCCA   | CACCAGCTTGAGTACACAGTCCG      |
| <b>STAT2</b>       | GAACCAACTCTCCATTGCCTGG   | CGTAAGAGGAGAACTGCCAGCT       |
| <b>STAT3</b>       | AGGAGTCTAACAACGGCAGCCT   | GTGGTACACCTCAGTCTCGAAG       |
| <b>SYNPO</b>       | TCCTTCTCACCCGGAATGCTG    | AGCCGTCAGGCTGCTAGGAG         |
| <b>TFPIA</b>       | CTGTGAGAATCCAGTCCACTCC   | GCCACGATAATCCCGACG           |
| <b>TFPIB</b>       | CTGTGAGAATCCAGTCCACTCC   | TCTTCTTTTGTAAACCCGACGC       |
| <b>TFPIC</b>       | CTGTGAGAATCCAGTCCACTCC   | TACCAAGGCAGCCCGAC            |
| <b>THBD</b>        | GGAGAATGGTGGCTGTGAGTAC   | GCACGATTGAACCACAGGTCTTG      |

|              |                        |                        |
|--------------|------------------------|------------------------|
| <b>TSP1</b>  | TGGCCAGCGTTGCCA        | TCTGCAGCACCCCCTGAA     |
| <b>VEGFA</b> | CTGCTGTAACGATGAAGCCCTG | GCTGTAGGAAGCTCATCTCTCC |
| <b>VWF</b>   | AACAGACGATGGTGGACTCAGC | CGATGGACTCACAGGAGCAAGT |
| <b>PTPRC</b> | CTTCAGTGGTCCCATTGTGGTG | TCAGACACCTCTGTCGCCTTAG |

### Human RT-qPCR primers (SYBR green)

| <b>Gene symbol</b> | <b>Forward</b>          | <b>Reverse</b>          |
|--------------------|-------------------------|-------------------------|
| <b>GAPDH</b>       | GTCTCCTCTGACTTCAACAGCG  | ACCACCCTGTTGCTGTAGCCAA  |
| <b>SOCS3</b>       | CATCTCTGTCGGAAGACCGTCA  | GCATCGTACTGGTCCAGGAAGT  |
| <b>IL6</b>         | AGACAGCCACTCACCTTTTCAG  | TTCTGCCAGTGCCTCTTTGCTG  |
| <b>CXCL2</b>       | GGCAGAAAGCTTGTCTCAACCC  | CTCCTTCAGGAACAGCCACCAA  |
| <b>RHOJ</b>        | ACTGCCTTCGACAACCTTCTCCG | GAGCAGGAAGATGTCTGTGTTGG |
| <b>PTGS2</b>       | CGGTGAAACTCTGGCTAGACAG  | GCAAACCGTAGATGCTCAGGGA  |
| <b>IFNA2</b>       | TGGGCTGTGATCTGCCTCAAAC  | CAGCCTTTTGGAACTGGTTGCC  |
| <b>IFNA17</b>      | GAAGACTCAAGCCATCTCTGTCC | TAGGAGGCTCTGTTCCCAAGCA  |
| <b>IFNB</b>        | CTTGGATTCTACAAAGAAGCAGC | TCCTCCTTCTGGAACTGCTGCA  |
| <b>MX1</b>         | GGCTGTTTACCAGACTCCGACA  | CACAAAGCCTGGCAGCTCTCTA  |
| <b>IRF1</b>        | GAGGAGGTGAAAGACCAGAGCA  | TAGCATCTCGGCTGGACTTCGA  |
| <b>IRF7</b>        | CCACGCTATACCATCTACCTGG  | GCTGCTATCCAGGGAAGACACA  |
| <b>ADAMTS1</b>     | GCGTCAATGCTTTCCAACCTGG  | GGGATTCTGAGGCTTGTCCATC  |
| <b>ADAMTS4</b>     | TCACTGACTTCTGGACAATGGC  | GGTCAGCATCATAGTCCTTGCC  |
| <b>ADAMTS9</b>     | CCATTCAGAGGTGCAGTGAGTTC | ACCAGACCTGGCGGTGCTTATG  |
| <b>TMEM2</b>       | GGAATAGGACTGACCTTTGCCAG | TTCTGACCACCCTGAAAGCCGT  |
| <b>CEMIP</b>       | ACCGAGCACATTCCAACCTACCG | GGCAGAGATGATTGAGAGGAACG |
| <b>ARID5A</b>      | TGGCAAGCAGAACGGAATCCAG  | CTTGTAGAGGCTGACCAGGAAG  |
| <b>CNKS3</b>       | AAAACCTACGGTGGAAGCCACC  | ATCCAGGATGGCTGACTTCTCC  |
| <b>EPST1</b>       | ACTGAAACGGCAGCAGCAAGAG  | TCCAACAGCCTCCAGATTGCTC  |
| <b>GNA14</b>       | AAGCAGCTCTGGCAAGATCCAG  | GTAGGCACGAATGATGGTGTGG  |
| <b>KLF4</b>        | ACCTACACAAAGAGTTCCCATC  | TGTGTTTACGGTAGTGCCTG    |
| <b>PTPN13</b>      | GGATGAAGCCACTTACTCCAGC  | CTCCAGGCTTAGGAGGTGATGA  |
| <b>BATF3</b>       | ACCGAGTTGCTGCTCAGAGAAG  | AGGTGCTTCAGCTCCTCTGTCA  |
| <b>SBNO2</b>       | GAGAACGATGGGCACCTCAACT  | TGTCCCGCTTTCTCTTGGTGG   |

**Supplemental Table 4  
Primers for genotyping**

|            |                                         | <b>Male</b>   | <b>Female</b> |
|------------|-----------------------------------------|---------------|---------------|
| <b>SRY</b> |                                         | <b>273 bp</b> | -             |
| Fwd        | TTG TCT AGA GAG CAT GGA GGG CCA TGT CAA |               |               |
| Rev        | CCA CTC CTC TGT GAC ACT TTA GCC CTC CGA |               |               |

|                   |                            | <b>WT</b>    | <b>Flox</b>   |
|-------------------|----------------------------|--------------|---------------|
| <b>SOCS3 flox</b> |                            | <b>52 bp</b> | <b>181 bp</b> |
| Fwd               | CGG GCA GGG GAA GAG ACT GT |              |               |
| Rev               | TCG ACT GTC CTC GGT CAC    |              |               |

|                     |                            | <b>WT</b>     | <b>Tom</b>    |
|---------------------|----------------------------|---------------|---------------|
| <b>Rosa26 locus</b> |                            | <b>297 bp</b> | <b>196 bp</b> |
| Wild type Fwd       | AAG GGA GCT GCA GTG GAG TA |               |               |
| Wild type Rev       | CCG AAA ATC TGT GGG AAG TC |               |               |
| Mutant Fwd          | CTG TTC CTG TAC GGC ATG G  |               |               |
| Mutant Rev          | GGC ATT AAA GCA GCG TAT CC |               |               |

|                       |                                         | <b>Present</b>     | <b>Deleted</b> |
|-----------------------|-----------------------------------------|--------------------|----------------|
| <b>SOCS3 Deletion</b> |                                         | <b>&gt;1400 bp</b> | <b>424 bp</b>  |
| Fwd                   | GCG GGC AGG GGA AGA GAC TGT CTG GGG TTG |                    |                |
| Rev                   | CCT TTT CTC TTC CAT CCT TCC             |                    |                |

|            |                            | <b>WT</b> | <b>Cre</b>    |
|------------|----------------------------|-----------|---------------|
| <b>Cre</b> |                            | -         | <b>199 bp</b> |
| Fwd        | ACC AGC CAG CTA TCA ACT CG |           |               |
| Rev        | TTA CAT TGG TCC AGC CAC C  |           |               |

**Supplemental Table 5**

| <b>Score</b>         | <b>0</b>    | <b>1</b>                                | <b>2</b>                            | <b>3</b>                           |
|----------------------|-------------|-----------------------------------------|-------------------------------------|------------------------------------|
| <b>Appearance</b>    | Smooth coat | Slightly roughed fur                    | Majority of fur on back is ruffled  | Piloerection, puffy appearance     |
| <b>Consciousness</b> | Active      | Active, avoids standing upright         | Active only when provoked           | Non-responsive, even when provoked |
| <b>Activity</b>      | Normal      | Suppressed eating, drinking, or running | Stationary                          | Stationary, even when provoked     |
| <b>Eyes</b>          | Open        | Not fully open, potential secretions    | Half closed, potential secretions   | No response to touch stimulus      |
| <b>Posture</b>       | Normal      | Hunched, moving freely                  | Hunched, strained or stiff movement | Hunched, little or no movement     |

**Supplemental Table 6**

| Mouse ID | Gender | Genotype | Tx     | Group        | Pre-TX Wei | Pre-TX Terr | Time post-TX | Post-TX Wei |
|----------|--------|----------|--------|--------------|------------|-------------|--------------|-------------|
| 5129     | F      | fl/+     | Saline | Saline_fl/+  | 21.2       | 37.5        | 16.5         | 21          |
| 5130     | F      | fl/fl    | Saline | Saline_fl/fl | 21.3       | 37.7        | 16.5         | 21.2        |
| 5132     | M      | fl/fl    | Saline | Saline_fl/fl | 19.2       | 37.4        | 16.5         | 18.1        |
| 5133     | F      | fl/fl    | Saline | Saline_fl/fl | 20.4       | 37.2        | 16.5         | 19.1        |
| 5135     | M      | fl/fl    | Saline | Saline_fl/fl | 21.9       | 37.9        | 16.5         | 21          |
| 5137     | M      | fl/fl    | LPS    | LPS_fl/fl    | 21.6       | 37.9        | 16.5         | 19.8        |
| 5139     | M      | +/+      | Saline | Saline_+/+   | 23.2       | 37.2        | 16.5         | 22.4        |
| 5140     | F      | +/+      | LPS    | LPS_+/+      | 20.7       | 38.1        | 16.5         | 18.3        |
| 5142     | F      | fl/+     | Saline | Saline_fl/+  | 17.3       | 38.1        | 16.5         | 16.7        |
| 5143     | F      | fl/+     | LPS    | LPS_fl/+     | 21.2       | 37.6        | 16.5         | 19.2        |
| 5144     | M      | fl/+     | LPS    | LPS_fl/+     | 24.9       | 37.9        | 16.5         | 22.9        |
| 5150     | M      | fl/fl    | Saline | Saline_fl/fl | 25.3       | 37.6        | 14.5         | 25.6        |
| 5151     | F      | fl/fl    | Saline | Saline_fl/fl | 19.9       | 37.4        | 14.5         | 19.4        |
| 5155     | F      | fl/fl    | LPS    | LPS_fl/fl    | 20.8       | 37.8        | 14.5         | 19.7        |
| 5156     | F      | fl/fl    | LPS    | LPS_fl/fl    | 22.4       | 37.8        | 14.5         | 19.9        |
| 5178     | M      | fl/fl    | LPS    | LPS_fl/fl    | 22.7       | 37.3        | 14.5         | 21.7        |
| 5179     | M      | fl/fl    | Saline | Saline_fl/fl | 24.4       | 37.2        | 14.5         | 24.9        |
| 5180     | F      | +/+      | LPS    | LPS_+/+      | 19.4       | 38.1        | 14.5         | 17.9        |
| 5181     | M      | fl/+     | LPS    | LPS_fl/+     | 22.5       | 37.1        | 14.5         | 21.9        |
| 5182     | F      | fl/fl    | Saline | Saline_fl/fl | 21.2       | 37.6        | 14.5         | 19.2        |
| 5183     | F      | +/+      | Saline | Saline_+/+   | 19.8       | 38          | 14.5         | 21          |
| 5184     | M      | fl/+     | Saline | Saline_fl/+  | 25.7       | 37.8        | 14.5         | 26.9        |
| 5185     | M      | fl/+     | LPS    | LPS_fl/+     | 26.1       | 37.8        | 14.5         | 23.9        |
| 5219     | M      | +/+      | LPS    | LPS_+/+      | 27.1       | 37.5        | 14.5         | 24.2        |
| 5220     | M      | fl/+     | LPS    | LPS_fl/+     | 28.2       | 37          | 14.5         | 26.5        |
| 5221     | M      | fl/+     | saline | Saline_fl/+  | 25.4       | 37.2        | 14.5         | 25.6        |
| 5226     | M      | +/+      | saline | Saline_+/+   | 25.1       | 37.7        | 14.5         | 25.4        |
| 5228     | M      | fl/+     | LPS    | LPS_fl/+     | 25.3       | 37.6        | 14.5         | 23          |
| 5230     | F      | +/+      | LPS    | LPS_+/+      | 20.2       | 37.5        | 14.5         | 18.5        |
| 5231     | F      | fl/+     | LPS    | LPS_fl/+     | 19.4       | 37.3        | 14.5         | 18.3        |
| 5232     | F      | fl/fl    | LPS    | LPS_fl/fl    | 20.7       | 37.9        | 14.5         | 19.6        |
| 5233     | M      | fl/+     | LPS    | LPS_fl/+     | 26.2       | 36.9        | 14.5         | 25          |
| 5234     | M      | +/+      | LPS    | LPS_+/+      | 28.1       | 36.9        | 14.5         | 26.1        |
| 5239     | F      | fl/+     | LPS    | LPS_fl/+     | 21.2       | 37.3        | 14.5         | 19.3        |
| 5240     | F      | fl/+     | saline | Saline_fl/+  | 19.8       | 37.6        | 14.5         | 20          |
| 5241     | M      | fl/+     | saline | Saline_fl/+  | 26.6       | 37.2        | 14.5         | 27.1        |
| 5242     | M      | fl/fl    | LPS    | LPS_fl/fl    | 22.9       | 37.6        | 14.5         | 21.3        |
| 5243     | M      | +/+      | LPS    | LPS_+/+      | 28.3       | 37.8        | 14.5         | 26.1        |
| 5244     | M      | +/+      | LPS    | LPS_+/+      | 28.4       | 37          | 14.5         | 26          |
| 5245     | F      | +/+      | saline | Saline_+/+   | 20.8       | 37.4        | 14.5         | 21.2        |

| Post-TX | Ter  | Delta Weig | Delta Tem | Appearanc | Consciousn | Activity | Eyes | Posture | Score |
|---------|------|------------|-----------|-----------|------------|----------|------|---------|-------|
| 38.2    | -0.2 | 0.7        | 0         | 0         | 0          | 0        | 0    | 0       | 0     |
| 37.9    | -0.1 | 0.2        | 0         | 0         | 0          | 0        | 0    | 0       | 0     |
| 38.4    | -1.1 | 1          | 0         | 0         | 0          | 1        | 0    | 1       | 0     |
| 38.1    | -1.3 | 0.9        | 0         | 0         | 0          | 0        | 0    | 0       | 0     |
| 37.9    | -0.9 | 0.1        | 0         | 0         | 0          | 0        | 0    | 0       | 0     |
| 35.7    | -1.8 | -2.2       | 1         | 2         | 2          | 1        | 2    | 8       | 0     |
| 38.1    | -0.8 | 0.8        | 0         | 0         | 0          | 0        | 0    | 0       | 0     |
| 36.2    | -2.4 | -1.9       | 1         | 1         | 0          | 2        | 1    | 5       | 0     |
| 38.2    | -0.6 | 0.1        | 0         | 0         | 0          | 0        | 0    | 0       | 0     |
| 34.4    | -2   | -3.2       | 1         | 1         | 1          | 2        | 2    | 7       | 0     |
| 37.1    | -2   | -0.9       | 1         | 0         | 0          | 1        | 1    | 3       | 0     |
| 37.6    | 0.3  | 0          | 0         | 0         | 0          | 0        | 0    | 0       | 0     |
| 37.7    | -0.5 | 0.3        | 0         | 0         | 0          | 0        | 0    | 0       | 0     |
| 33.9    | -1.1 | -3.9       | 2         | 3         | 3          | 0        | 3    | 11      | 0     |
| 37.2    | -2.5 | -0.6       | 0         | 0         | 1          | 1        | 0    | 2       | 0     |
| 33.9    | -1   | -3.4       | 1         | 3         | 3          | 2        | 3    | 12      | 0     |
| 37.7    | 0.5  | 0.4        | 0         | 0         | 0          | 0        | 0    | 0       | 0     |
| 36.3    | -1.5 | -1.8       | 1         | 2         | 2          | 2        | 1    | 8       | 0     |
| 37.8    | -0.6 | 0.7        | 0         | 0         | 0          | 0        | 0    | 0       | 0     |
| 37.7    | -2   | 0.2        | 0         | 0         | 0          | 0        | 0    | 0       | 0     |
| 37.6    | 1.2  | -0.4       | 0         | 0         | 0          | 0        | 0    | 0       | 0     |
| 38.1    | 1.2  | 0.2        | 0         | 0         | 0          | 0        | 0    | 0       | 0     |
| 36.2    | -2.2 | -1.6       | 1         | 1         | 1          | 1        | 1    | 5       | 0     |
| 37.2    | -2.9 | -0.3       | 0         | 1         | 1          | 1        | 0    | 3       | 0     |
| 36.8    | -1.7 | -0.2       | 1         | 1         | 1          | 1        | 1    | 5       | 0     |
| 38.1    | 0.2  | 0.9        | 0         | 0         | 0          | 0        | 0    | 0       | 0     |
| 37.8    | 0.3  | 0.1        | 0         | 0         | 0          | 0        | 0    | 0       | 0     |
| 36.9    | -2.3 | -0.7       | 1         | 1         | 1          | 2        | 1    | 6       | 0     |
| 35.8    | -1.7 | -1.7       | 1         | 1         | 2          | 1        | 3    | 8       | 0     |
| 34.6    | -1.1 | -2.7       | 1         | 2         | 3          | 2        | 2    | 10      | 0     |
| 33.9    | -1.1 | -4         | 2         | 3         | 3          | 1        | 3    | 12      | 0     |
| 36.4    | -1.2 | -0.5       | 2         | 1         | 1          | 2        | 1    | 7       | 0     |
| 36.8    | -2   | -0.2       | 1         | 0         | 1          | 1        | 1    | 4       | 0     |
| 35.2    | -1.9 | -2.1       | 1         | 1         | 2          | 2        | 2    | 8       | 0     |
| 38      | 0.2  | 0.4        | 0         | 0         | 0          | 0        | 0    | 0       | 0     |
| 38      | 0.5  | 0.8        | 0         | 0         | 0          | 0        | 0    | 0       | 0     |
| 34.5    | -1.6 | -3.1       | 2         | 3         | 3          | 2        | 3    | 13      | 0     |
| 37.3    | -2.2 | -0.4       | 1         | 0         | 0          | 0        | 1    | 2       | 0     |
| 37.4    | -2.4 | 0.4        | 1         | 0         | 0          | 1        | 1    | 3       | 0     |
| 37.9    | 0.4  | 0.5        | 0         | 0         | 0          | 0        | 0    | 0       | 0     |



| WBC   | NEU   | LYM  | MONO | EOS  | BAS  | RBC   | HGB  | PLT  |
|-------|-------|------|------|------|------|-------|------|------|
| 7.53  | 1.08  | 6.33 | 0.04 | 0.05 | 0.03 | 10.22 | 15.7 | 1013 |
| 8.21  | 3.47  | 4.41 | 0.18 | 0.06 | 0.09 | 8.87  | 14.6 | 1038 |
| 3.19  | 1.2   | 1.92 | 0.04 | 0.02 | 0.01 | 9.6   | 15   | 1044 |
| 3.98  | 0.72  | 3.12 | 0.04 | 0.09 | 0.01 | 8.17  | 13.3 | 659  |
| 6.78  | 1.29  | 5.34 | 0.08 | 0.05 | 0.02 | 10.27 | 15.7 | 1197 |
| 5.17  | 3.8   | 0.76 | 0.34 | 0.2  | 0.07 | 8.76  | 13.5 | 559  |
| 5.95  | 1.21  | 4.61 | 0.08 | 0.03 | 0.02 | 10.8  | 16.3 | 957  |
| 2.92  | 1.77  | 0.8  | 0.19 | 0.12 | 0.04 | 8.33  | 13   | 576  |
| 6.07  | 1.24  | 4.61 | 0.12 | 0.06 | 0.04 | 10.08 | 15.7 | 1213 |
| 2.63  | 1.32  | 1.08 | 0.15 | 0.06 | 0.02 | 8.8   | 13.2 | 399  |
| 1.85  | 1.45  | 0.25 | 0.06 | 0.08 | 0.01 | 8.93  | 13.8 | 473  |
| 4.73  | 0.93  | 3.59 | 0.12 | 0.08 | 0.01 | 9.38  | 14.6 | 868  |
| 4.11  | 1.2   | 2.77 | 0.06 | 0.05 | 0.03 | 9.63  | 15.5 | 1146 |
| 2.35  | 1.43  | 0.61 | 0.22 | 0.07 | 0.02 | 9.03  | 15.1 | 658  |
| 1.71  | 1.12  | 0.38 | 0.15 | 0.05 | 0.01 | 8.86  | 14.4 | 374  |
| 3.62  | 2.2   | 0.7  | 0.49 | 0.19 | 0.04 | 8.2   | 13   | 377  |
| 5.34  | 0.82  | 4.41 | 0.07 | 0.03 | 0.01 | 9.46  | 14.7 | 1027 |
| 1.58  | 0.97  | 0.49 | 0.09 | 0.02 | 0.01 | 8.94  | 14.6 | 377  |
| 3.17  | 0.86  | 2.2  | 0.08 | 0.02 | 0.01 | 9.28  | 15.2 | 834  |
| 5.93  | 3.5   | 2.12 | 0.2  | 0.06 | 0.05 | 8.69  | 14.2 | 776  |
| 5.92  | 1.16  | 4.59 | 0.07 | 0.07 | 0.03 | 9.47  | 15.2 | 1353 |
| 5.1   | 1.22  | 3.63 | 0.13 | 0.11 | 0.01 | 9.24  | 14.5 | 1344 |
| 3.49  | 2.55  | 0.66 | 0.17 | 0.09 | 0.02 | 8.62  | 13.6 | 612  |
| 3.3   | 2.57  | 0.47 | 0.16 | 0.06 | 0.04 | 8.62  | 13.8 | 527  |
| 3.76  | 2.82  | 0.75 | 0.11 | 0.06 | 0.02 | 8.46  | 13.5 | 645  |
| 10.6  | 2.61  | 7.34 | 0.28 | 0.3  | 0.07 | 8.92  | 14.3 | 1453 |
| 6.64  | 2.22  | 4.02 | 0.23 | 0.12 | 0.05 | 9.12  | 14.4 | 1397 |
| 0.35  | 0.24  | 0.07 | 0.03 | 0.01 | 0    | 1.05  | 1.7  | 48   |
| 2.12  | 1.3   | 0.62 | 0.09 | 0.08 | 0.03 | 8.4   | 13.8 | 287  |
| 4.28  | 2.99  | 1.03 | 0.16 | 0.08 | 0.02 | 8.02  | 12.7 | 671  |
| 6.45  | 3.4   | 1.93 | 0.57 | 0.43 | 0.12 | 10.98 | 17.8 | 443  |
| 18.05 | 13.04 | 1.83 | 2.18 | 0.66 | 0.34 | 8.23  | 13.4 | 674  |
| 2.61  | 1.57  | 0.8  | 0.14 | 0.07 | 0.03 | 8.44  | 13.8 | 630  |
| 2.15  | 0.93  | 1    | 0.13 | 0.07 | 0.02 | 8.39  | 13.5 | 351  |
| 8.27  | 1.81  | 5.8  | 0.32 | 0.18 | 0.16 | 8.86  | 14.8 | 1111 |
| 6.19  | 1.4   | 4.37 | 0.2  | 0.18 | 0.04 | 8.77  | 14.7 | 684  |
| 4.59  | 3.31  | 0.78 | 0.27 | 0.16 | 0.07 | 9.24  | 15   | 538  |
| 2.73  | 1.89  | 0.44 | 0.18 | 0.16 | 0.06 | 8.08  | 13.4 | 436  |
| 3.21  | 2.43  | 0.45 | 0.16 | 0.13 | 0.04 | 8.16  | 13.7 | 333  |
| 12.34 | 1.94  | 9.8  | 0.25 | 0.28 | 0.07 | 8.69  | 14.7 | 1357 |

| Plasma IL-6 | Plasma TNF | pH    | Sodium | Potassium | Chloride | Calcium, io | Lactate | BUN |
|-------------|------------|-------|--------|-----------|----------|-------------|---------|-----|
| 50.28       | 165.09     | 7.266 | 143    | 5.8       | 123      | 0.78        | 8.84    | 31  |
| 0           | 145.56     | 7.121 | 146    | 4.8       | 114      | 1.2         | 9.97    | 24  |
| 19.17       | 177.96     | 7.298 | 143    | 5.7       | 112      | 0.81        | 8.01    | 30  |
| 1.53        | 125.09     | 7.155 | 139    | 5.3       | 114      | 1.01        | 8.57    | 38  |
| 21.39       | 188.8      | 7.354 | 140    | 7.3       | 115      | 0.81        | 3.11    | 49  |
| 14614.72    | 412.87     | 7.193 | 141    | 7.7       | 123      | 0.63        | 8.22    | 115 |
| 57.78       | 146.76     | 7.119 | 140    | 6.3       | 114      | 0.84        | 8.65    | 32  |
| 1915.83     | 462.87     |       |        |           |          |             |         |     |
| 74.72       | 145.46     | 6.888 | 143    | 5.6       | 115      | 1.08        | 14.25   | 35  |
| 15394.44    | 1098.75    |       |        |           |          |             |         |     |
| 901.11      | 361.57     | 7.367 | 144    | 6.5       | 123      | 0.7         | 5.26    | 72  |
| 67.78       | 176.67     | 7.273 | 147    | 7.6       | 120      | 0.76        | 8.59    | 29  |
| 62.22       | 414.75     | 7.448 | 141    | 5.9       | 117      | 0.54        | 7.97    | 31  |
| 16021.39    | 249.72     | 7.311 | 138    | 10.7      | 123      | 0.53        | 10.69   | 103 |
| 273.61      | 205.09     | 7.235 | 147    | 7.6       | 121      | 1.05        | 8.09    | 58  |
| 19471.39    | 591.76     |       |        |           |          |             |         |     |
| 58.61       | 166.02     | 7.085 | 144    | 4.8       | 116      | 1.04        | 11.1    | 26  |
| 4780.56     | 242.22     |       |        |           |          |             |         |     |
| 19.03       | 179.91     |       |        |           |          |             |         |     |
| 177.22      | 103.8      | 7.305 | 150    | 6.3       | 116      | 0.98        | 8.48    | 59  |
| 44.17       | 97.59      | 6.969 | 148    | 4.8       | 117      | 1.11        | 14.39   | 25  |
| 26.67       | 162.96     | 7.221 | 147    | 6.2       | 122      | 0.8         | 9.74    | 31  |
| 2417.78     | 302.69     | 7.159 | 147    | 5.2       | 115      | 1.02        | 7.65    | 81  |
| 1017.5      | 346.2      | 7.3   | 148    | 5.3       | 115      | 1.03        | 4.43    | 56  |
| 2418.89     | 330.56     | 7.28  | 148    | 5         | 119      | 1           | 3.94    | 87  |
| 49.17       | 227.04     | 7.266 | 147    | 4.5       | 114      | 1           | 7.04    | 29  |
| 34.17       | 163.06     | 7.281 | 147    | 4.7       | 113      | 1.06        | 6.44    | 25  |
| 976.39      | 210.37     | 7.342 | 147    | 6.1       | 124      | 0.84        | 3.6     | 70  |
| 2265.83     | 319.81     | 7.321 | 149    | 6.3       | 122      | 0.93        | 4.22    | 89  |
| 15201.94    | 375.28     | 7.272 | 146    | 5.5       | 120      | 0.82        | 5.57    | 112 |
| 19066.67    | 908.33     |       |        |           |          |             |         |     |
| 5830.83     | 296.67     | 7.251 | 150    | 6.1       | 118      | 1.03        | 5.52    | 120 |
| 1151.94     | 254.17     | 7.305 | 149    | 4.8       | 116      | 1.12        | 2.7     | 73  |
| 9171.39     | 308.52     | 7.35  | 143    | 6.6       | 124      | 0.59        | 4.23    | 120 |
| 212.22      | 207.41     |       |        |           |          |             |         |     |
| 80          | 121.67     | 7.291 | 148    | 4.5       | 114      | 1.11        | 5.99    | 26  |
| 19425.56    | 365.93     |       |        |           |          |             |         |     |
| 623.89      | 194.26     | 7.281 | 146    | 8.4       | 120      | 0.94        | 3.34    | 66  |
| 1295.83     | 237.69     | 7.309 | 148    | 6.5       | 128      | 0.81        | 3.81    | 76  |
| 383.33      | 245.93     | 7.212 | 148    | 4.3       | 116      | 1.05        | 8.6     | 23  |

| Creatinine | Glucose | Comments    | KIDNEY-ICA | Kidney_SEL | Kidney_IL6 | Kidney_SO | Kidney_ST | Kidney_CEI |
|------------|---------|-------------|------------|------------|------------|-----------|-----------|------------|
| 0.54       | 323     |             | 0.974237   | 2.852996   | 0.429458   | 0.917319  | 1.331688  | 4.059992   |
| 0.51       | 285     |             | 1.208472   | 9.704373   | 0.970508   | 1.567294  | 1.441893  | 3.798868   |
| 0.65       | 290     |             | 0.777296   | 2.334025   | 1.001053   | 1.499879  | 1.354241  | 3.372349   |
| 0.63       | 367     |             | 1.39187    | 12.26424   | 1.208547   | 2.178168  | 1.523736  | 3.906482   |
| 0.61       | 351     |             | 1.50124    | 3.955029   | 1.790699   | 2.391218  | 1.510737  | 2.534373   |
| 1.23       | 42      |             | 4.593022   | 59.14627   | 165.4945   | 41.83384  | 5.45406   | 6.947351   |
| 0.61       | 334     |             | 1          | 1          | 1          | 1         | 1         | 1          |
|            |         |             | 8.689115   | 39.91817   | 45.61319   | 27.0153   | 3.591692  | 9.752334   |
| 0.71       | 367     |             | 1.022538   | 1.98099    | 1.128824   | 1.765676  | 1.554816  | 3.98246    |
|            |         |             | 10.62946   | 61.36169   | 243.0559   | 76.68324  | 6.911494  | 14.55335   |
| 0.86       | 47      |             | 8.303351   | 35.71454   | 36.39814   | 19.79696  | 3.283171  | 4.846128   |
| 0.74       | 253     |             | 1.417461   | 0.890607   | 1.141455   | 1.187038  | 0.660242  | 0.267909   |
| 0.86       | 134     |             | 1.352659   | 5.277981   | 0.196408   | 1.817712  | 0.003825  | 0.018837   |
| 1.39       | 89      |             | 46.60823   | 12.60698   | 1264.124   | 61.87883  | 5.80375   | 2.150206   |
| 0.69       | 116     | No respons  | 2.274288   | 2.505605   | 70.36199   | 1.060961  | 0.432337  | 0.167342   |
|            |         |             | 13.04893   | 0.264578   | 0.045541   | 12.51965  | 4.08E-05  |            |
| 0.58       | 314     |             | 1.179205   | 0.567816   | 0.706134   | 0.63405   | 0.455436  | 0.39091    |
|            |         |             | 17.22841   | 5.541168   | 307.2423   | 46.08009  | 3.170833  | 2.70292    |
|            |         |             | 1.65539    | 0.319231   | 1.398057   | 0.498688  | 0.586179  | 0.410729   |
| 0.87       | 90      | Ascites and | 3.129167   | 3.674782   | 40.7873    | 5.060939  | 1.78649   | 11.2968    |
| 0.52       | 336     |             | 1          | 1          | 1          | 1         | 1         | 1          |
| 0.79       | 261     |             | 0.846414   | 0.400316   | 1.535373   | 0.657658  | 0.412856  | 0.341662   |
| 0.92       | 87      |             | 12.59868   | 4.021119   | 111.9814   | 18.37697  | 2.026462  | 0.986205   |
| 0.88       | 80      |             | 3.966549   | 1.339715   | 71.51308   | 4.92946   | 3.128638  | 1.436778   |
| 0.93       | 72      |             | 7.577332   | 0.437029   | 19.55778   | 12.6963   | 1.999775  | 0.710962   |
| 0.54       | 343     |             | 0.607498   | 0.641538   | 0.251707   | 0.287852  | 1.539597  | 0.115715   |
| 0.46       | 283     |             | 1.125886   | 2.324485   | 2.259068   | 0.445606  | 0.683977  | 0.643742   |
| 0.91       | 61      |             | 5.337212   | 1.132363   | 15.35605   | 2.512897  | 9.780663  | 1.704734   |
| 1.24       | 64      |             | 8.05127    | 6.065337   | 215.4659   | 10.42297  | 3.190871  | 12.3662    |
| 1.17       | 73      |             | 12.23406   | 3.591231   | 246.6908   | 47.63027  | 8.080584  | 1.829973   |
|            |         |             | 26.55998   | 1.913857   | 2246.9     | 32.4628   | 6.215235  | 1.909086   |
| 1.21       | 89      |             | 3.439425   | 11.13132   | 231.4011   | 93.47093  | 2.991525  | 2.188826   |
| 0.82       | 73      |             | 4.526962   | 0.385928   | 14.42871   | 19.13539  | 7.818978  | 0.670756   |
| 1.35       | 60      |             | 7.593538   | 3.030757   | 174.2235   | 14.37975  | 4.448839  | 7.93033    |
|            |         |             | 0.535226   | 1.064961   | 0.434314   | 1.57377   | 0.985239  | 3.859571   |
| 0.4        | 297     |             | 0.365172   | 0.455991   | 0.842696   | 0.600299  | 0.658247  | 0.286764   |
|            |         |             | 9.008218   | 14.41105   | 534.9411   | 160.5271  | 5.981587  | 2.318516   |
| 1.64       | 94      |             | 3.599245   | 1.436857   | 25.26896   | 2.671797  | 3.418219  | 0.480678   |
| 0.88       | 70      |             | 10.5264    | 1.34671    | 16.05367   | 19.77755  | 2.973867  | 1.812258   |
| 0.51       | 267     |             | 0.88819    | 0.430203   | 0.44266    | 2.244137  | 1.462037  | 1.553416   |

| Kidney_F3 | Kidney_RH | Kidney_TSF | Kidney_PL | Kidney_PL | Kidney_THI | Kidney_PL | Kidney_SYI | Kidney_ET1 |
|-----------|-----------|------------|-----------|-----------|------------|-----------|------------|------------|
| 1.057323  | 1.258691  | 1.217768   | 2.823779  | 0.649582  | 1.28054    | 1.202053  | 0.921469   | 2.141539   |
| 1.139266  | 1.016983  | 0.666185   | 1.850634  | 0.927991  | 1.110789   | 1.173216  | 3.88909    | 0.00345    |
| 2.356474  | 1.35769   | 1.881335   | 1.604092  | 0.898269  | 1.23302    | 2.066932  | 1.088149   | 1.60886    |
| 1.087614  | 1.230023  | 1.428342   | 2.283677  | 1.240926  | 1.570563   | 1.923369  | 2.118398   | 1.812708   |
| 1.933402  | 1.876746  | 1.801265   | 1.93075   | 0.956443  | 1.37209    | 2.786103  | 1.266815   | 1.235826   |
| 1.616027  | 3.104751  | 0.392981   | 1.69354   | 0.347262  | 1.180555   | 14.12524  | 0.536997   | 5.097314   |
| 1         | 1         | 1          | 1         | 1         | 1          | 1         | 1          | 1          |
| 0.40286   | 2.763151  | 0.497363   | 2.888864  | 0.114009  | 0.656635   | 7.658922  | 0.598956   | 4.919259   |
| 0.637245  | 1.597086  | 1.248829   | 1.698231  | 1.083827  | 1.003369   | 1.441698  | 1.545709   | 1.283116   |
| 1.163839  | 5.931259  | 0.499789   | 2.82787   | 0.097415  | 1.278814   | 16.42584  | 0.363401   | 9.970851   |
| 0.828219  | 1.964488  | 0.465636   | 1.665712  | 0.215573  | 0.819921   | 4.156163  | 0.596082   | 2.99914    |
| 1.713227  | 0.440546  | 0.64636    | 0.4145    | 0.581444  | 0.625248   | 0.982766  | 0.426872   | 0.8357     |
| 0.077925  | 0.031252  | 0.098548   | 0.959995  | 0.565425  | 1.454527   | 2.466106  | 1.441182   | 5.481573   |
| 12.25846  | 3.598869  | 0.626026   | 1.513406  | 0.136103  | 0.961505   | 13.04509  | 0.209897   | 9.129408   |
| 1.692363  | 0.251015  | 0.15085    | 0.293549  | 0.004438  | 0.177242   | 1.15352   | 0.019291   | 2.506805   |
| 27.75485  |           | 0.501061   | 0.689292  | 0.197727  | 0.925946   | 18.00772  | 0.045066   | 6.135763   |
| 1.473692  | 0.35686   | 0.763613   | 0.657891  | 0.823481  | 0.939521   | 0.980837  | 0.483249   | 1.103314   |
| 0.742628  | 2.641937  | 0.590959   | 1.26816   | 0.209662  | 1.52954    | 12.15742  | 0.368184   | 11.79939   |
| 2.021936  | 0.345358  | 0.70248    | 0.698905  | 0.84612   | 1.006105   | 0.814066  | 0.47342    | 0.820874   |
| 1.99935   | 1.440256  | 1.728904   | 0.710854  | 0.433919  | 1.56411    | 2.583207  | 1.333733   | 2.771811   |
| 1         | 1         | 1          | 1         | 1         | 1          | 1         | 1          | 1          |
| 0.743612  | 0.273703  | 0.585212   | 0.405551  | 0.280215  | 0.521544   | 1.355343  | 0.79091    | 0.737554   |
| 0.965542  | 1.419117  | 0.368562   | 0.943939  | 0.132544  | 0.918089   | 5.13636   | 0.464501   | 5.873538   |
| 3.668976  | 1.62366   | 1.016004   | 0.639548  | 0.67268   | 0.606868   | 1.068714  | 0.717379   | 2.272039   |
| 1.373564  | 1.239715  | 0.365896   | 0.459823  | 0.071816  | 0.730093   | 1.254842  | 0.540529   | 2.817334   |
| 1.446498  | 1.407074  | 1.864656   | 0.283917  | 0.521307  | 1.078218   | 0.74881   | 0.783938   | 0.489971   |
| 1.020426  | 0.732109  | 0.74284    | 0.826052  | 1.565189  | 0.731088   | 0.820866  | 0.973756   | 1.444527   |
| 1.494786  | 1.539379  | 0.580305   | 1.22718   | 0.281334  | 0.577986   | 0.564426  | 0.5561     | 4.262947   |
| 1.333841  | 2.793273  | 0.791069   | 1.4948    | 0.216151  | 0.82242    | 4.261499  | 1.028907   | 4.324138   |
| 1.023704  | 5.193143  | 1.047845   | 0.644021  | 0.066869  | 2.454119   | 12.87426  | 0.616505   | 5.158453   |
| 18.227    | 6.276613  | 1.317088   | 0.903343  | 0.173572  | 1.425006   | 8.254071  | 0.174486   | 3.48692    |
| 2.138984  | 4.502073  | 1.309968   | 2.802769  | 0.092359  | 1.482929   | 11.85937  | 0.545665   | 2.106023   |
| 1.849663  | 1.935095  | 0.668086   | 1.425753  | 0.317717  | 1.252098   | 3.659673  | 0.853306   | 3.259641   |
| 0.630713  | 3.62897   | 0.476838   | 1.815918  | 0.096868  | 0.869056   | 16.55658  | 0.509779   | 3.960636   |
| 0.898174  | 0.52835   | 1.5214     | 1.722858  | 1.490245  | 1.191348   | 1.189516  | 1.625266   | 0.667588   |
| 0.963784  | 0.29077   | 0.62443    | 0.439815  | 0.291037  | 0.298501   | 0.322227  | 0.718518   | 0.485793   |
| 10.81052  | 6.968803  | 2.031885   | 1.862846  | 0.388899  | 2.19637    | 44.53774  | 0.428191   | 5.376158   |
| 4.026236  | 1.189438  | 1.200352   | 1.159686  | 0.126971  | 0.522373   | 0.907386  | 0.286156   | 2.167945   |
| 4.171494  | 3.934029  | 1.80848    | 2.303274  | 0.150776  | 1.11594    | 1.386724  | 1.240083   | 6.349866   |
| 0.979983  | 1.365916  | 1.346184   | 1.210578  | 0.638901  | 1.367824   | 1.218226  | 1.026952   | 0.692268   |

| Kidney_PT | Kidney_VW | Kidney_PR | Kidney_CD | Kidney_TFF | Kidney_TFF | Kidney_TFF | Kidney_SEL | Kidney_C5 |
|-----------|-----------|-----------|-----------|------------|------------|------------|------------|-----------|
| 1.618082  | 3.578411  | 0.914892  | 5.692106  | 10.98911   | 9.162648   | 3.879646   | 2.410364   | 4.475729  |
| 0.689771  | 3.031839  | 1.024933  | 2.45636   | 5.830498   | 4.678356   | 3.294358   | 5.119811   | 4.79008   |
| 20.15517  | 12.87478  | 18.50614  | 62.74389  | 13.68899   | 16.74009   | 7.582413   | 24.90384   | 28.8247   |
| 1.932857  | 3.704499  | 0.878263  | 7.747412  | 6.90427    | 9.699717   | 2.744013   | 4.90011    | 9.966502  |
| 3.908874  | 4.562978  | 2.171122  | 10.86409  | 2.690986   | 3.198444   | 2.922025   | 3.795133   | 29.52239  |
| 16.90554  | 1.525868  | 87.92412  | 1.879674  | 13.0141    | 7.31785    | 5.386229   | 86.50613   | 46.47293  |
| 1         | 1         | 1         | 1         | 1          | 1          | 1          | 1          | 1         |
| 1.343108  | 0.25401   | 0.999894  | 0.971571  | 0.909511   | 0.166786   | 0.260678   | 14.5582    | 3.633242  |
| 1.149133  | 3.202734  | 1.960042  | 3.025912  | 5.70843    | 19.04964   | 4.776212   | 1.467577   | 8.60211   |
| 69.65625  | 2.774638  | 49.00389  | 21.74304  | 7.498534   | 1.033336   | 9.363383   | 297.1112   | 15.49427  |
| 0.892476  | 1.152249  | 0.415304  | 0.766974  | 0.542381   | 0.641368   | 0.570602   | 2.291713   | 1.341238  |
| 2.201334  | 2.860043  | 1.256756  | 2.304419  | 1.41225    | 0.789347   | 1.011219   | 3.774213   | 1.669259  |
| 14.94644  | 0.549022  | 2.375008  | 1.701399  | 0.332788   | 0.069952   | 0.443939   | 209.2635   | 3.04939   |
| 0.305012  | 0.058495  | 0.78011   | 1.351231  | 0.405097   |            |            | 132.4545   | 2.358206  |
| 9.71698   | 0.17073   | 1.710726  | 0.200592  | 0.16825    | 0.01563    | 0.235575   | 203.5777   | 2.328539  |
| 0.645483  | 0.972269  | 0.747019  | 0.172887  | 0.532885   | 0.58522    | 0.501866   | 2.407997   | 5.005608  |
| 13.47148  | 0.362357  | 0.943442  | 2.402734  | 0.688791   | 0.116292   | 0.816895   | 76.65233   | 2.179344  |
| 0.542088  | 0.54277   | 0.652085  | 0.219051  | 0.624258   | 0.333437   | 0.437656   | 0.991598   | 1.574796  |
| 2.58413   | 3.48513   | 4.484655  | 4.067675  | 1.085865   | 0.567882   | 0.869214   | 62.71843   | 3.593193  |
| 1         | 1         | 1         | 1         | 1          | 1          | 1          | 1          | 1         |
| 0.972512  | 0.780784  | 0.693175  | 0.562732  | 0.656045   | 0.370692   | 0.522011   | 1.88584    | 4.421217  |
| 4.226379  | 0.31727   | 1.278539  | 3.264792  | 0.237774   | 0.120042   | 0.429084   | 49.60468   | 2.166732  |
| 0.159596  | 3.220097  | 0.024355  | 0.843389  | 0.225396   | 0.15232    | 0.896937   | 6.011864   | 0.974537  |
| 3.644582  | 1.545261  | 0.082605  | 0.178603  | 0.284421   | 0.061313   | 0.939236   | 2.537934   | 0.150516  |
| 0.598155  | 6.385696  | 0.113213  | 0.294861  | 0.613223   | 1.575364   | 3.291672   | 0.557653   | 0.207232  |
| 0.871969  | 5.262016  | 0.274602  | 4.674749  | 0.562231   | 1          | 0.184859   | 1.12626    | 1.532326  |
| 0.6305    | 1.001584  | 0.035107  | 0.282064  | 0.715993   | 0.300644   | 2.526779   | 2.475167   | 1.328957  |
| 5.765329  | 3.788974  | 0.192434  | 1.253932  | 1.25172    | 0.71412    | 2.424352   | 22.02519   | 2.267829  |
| 14.27075  | 2.530843  | 0.079257  | 0.341681  | 0.923592   | 0.056179   | 2.09529    | 3.010327   | 0.581103  |
| 44.98771  | 3.771622  | 0.356396  | 6.933409  | 1.367373   | 0.382925   | 1.915303   | 12.801     | 0.870125  |
| 3.846302  | 0.978158  | 0.166436  | 2.35881   | 0.795261   | 0.105139   | 0.476462   | 7.014522   | 0.607962  |
| 1.447856  | 2.510743  | 0.189983  | 0.770692  | 0.235737   | 0.289793   | 2.145779   | 1.816069   | 1.171026  |
| 0.959044  | 3.016033  | 0.138868  | 0.929928  | 0.167691   | 0.052145   | 1.030552   | 8.584739   | 0.252176  |
| 0.528047  | 13.74778  | 0.097398  | 0.875716  | 1.780753   | 0.507452   | 1.965262   | 0.589438   | 0.366859  |
| 0.55933   | 4.677747  | 0.034909  | 0.083931  | 0.947957   | 0.31362    | 1.127393   | 0.451839   | 0.76774   |
| 36.10502  | 2.298122  | 1.498555  | 4.601005  | 0.375025   | 0.101269   | 2.756      | 68.53741   | 0.451712  |
| 0.762018  | 4.316045  | 0.124136  | 0.138187  | 0.607114   | 0.185265   | 0.969611   | 14.72554   | 2.569537  |
| 2.985954  | 1.807629  | 0.225189  | 0.365955  | 0.977111   | 0.473702   | 1.216085   | 10.89623   | 0.938146  |
| 1.146829  | 0.190041  | 0.060422  | 0.213915  | 1.778628   |            | 5.409529   | 0.887895   | 0.652602  |

| Kidney_VE | Kidney_SEF | Kidney_ST | Kidney_OA | Kidney_OA | Kidney_OA | Kidney_OA | Kidney_OA | Kidney_FO | Kidney_MX |
|-----------|------------|-----------|-----------|-----------|-----------|-----------|-----------|-----------|-----------|
| 7.550772  | 0.785563   | 0.970788  | 1.355517  | 1.65738   | 1.129459  | 3.83364   | 1.229824  | 5.938431  |           |
| 5.737226  | 0.7429     | 1.409685  | 1.282556  | 2.457377  | 1.456103  | 2.41842   | 0.830025  | 5.132477  |           |
| 113.3095  | 11.37003   | 9.368323  | 3.290067  | 20.64553  | 10.20125  | 7.570303  | 12.45538  | 27.79988  |           |
| 7.499575  | 1.553318   | 1.672566  | 2.982856  | 4.063455  | 2.254855  | 12.34681  | 2.629598  | 8.345778  |           |
| 14.2351   | 5.75104    | 2.162551  | 3.062379  | 5.804372  | 4.384893  | 50.93285  | 1.726207  | 15.0424   |           |
| 18.74968  | 61.29244   | 22.4392   | 6.101658  | 24.7359   | 31.28116  | 65.00273  | 2.271371  | 377.3544  |           |
| 1         | 1          | 1         | 1         | 1         | 1         | 1         | 1         | 1         |           |
| 1.919823  | 4.030449   | 2.107893  | 2.982706  | 2.702402  | 5.758777  | 16.06108  | 0.179873  | 13.31603  |           |
| 20.42152  | 1.197071   | 3.89831   | 1.514393  | 2.393733  | 2.060194  | 1.923194  | 0.638893  | 9.813186  |           |
| 3.847415  | 72.90743   | 47.0799   | 83.49464  | 27.70148  | 20.69409  | 83.87313  | 5.005311  | 614.4603  |           |
| 1.737274  | 0.863579   | 0.014596  | 1.113297  | 0.433684  | 0.684212  | 0.299975  | 13.32225  | 1.112526  |           |
| 2.630672  | 0.793016   | 1.414524  | 1.630194  | 0.656333  | 3.500858  | 0.84348   | 18.08933  | 1.54928   |           |
| 0.655842  | 8.10844    | 4.487407  | 53.2961   | 3.094854  | 8.616383  | 4.635211  | 253.4276  | 509.9571  |           |
| 1.134609  | 0.095207   | 3.051156  | 3.358378  | 2.57671   | 3.545762  | 3.858326  | 8.401141  | 6.757729  |           |
| 0.274931  | 18.13624   | 4.938547  | 45.42375  | 0.652782  | 6.094467  | 9.99277   | 51.36713  | 57.3555   |           |
| 1.80827   | 0.767276   | 0.879088  | 3.345849  | 0.73639   | 0.472996  | 1.174374  | 19.54166  | 2.903521  |           |
| 0.579752  | 16.5402    | 9.351271  | 45.01132  | 1.390126  | 3.865663  | 4.387363  | 27.58515  | 20.70556  |           |
| 1.113328  | 0.414558   | 1.015427  | 12.42047  | 2.953844  | 1.1787    | 4.335767  | 9.36337   | 2.844199  |           |
| 1.298859  | 4.580058   | 0.838315  | 1.637266  | 0.733265  | 0.786157  | 0.809477  | 44.02319  | 0.923478  |           |
| 1         | 1          | 1         | 1         | 1         | 1         | 1         | 1         | 1         |           |
| 1.521513  | 1.098912   | 0.355783  | 1.348389  | 0.533049  | 0.977021  | 2.827769  | 25.66615  | 0.565964  |           |
| 0.477581  | 33.94944   | 1.898226  | 8.810006  | 4.079782  | 8.014408  | 2.625408  | 12.16294  | 21.48021  |           |
| 0.223136  | 0.445942   | 2.769634  | 5.428658  | 3.69269   | 5.39426   | 5.860832  | 4.214173  | 5.050679  |           |
| 0.154062  | 0.832791   | 2.135341  | 6.074734  | 2.178765  | 4.183174  | 3.263528  | 2.295268  | 8.018011  |           |
| 0.362859  | 0.094668   | 0.572418  | 0.676701  | 0.770857  | 0.709319  | 0.860643  | 2.69994   | 0.881915  |           |
| 0.483791  | 0.96708    | 0.828633  | 1.105317  | 0.96387   | 0.948466  | 1.034855  | 0.628787  | 0.639584  |           |
| 0.546899  | 1.036801   | 2.207552  | 6.590964  | 2.855589  | 3.252454  | 3.586691  | 0.808226  | 3.696715  |           |
| 0.784273  | 0.811855   | 1.84974   | 5.002817  | 3.389983  | 4.176974  | 4.432923  | 2.660776  | 3.924636  |           |
| 0.675913  | 2.131662   | 7.410609  | 55.54061  | 5.851673  | 13.18632  | 10.35894  | 4.641929  | 62.77758  |           |
| 0.43121   | 2.37201    | 6.889722  | 176.232   | 3.451295  | 3.915458  | 7.419172  | 32.70618  | 190.4934  |           |
| 0.413112  | 2.339845   | 1.973598  | 10.77244  | 3.022698  |           | 3.396686  | 2.587232  | 8.747368  |           |
| 0.30964   | 2.363511   | 2.379186  | 4.432782  | 2.374057  | 3.576378  | 4.321529  | 1.168514  | 3.481418  |           |
| 0.274532  | 6.582252   | 1.900199  | 7.367572  | 2.039263  | 3.675006  | 1.682235  | 3.301288  | 34.23755  |           |
| 0.637229  | 0.589871   | 1.310141  | 1.187248  | 1.468511  | 0.89569   | 0.942749  | 0.915309  | 1.893131  |           |
| 0.864737  | 0.128453   | 0.429966  | 0.400504  | 0.460961  | 0.38722   | 0.38133   | 0.425156  | 0.940895  |           |
| 0.367233  | 2.827165   | 3.849412  | 16.8803   | 4.598807  | 6.506636  | 10.53265  | 9.926493  | 43.40602  |           |
| 0.218315  | 3.446665   | 2.971856  | 8.383599  | 4.800325  | 4.216299  | 3.296894  | 2.871544  | 8.281086  |           |
| 0.820601  | 1.959315   | 2.488977  | 7.070918  | 3.804859  | 3.454468  | 5.139757  | 3.087716  | 8.136296  |           |
| 2.06701   | 1.034041   | 1.206807  | 0.904718  | 1.037484  | 1.054334  | 0.966319  | 1.590363  | 1.563517  |           |

| Kidney_IL1 | Kidney_IRF | Kidney_IRF | Kidney_IRF | Kidney_CX1 | Kidney_CX1 | Kidney_IF1 | Kidney_CL1 | Kidney_HA |
|------------|------------|------------|------------|------------|------------|------------|------------|-----------|
| 1.135122   | 3.602059   | 1.644555   | 2.135557   | 1.832207   | 4.503615   | 3.289684   | 3.380111   | 0.243592  |
| 0.436549   | 1.686533   | 1.730471   | 1.225431   | 1.262316   | 1.05348    | 1.316296   | 1.424945   | 0.309917  |
| 4.040917   | 9.686005   | 8.026846   | 11.28967   | 14.10998   | 5.333953   | 10.27407   | 10.4203    | 22.51867  |
| 0.607427   | 4.650833   | 3.93549    | 1.391198   | 9.560688   | 2.615224   | 4.426814   | 6.471454   | 0.572959  |
| 1.071471   | 1.450692   | 3.100944   | 1.511708   | 8.099558   | 8.223731   | 1.567028   | 1.052703   | 2.442122  |
| 5.520664   | 15.43884   | 129.2883   | 22.81724   | 328.0641   | 727.1164   | 14.16893   | 78.09421   | 587.405   |
| 1          | 1          | 1          | 1          | 1          | 1          | 1          | 1          | 1         |
| 0.358944   | 1.889755   | 6.248297   | 0.996596   | 12.9667    | 88.66794   | 1.335729   | 7.047968   | 15.08155  |
| 1.448632   | 3.411605   | 2.722124   | 2.3078     | 3.189412   | 3.923905   | 2.230911   | 7.926777   | 0.183987  |
| 2.81681    | 36.9188    | 68.33384   | 25.01193   | 269.2039   | 1230.576   | 22.5029    | 89.65955   | 37.84671  |
| 1.755665   | 1.08721    | 0.532624   | 0.465317   | 10.62138   | 2.948518   | 1.210731   | 2.093598   | 2.603401  |
| 2.820414   | 1.363016   | 1.394126   | 0.870426   | 2.210994   | 2.670536   | 3.457726   | 3.87261    | 0.896762  |
| 2.151224   | 4.285979   | 9.087297   | 5.210411   | 130.9162   | 1014.821   | 13.3362    | 5.171677   | 11.08423  |
| 1.568388   | 1.445519   | 16.18403   | 0.320952   | 6.697089   | 142.7109   | 6.442898   | 10.4112    | 43.98008  |
| 4.265352   | 6.059991   | 16.09158   | 27.63754   | 1456.449   | 258.6611   | 9.471777   | 8.111839   | 175.2228  |
| 1.414208   | 0.433079   | 0.487169   | 1.49369    | 1.40714    | 1.423081   | 3.534006   | 2.134811   | 4.470602  |
| 5.015081   | 3.880005   | 28.37303   | 1.381057   | 35.01613   | 262.7096   | 22.1466    | 8.075992   | 39.53079  |
| 4.935949   | 0.526246   | 24.59161   | 0.560037   | 1.295844   | 51.99972   | 4.138797   | 1.385961   | 9.77013   |
| 2.333754   | 1.118267   | 0.801261   | 0.821021   | 3.992155   | 3.833995   | 2.062194   | 6.032653   | 11.51217  |
| 1          | 1          | 1          | 1          | 1          | 1          | 1          | 1          | 1         |
| 2.51034    | 0.690341   | 1.536053   | 0.950353   | 0.535558   | 0.783014   | 5.956618   | 3.05474    | 7.658426  |
| 0.969144   | 2.215597   | 8.046736   | 2.53057    | 92.04742   | 53.82385   | 8.8686     | 14.78371   | 136.6838  |
| 0.746381   | 1.430896   | 11.32888   | 0.702857   | 3.048654   | 30.34377   | 0.743885   | 0.315852   | 40.86505  |
| 0.55541    | 1.785752   | 16.40534   | 1.826591   | 6.341074   | 12.54088   | 1.376417   | 1.011957   | 55.46184  |
| 0.730385   | 1.382726   | 0.761613   | 1.18462    | 0.136248   | 0.83431    | 0.421012   | 0.193561   | 2.959964  |
| 0.525959   | 1.264125   | 1.537592   | 0.619315   | 1.488776   | 1.153328   | 0.401946   | 0.231809   | 0.898862  |
| 0.751678   | 1.489504   | 23.87347   | 1.654972   | 1.17298    | 12.43774   | 1.210856   | 1.703059   | 37.36908  |
| 0.54122    | 1.644478   | 10.8668    | 0.657098   | 7.594115   | 43.02949   | 0.569307   | 2.711824   | 21.59044  |
| 0.748664   | 4.088753   | 10.30953   | 1.707854   | 56.25378   | 321.6508   | 2.635084   | 1.512995   | 3.593746  |
| 0.542223   | 10.67984   | 5.066211   | 6.902737   | 45.90221   | 167.0014   | 5.011439   | 3.308253   | 1.224871  |
| 0.730642   | 0.838608   | 4.505553   | 2.33101    | 11.50431   | 50.95279   | 1.49148    | 3.419559   | 81.63431  |
| 0.716748   | 1.267642   | 9.2796     | 1.230836   | 3.908571   | 40.34837   | 0.742297   | 2.250267   | 72.69756  |
| 0.74422    | 4.587812   | 13.89017   | 2.0204     | 7.657814   | 71.69143   | 1.677958   | 7.501712   | 41.54528  |
| 1.229446   | 3.343009   | 1.79173    | 2.280087   | 0.26602    | 0.950608   | 1.640406   | 0.657623   | 0.505857  |
| 1.244154   | 1.765281   | 1.041269   | 1.158905   | 0.1658     | 3.109936   | 1.054382   | 0.673194   | 6.889959  |
| 1.898824   | 4.937506   | 7.627653   | 6.685005   | 93.39046   | 311.1584   | 3.296465   | 7.250023   | 195.5063  |
| 1.040131   | 1.864114   | 14.34431   | 0.987879   | 2.345847   | 31.3259    | 1.264659   | 1.948561   | 111.8757  |
| 1.01998    | 2.265803   | 12.45596   | 1.554711   | 7.80922    | 55.52307   | 2.350681   | 3.243923   | 184.2342  |
| 1.901291   | 3.428522   | 0.650367   | 1.614686   | 0.671693   | 0.867056   | 2.487898   | 4.313905   | 1.112518  |

| Kidney_LCI | Kidney_DD | Kidney_KLF | Lung_ICAM | Lung_SELE | Lung_IL6 | Lung_SOCS | Lung_STAT | Lung_CEMI |
|------------|-----------|------------|-----------|-----------|----------|-----------|-----------|-----------|
| 5.200164   | 5.13886   | 1.40389    | 0.621084  | 0.351414  | 1.152132 | 0.565454  | 0.700751  | 0.486167  |
| 10.73199   | 2.743846  | 0.773832   | 0.651046  | 0.367264  | 1.011383 | 1.042525  | 1.722024  | 0.735775  |
| 28.34154   | 15.258    | 12.35783   | 0.594348  | 0.516205  | 0.89365  | 1.670416  | 0.885036  | 1.093703  |
| 5.300043   | 4.886144  | 1.99551    | 1.394163  | 0.285482  | 0.984176 | 0.704382  | 1.178391  | 0.667091  |
| 10.98367   | 3.334315  | 1.89081    | 0.868789  | 0.258318  | 0.392398 | 1.0206    | 1.249934  | 0.511702  |
| 33197.38   | 17.98816  | 2.912641   | 2.367168  | 13.11634  | 164.8695 | 10.27047  | 3.827644  | 21.51511  |
| 1          | 1         | 1          | 1         | 1         | 1        | 1         | 1         | 1         |
| 11547.12   | 2.664411  | 0.447268   | 11.39956  | 36.31614  | 101.9544 | 6.781499  | 1.291817  | 19.03781  |
| 9.348403   | 4.260629  | 1.335439   | 1.019757  | 0.508402  | 0.808003 | 0.702066  | 0.556043  | 0.771481  |
| 59505.17   | 24.32259  | 3.090663   | 2.716508  | 9.982392  | 326.9565 | 16.12985  | 2.446129  | 16.06376  |
|            |           |            | 6.629145  | 20.52717  | 71.38962 | 6.175641  | 1.363394  | 14.11264  |
| 0.345695   | 0.592299  | 0.374333   | 0.958377  | 2.14425   | 0.432103 | 1.43424   | 0.571679  | 0.49359   |
| 0.749282   | 0.855562  | 0.857116   | 1.154005  | 1.058821  | 0.706892 | 1.397534  | 1.083612  | 0.999717  |
| 2739.989   | 14.44044  | 0.815355   | 7.298854  | 18.59433  | 259.349  | 36.65689  | 4.251097  | 15.23139  |
| 292.9192   | 1.925682  | 0.578188   | 30.41739  | 1.727627  | 7.055725 |           |           |           |
| 1720.834   | 4.228446  | 0.820591   | 2.017122  | 39.2774   | 926.9563 | 19.80015  | 2.906463  | 15.37839  |
| 0.242277   | 1.255387  | 0.60743    | 0.948037  | 2.079197  | 0.942379 | 1.39885   | 1.014777  | 0.588622  |
| 6446.186   | 6.24284   | 1.396912   | 5.362327  | 31.50528  | 214.6922 | 12.05236  | 1.992884  | 33.26403  |
| 7.403231   | 2.485056  | 0.394313   | 1.865343  | 1.174215  | 1.168124 | 1.478285  | 1.765224  | 1.072512  |
| 118.4285   | 0.813299  | 1.060428   | 1.047213  | 3.776918  | 1.270384 | 3.267707  | 2.022249  | 2.336057  |
| 1          | 1         | 1          | 1         | 1         | 1        | 1         | 1         | 1         |
| 1.300479   | 0.843965  | 1.277393   | 2.353416  | 7.210053  | 1.90512  | 3.472316  | 1.101267  | 1.583726  |
| 2442.109   | 1.918481  | 1.162541   | 2.353416  | 7.210053  | 103.2129 | 3.472316  | 2.433456  | 14.84042  |
| 227.8639   | 0.853746  | 0.550768   | 4.059203  | 51.37915  | 145.9443 | 6.119209  | 2.850642  | 12.69425  |
| 267.6129   | 2.429125  | 0.468264   | 2.247911  | 36.91323  | 96.67953 | 9.053534  | 2.333404  | 14.61675  |
| 0.125777   | 1.55645   | 0.698151   | 1.169524  | 1.686078  | 2.219355 | 3.263237  | 1.243452  | 2.583754  |
| 0.52939    | 1.404186  | 0.703559   | 0.973357  | 1.505768  | 0.936536 | 1.409803  | 1.563828  | 0.507164  |
| 370.5148   | 0.665032  | 0.453514   | 5.613391  | 100.4459  | 54.23271 | 3.585972  | 2.40997   | 21.20079  |
| 612.128    | 0.427278  | 0.386843   | 3.15277   | 20.07462  | 84.74296 | 3.98934   | 1.741543  | 9.029514  |
| 459.9302   | 3.066318  | 1.371643   | 2.278363  | 20.13014  | 335.0484 | 11.3093   | 2.340049  | 24.15548  |
| 404.695    | 5.192288  | 1.304132   | 3.501664  | 59.46798  | 5087.134 | 32.66111  | 5.388775  | 52.90717  |
| 444.5444   | 0.977295  | 0.62469    | 2.461637  | 36.15207  | 83.57891 | 4.834408  | 1.173409  | 7.262508  |
| 665.3206   | 1.149242  | 0.258841   | 5.492868  | 51.89752  | 76.59388 | 7.276247  | 2.739948  | 9.899358  |
| 2050.22    | 2.166876  | 0.416342   | 5.665259  | 36.57416  | 216.3096 | 22.5418   | 4.089543  | 51.44162  |
| 0.767225   | 3.359108  | 1.376708   | 0.64533   | 1.231414  | 0.59554  | 1.618408  | 1.464158  | 0.779468  |
| 0.821296   | 0.627104  | 0.456728   | 0.837679  | 0.974851  | 0.873268 | 1.228944  | 1.264836  | 0.89023   |
| 1601.139   | 1.445369  | 0.249562   | 1.374992  | 10.80178  | 912.7319 | 16.63748  | 5.011048  | 31.02326  |
| 580.7737   | 1.782308  | 0.265786   | 3.512876  | 23.65379  | 23.71977 | 5.756026  | 2.344706  | 18.24352  |
| 746.8935   | 1.032717  | 0.601628   | 3.311173  | 40.91779  | 130.6038 | 6.115723  | 1.565559  | 26.28923  |
| 1.888965   | 1.503687  | 1.421345   | 0.438912  | 0.664113  | 1.067764 | 0.709319  | 0.639457  | 1.971748  |



| Lung_F3  | Lung_RHOI | Lung_TSP1 | Lung_PLAT | Lung_PLAU | Lung_THBI | Lung_PLAU | Lung_PTGS | Lung_VWF |
|----------|-----------|-----------|-----------|-----------|-----------|-----------|-----------|----------|
| 1.008212 | 0.429947  | 0.548266  | 0.761477  | 0.97766   | 0.691595  | 0.624948  | 1.047059  | 0.807341 |
| 1.00533  | 2.077038  | 0.830573  | 1.082035  | 0.942485  | 0.902756  | 0.904664  | 1.61296   | 2.048201 |
| 1.942887 | 0.691314  | 1.136824  | 1.362688  | 0.611988  | 0.879946  | 1.098489  | 1.827451  | 0.836768 |
| 0.982752 | 1.25269   | 1.011491  | 0.844521  | 0.639872  | 0.578091  | 0.563315  | 2.623861  | 2.134258 |
| 0.623162 | 0.87686   | 0.573215  | 1.330934  | 0.469761  | 1.468612  | 1.244162  | 1.11282   | 1.625369 |
| 1.959117 | 3.54081   | 0.848389  | 6.961253  | 0.129693  | 0.14522   | 6.289172  | 2.905875  | 0.147471 |
| 1        | 1         | 1         | 1         | 1         | 1         | 1         | 1         | 1        |
| 0.979284 | 1.3992    | 0.61784   | 6.41223   | 0.593206  | 0.161156  | 2.622702  | 8.918183  | 0.296829 |
| 0.877194 | 0.809876  | 0.877147  | 0.60083   | 0.344317  | 0.570867  | 0.452686  | 1.900672  | 1.249303 |
| 1.178513 | 3.735182  | 0.684173  | 6.566507  | 0.228906  | 0.132421  | 3.359537  | 2.746183  | 0.163805 |
| 1.108493 | 1.840734  | 0.643267  | 9.020696  | 0.100843  | 0.207836  | 1.978521  | 3.568797  | 0.235574 |
| 0.569387 | 0.602406  | 0.922521  | 0.514921  | 0.472801  | 0.729099  | 0.611973  | 1.551305  | 0.960865 |
| 0.634117 | 0.940477  | 1.851745  | 0.842927  | 0.812816  | 1.354592  | 1.047163  | 1.061734  | 0.837064 |
| 1.038079 | 6.049721  | 2.918542  | 4.769618  | 0.449043  | 0.144033  | 7.573677  | 2.762837  | 0.343502 |
| 0.299648 | 0.468684  | 1.535858  | 2.080363  | 0.373625  | 0.241998  | 1.221207  | 1.202141  | 0.323466 |
| 1.699282 | 3.490968  | 5.122838  | 3.447943  | 0.310968  | 0.177401  | 9.580325  | 1.534121  | 0.162718 |
| 0.690255 | 0.806792  | 1.209367  | 1.01179   | 1.020558  | 1.103705  | 0.735846  | 0.985028  | 0.842836 |
| 0.773889 | 1.701685  | 0.993323  | 6.436819  | 0.631449  | 0.191044  | 4.639785  | 7.229181  | 0.546705 |
| 0.724722 | 1.26436   | 1.130966  | 1.073734  | 2.601537  | 1.839934  | 1.426636  | 1.978545  | 1.888172 |
| 0.655082 | 1.712002  | 2.706557  | 1.672171  | 0.24149   | 0.733284  | 1.486933  | 1.23688   | 2.499035 |
| 1        | 1         | 1         | 1         | 1         | 1         | 1         | 1         | 1        |
| 0.853566 | 1.164457  | 1.693874  | 1.064179  | 1.29687   | 1.090616  | 0.937516  | 2.438954  | 1.141362 |
| 0.74122  | 1.860151  | 0.82018   | 8.720695  | 0.728309  | 0.238184  | 3.457411  | 3.428117  | 0.460046 |
| 0.858794 | 2.784236  | 0.841584  | 5.974723  | 0.863941  | 0.474451  | 2.161019  | 5.058818  | 0.342742 |
| 1.356004 | 3.495221  | 0.97124   | 7.417441  | 0.376587  | 0.258369  | 3.997975  | 3.607997  | 0.34789  |
| 1.234751 | 1.755106  | 2.505522  | 0.613768  | 1.0589    | 0.964774  | 1.850414  | 1.787655  | 1.517994 |
| 2.040473 | 1.820025  | 1.107402  | 0.769225  | 1.272602  | 2.088113  | 0.970852  | 2.054294  | 2.279332 |
| 1.879406 | 3.366513  | 1.754259  | 15.94382  | 0.577034  | 0.460654  | 4.610916  | 3.138655  | 0.487414 |
| 1.008477 | 2.226862  | 0.621196  | 7.231145  | 0.441708  | 0.238321  | 2.279593  | 2.586348  | 0.220932 |
| 1.212091 | 2.659614  | 0.919301  | 14.76665  | 0.321156  | 0.273647  | 5.582337  | 3.948264  | 0.398476 |
| 3.920089 | 14.45242  | 7.478782  | 12.87351  | 0.574642  | 0.367996  | 16.63485  | 9.929505  | 0.323448 |
| 0.969442 | 1.154742  | 0.594398  | 11.17564  | 0.305123  | 0.22377   | 4.272135  | 3.072529  | 0.176596 |
| 1.889521 | 1.769551  | 0.948453  | 9.920248  | 1.157422  | 0.445757  | 4.129828  | 4.008709  | 0.459137 |
| 4.152373 | 3.761207  | 1.337263  | 24.25441  | 0.883023  | 0.391402  | 8.809086  | 3.770807  | 0.242346 |
| 1.965699 | 1.618109  | 1.257743  | 4.436924  | 1.338017  | 1.997367  | 1.726844  | 0.874597  | 1.657853 |
| 1.460904 | 0.84363   | 0.727117  | 3.270207  | 0.581408  | 1.23836   | 1.276666  | 0.854441  | 1.531053 |
| 4.864892 | 3.848367  | 2.066156  | 10.66873  | 0.469997  | 0.146534  | 10.81498  | 2.871971  | 0.100756 |
| 1.264402 | 1.527847  | 1.754885  | 8.08821   | 0.388881  | 0.504043  | 2.811267  | 2.395303  | 0.442612 |
| 0.826384 | 1.558415  | 1.653277  | 7.887486  | 0.278642  | 0.399146  | 3.369634  | 1.633756  | 0.220406 |
| 0.490082 | 0.549443  | 0.903015  | 1.300009  | 0.785792  | 0.478901  | 1.030023  | 0.486785  | 0.438725 |

| Lung_PROC | Lung_CD44 | Lung_TFPIA | Lung_TFPIE | Lung_TFPIC | Lung_SELP | Lung_C5AR | Lung_VEGF | Lung_SERP |
|-----------|-----------|------------|------------|------------|-----------|-----------|-----------|-----------|
| 1.583058  | 1.139176  | 1.488493   | 1.403676   | 1.529417   | 0.31811   | 0.383304  | 0.20945   | 0.435087  |
| 1.637281  | 0.904038  | 1.717188   | 1.278593   | 1.577407   | 1.578212  | 0.482245  | 1.152854  | 0.500959  |
| 1.265927  | 1.919529  | 1.081591   | 1.149887   | 1.003072   | 1.4969    | 4.88721   | 0.396189  | 0.679428  |
| 1.361604  | 0.731589  | 1.779      | 1.512112   | 1.415588   | 3.958487  | 0.928404  | 2.159048  | 0.626927  |
| 1.02966   | 0.621874  | 1.614524   | 1.551883   | 1.038414   | 0.925527  | 0.8601    | 0.820833  | 0.908807  |
| 13.47138  | 1.494245  | 1.089698   | 0.284942   | 1.350779   | 98.9173   | 7.596611  | 0.46498   | 20.83983  |
| 1         | 1         | 1          | 1          | 1          | 1         | 1         | 1         | 1         |
| 7.495997  | 0.816356  | 0.743481   | 0.213531   | 0.77069    | 43.78746  | 7.474888  | 0.150072  | 19.71226  |
| 0.924786  | 1.823337  | 0.944689   | 0.864337   | 0.7917     | 0.953951  | 0.993344  | 0.315472  | 0.599222  |
| 5.834948  | 0.992532  | 0.76359    | 0.103945   | 0.955972   | 50.02585  | 6.772746  | 0.179954  | 6.457361  |
| 5.643699  | 0.892716  | 0.858795   | 0.324501   | 0.756201   | 17.51195  | 9.497119  | 0.198239  | 11.0948   |
|           | 0.932581  | 1.230682   | 1.170234   | 0.992928   | 1.955491  | 1.010247  | 0.667893  | 1.027792  |
|           | 1.2117    | 1.373404   | 1.158135   | 0.7968     | 1.824415  | 0.64335   | 1.031661  | 1.674551  |
|           | 1.741777  | 0.578324   | 0.197301   | 0.676662   | 55.39461  | 12.49747  | 0.645716  | 11.2436   |
|           | 0.641924  | 0.965449   | 0.610126   | 0.649485   | 24.70005  | 1.716076  | 0.200011  | 20.99388  |
|           | 1.992465  | 0.579278   | 0.132602   | 0.549259   | 106.2707  | 8.342281  | 0.264151  | 21.19955  |
|           | 0.761556  | 1.058128   | 0.973591   | 0.977885   | 2.95124   | 0.57285   | 0.740254  | 1.245793  |
|           | 1.082374  | 0.646769   | 0.177154   | 0.612451   | 23.48229  | 7.221186  | 0.689398  | 23.77842  |
|           | 0.621869  | 0.816403   | 0.952249   | 0.822702   | 0.913389  | 2.091222  | 1.150515  | 1.04153   |
|           | 0.730355  | 1.343445   | 0.801787   | 1.147498   | 5.306311  | 3.270944  | 0.772779  | 2.235449  |
|           | 1         | 1          | 1          | 1          | 1         | 1         | 1         | 1         |
|           | 1.757065  | 0.780746   | 0.804772   | 0.736591   | 0.960045  | 1.194037  | 1.052191  | 1.091321  |
|           | 1.543663  | 0.89433    | 0.287474   | 0.886158   | 27.47807  | 13.0911   | 0.742827  | 26.42723  |
| 8.483696  | 1.180014  | 1.1519     | 0.405851   | 0.95352    | 34.30583  | 1.394397  | 0.167299  | 25.73082  |
| 9.105125  | 2.019425  | 0.615625   | 0.324689   | 0.720989   | 43.91123  | 3.741908  | 0.106999  | 23.47194  |
| 2.563212  | 3.334646  | 1.304417   | 0.785299   | 1.523763   | 0.798449  | 0.147588  | 0.661616  | 2.017196  |
| 1.5947    | 3.334002  | 2.40473    | 1.392206   | 2.128683   | 1.603543  | 1.58374   | 1.418535  | 1.667049  |
| 13.41694  | 3.043924  | 0.70477    | 0.564896   | 1.052556   | 24.63421  | 10.30214  | 0.459601  | 61.01154  |
| 9.958829  | 1.616175  | 1.514261   | 0.450622   | 1.071138   | 45.77661  | 0.871604  | 0.337727  | 25.49211  |
| 36.46589  | 3.806922  | 0.869945   | 0.117478   | 0.582321   | 81.02728  | 5.459564  | 0.257797  | 76.54726  |
| 18.46905  | 0.38287   | 0.19484    | 0.180944   | 1.211379   | 102.9318  | 1.574685  | 0.172506  | 31.79112  |
| 31.32646  | 0.607778  | 1.069438   | 0.129185   | 0.166011   | 156.2101  | 6.911668  | 0.305012  | 45.75123  |
| 10.62479  | 2.125462  | 0.748717   | 0.430124   | 1.456805   | 44.06564  | 2.618978  | 0.495431  | 30.35386  |
| 28.2467   | 3.359946  | 1.188439   | 0.160832   | 0.894179   | 151.8738  | 2.67823   | 0.756111  | 23.71455  |
| 4.692415  | 3.319743  | 2.13789    | 1.338492   | 0.903074   | 1.336593  | 1.945005  | 1.818039  | 5.062488  |
| 1.556427  | 1.392251  | 1.933491   | 1.381818   | 1.076996   | 1.385561  | 1.26145   | 0.465198  | 1.116888  |
| 15.99673  | 2.732967  | 0.820032   | 0.233229   | 1.29474    | 68.86903  | 0.394697  | 0.383298  | 29.8431   |
| 5.700794  | 1.035634  | 1.565117   | 0.650633   | 0.690651   | 19.75798  | 0.971496  | 0.07677   | 23.73079  |
| 4.759914  | 0.704002  | 0.414215   | 0.535238   | 0.633364   | 6.011435  | 3.752798  | 0.1961    | 25.77914  |
| 0.627077  | 0.29994   | 0.415847   | 0.718284   | 0.469774   | 0.623619  | 0.631417  | 0.704952  | 0.599863  |

| Lung_STAT | Lung_OAS1 | Lung_OAS2 | Lung_OAS3 | Lung_OAS4 | Lung_FOS | Lung_MX1 | Lung_IL18 | Lung_IRF1 |
|-----------|-----------|-----------|-----------|-----------|----------|----------|-----------|-----------|
| 0.813316  | 0.64326   | 0.693336  | 0.948527  | 0.424692  | 0.630025 | 1.009758 | 1.250724  | 1.065526  |
| 1.074643  | 1.532526  | 2.256412  | 1.713796  | 1.736932  | 0.943891 | 2.221763 | 1.246571  | 1.045307  |
| 0.807384  | 1.053378  | 1.414791  | 1.507059  | 1.643338  | 0.835492 | 0.664995 | 1.534024  | 0.99487   |
| 1.352835  | 1.017932  | 1.094384  | 1.329647  | 0.835512  | 0.960296 | 1.271511 | 1.033523  | 1.44707   |
| 1.161819  | 2.181376  | 2.582326  | 1.740152  | 1.589219  | 0.700275 | 0.828816 | 1.156067  | 1.213614  |
| 3.172866  | 9.067052  | 2.839938  | 4.210862  | 5.823419  | 1.38096  | 9.182159 | 0.639519  | 1.832912  |
| 1         | 1         | 1         | 1         | 1         | 1        | 1        | 1         | 1         |
| 2.544314  | 9.177183  | 3.909525  | 4.201304  | 10.85614  | 0.624529 | 5.241675 | 0.571189  | 1.782514  |
| 0.762441  | 0.59618   | 0.709209  | 0.795743  | 0.459252  | 0.789178 | 0.68815  | 1.13331   | 0.860677  |
| 4.408499  | 22.71788  | 5.681791  | 5.547926  | 8.546993  | 1.835735 | 31.35689 | 0.433555  | 3.777702  |
| 2.560779  | 11.07217  | 4.006155  | 5.391622  | 10.69505  | 0.329479 | 5.718718 | 0.815578  | 1.629474  |
| 1.041738  | 1.295844  | 1.785994  | 1.054683  | 1.356709  | 3.365325 | 0.743469 | 0.902196  | 1.064441  |
| 1.267642  | 1.138456  | 1.638912  | 1.390589  | 1.2292    | 2.208429 | 0.753604 | 0.712555  | 1.054762  |
| 5.719489  | 93.39447  | 9.094917  | 7.075874  | 15.68993  | 10.86526 | 79.95781 | 0.551978  | 6.602616  |
| 2.82326   | 9.088943  | 5.379084  | 5.50712   | 9.450951  | 3.809797 | 5.916387 | 0.79396   | 1.496876  |
| 4.333521  | 131.2546  | 7.69941   | 5.129906  | 20.25966  | 13.14314 | 64.01015 | 0.44895   | 3.540843  |
| 1.027147  | 1.13986   | 1.414853  | 1.261367  | 0.644719  | 2.917339 | 1.043987 | 0.950819  | 1.020959  |
| 3.78778   | 18.9789   | 4.156272  | 7.635437  | 16.78108  | 7.334597 | 14.49344 | 0.709412  | 2.594818  |
| 1.476049  | 2.306443  | 2.096942  | 1.94222   | 2.35402   | 2.267314 | 2.726413 | 1.58225   | 0.987344  |
| 0.926214  | 0.923538  | 1.812454  | 1.46787   | 3.095451  | 6.724788 | 0.572032 | 0.550571  | 1.07672   |
| 1         | 1         | 1         | 1         | 1         | 1        | 1        | 1         | 1         |
| 0.873955  | 1.522014  | 1.167155  | 1.165177  | 0.863157  | 3.479343 | 0.948364 | 1.373996  | 0.80459   |
| 4.481532  | 19.77959  | 7.107743  | 7.569893  | 29.7575   | 5.799186 | 8.398786 | 0.599967  | 2.081455  |
| 2.921612  | 12.84233  | 5.823241  | 7.909149  | 9.480604  | 6.301278 | 5.705438 | 0.990302  | 1.540872  |
| 3.649717  | 12.40583  | 5.315951  | 6.794009  | 5.344318  | 4.548935 | 6.28394  | 0.579153  | 1.34016   |
| 2.702638  | 2.198475  | 2.613205  | 2.898486  | 1.644326  | 5.46794  | 3.573095 | 1.68096   | 0.641092  |
| 1.772227  | 1.987448  | 1.943083  | 1.444453  | 1.596188  | 1.991884 | 1.800188 | 1.59336   | 0.848926  |
| 5.890732  | 14.47093  | 7.468299  | 10.83565  | 3.588377  | 3.624709 | 9.412426 | 1.072252  | 1.086151  |
| 3.368383  | 7.769434  | 4.56704   | 6.148382  | 3.992221  | 2.391783 | 5.548194 | 0.611753  | 1.011892  |
| 43.58324  | 160.3653  | 41.54739  | 52.76907  | 9.023493  | 28.1565  | 94.24741 | 1.677455  | 2.971029  |
| 16.60374  | 233.8148  | 17.62383  | 13.41633  | 13.26843  | 27.27057 | 172.8386 | 0.908543  | 7.830647  |
| 5.18147   | 11.8372   | 9.632193  | 8.945507  | 4.045116  | 7.454573 | 9.171198 | 1.071553  | 0.830699  |
| 4.771574  | 5.21778   | 5.056478  | 7.621237  | 4.105426  | 2.056078 | 3.32813  | 1.128657  | 1.029404  |
| 10.348    | 18.98841  | 5.998106  | 10.53161  | 6.68828   | 5.371114 | 27.06444 | 1.114389  | 2.587696  |
| 8.346507  | 4.803925  | 7.607415  | 6.389306  | 1.631023  | 4.751709 | 1.683632 |           | 1.177606  |
| 2.347981  | 2.627419  | 2.430218  | 2.583006  | 0.534787  | 1.183345 | 1.552645 | 1.273918  | 0.697299  |
| 2.768274  | 13.41105  | 3.042274  | 4.505044  | 9.655059  | 6.562041 | 12.24573 | 0.368553  | 2.77076   |
| 3.707968  | 10.66287  | 5.742356  | 7.340282  | 8.679844  | 1.992261 | 5.793887 | 0.903641  | 1.204185  |
| 2.181145  | 7.340388  | 4.62071   | 4.563509  | 4.782598  | 1.603879 | 3.468245 | 0.42747   | 1.239861  |
| 0.564262  | 0.503158  | 0.514646  | 0.692304  | 0.626493  | 0.502037 | 0.555498 | 0.627604  | 1.17796   |

| Lung_IRF7 | Lung_IRF8 | Lung_CXCL | Lung_CXCL | Lung_IFIH1 | Lung_DDX5 | Lung_KLF2 | Liver_ICAM | Liver_SELE |
|-----------|-----------|-----------|-----------|------------|-----------|-----------|------------|------------|
| 0.912463  | 0.911668  | 0.317822  | 3.505235  | 1.204914   | 0.899921  | 0.750718  | 1.097665   | 1.142831   |
| 1.427107  | 1.215659  | 0.65303   | 2.044911  | 1.383065   | 1.158654  | 0.611308  | 0.668434   | 0.967041   |
| 0.872648  | 0.621996  | 1.03921   | 1.081554  | 1.053674   | 0.984547  | 1.094319  | 1.015899   | 1.36882    |
| 1.252294  | 1.174271  | 0.282102  | 1.22795   | 1.434801   | 1.375432  | 0.985508  | 1.363407   | 0.439799   |
| 1.524784  | 0.791593  | 1.090819  | 0.906489  | 1.351816   | 1.323575  | 0.844685  | 0.852297   | 0.753091   |
| 12.01161  | 1.418695  | 30.1209   | 593.5298  | 2.588578   | 1.622529  | 0.760578  | 7.224862   | 1.91586    |
| 1         | 1         | 1         | 1         | 1          | 1         | 1         | 1          | 1          |
| 9.393189  | 0.808105  | 38.65234  | 301.0334  | 2.228809   | 1.938172  | 0.629909  | 1.547331   | 0.960612   |
| 0.677468  | 0.77829   | 0.380347  | 0.478701  | 0.99137    | 0.789661  | 0.627549  | 4.721572   | 0.933415   |
| 17.31768  | 1.939226  | 40.66857  | 1692.092  | 3.659878   | 2.326459  | 0.783172  | 7.963836   | 1.378339   |
| 10.75717  | 0.71524   | 25.25159  | 415.7267  | 2.522673   | 1.811711  | 0.507417  | 3.649977   | 1.335602   |
| 0.745183  | 1.21742   | 0.424843  | 0.661389  | 1.417546   | 1.81726   | 1.056556  | 1.354365   | 0.484804   |
| 0.865455  | 1.086826  | 0.812863  | 0.810433  | 1.47726    | 1.785408  | 0.735132  | 1.962121   | 0.573426   |
| 15.89637  | 3.477641  | 518.3292  | 1847.898  | 5.053892   | 4.314661  | 2.532123  | 15.22397   | 6.412264   |
| 15.65428  |           | 166.8273  | 156.0345  | 2.637564   | 2.487741  | 0.409979  | 7.88156    | 2.319015   |
| 20.99388  | 3.158411  | 2437.928  | 1852.861  | 4.257813   | 3.328537  | 1.690183  | 15.10438   | 5.131249   |
| 1.471406  | 1.091656  | 1.390174  | 0.596445  | 1.169229   | 1.293403  | 0.535123  | 1.013136   | 1.093706   |
| 16.52967  | 1.844535  | 258.2695  | 1688.293  | 3.052177   | 2.328364  | 3.826819  | 10.61421   | 1.17318    |
| 2.738016  | 1.165759  | 5.636355  | 1.359853  | 1.431005   | 1.217544  | 2.834124  | 2.251394   | 0.290246   |
| 0.87147   | 0.703151  | 10.2078   | 0.48206   | 1.140128   | 1.081759  | 1.673456  | 0.327189   | 0.627676   |
| 1         | 1         | 1         | 1         | 1          | 1         | 1         | 1          | 1          |
| 1.054567  | 0.877805  | 2.420026  | 0.700314  | 0.921972   | 0.888898  | 1.607908  | 1.009709   | 0.171895   |
| 11.93393  | 1.44693   | 144.3432  | 838.3742  | 3.811409   | 3.884219  | 4.971886  | 4.848416   | 0.981759   |
| 19.12926  | 1.164591  | 4.8367    | 53.17853  | 2.408311   | 2.162445  | 5.336936  | 3.757301   | 1.70472    |
| 15.6283   | 1.219753  | 8.425333  | 36.16973  | 1.974848   | 1.637168  | 0.683755  | 2.117994   | 3.093067   |
| 1.092875  | 0.663626  | 0.658403  | 1.023685  | 0.826588   | 0.738696  | 1.153112  | 0.956435   | 1.958879   |
| 1.067235  | 0.813844  | 1.787118  | 1.35138   | 0.75305    | 0.807878  | 0.921554  | 1.383957   | 0.327738   |
| 11.65716  | 0.861678  | 2.543722  | 12.64766  | 1.734281   | 1.403825  | 2.390058  | 5.975232   | 2.03219    |
| 11.93081  | 0.95041   | 5.577867  | 32.3697   | 1.661967   | 1.110118  | 0.761932  | 5.771125   | 4.41065    |
| 10.45852  | 2.954121  | 29.01146  | 89.4303   | 4.873122   | 2.938054  | 0.053263  | 22.49837   | 15.54818   |
| 6.939723  | 6.942476  | 77.18795  | 257.2242  | 8.213913   | 6.842198  | 7.791137  | 29.32253   | 50.06773   |
| 7.349691  | 1.193599  | 16.08654  | 27.97721  | 1.749422   | 1.271273  | 4.375321  | 4.469591   | 2.84844    |
| 12.46221  | 1.05063   | 2.342678  | 12.70522  | 1.508001   | 1.270323  | 0.631734  | 1.373827   | 2.458365   |
| 14.70265  | 2.125993  | 20.32246  | 94.9036   | 2.799996   | 2.455555  | 8.897173  | 10.17732   | 3.595288   |
| 1.59191   | 0.986201  | 0.370543  | 1.204003  | 1.181574   | 1.170189  | 6.945358  | 1.236005   | 2.50345    |
| 0.967372  | 0.689389  | 0.657346  | 1.370978  | 0.809893   | 0.627895  | 3.42635   | 1.236628   | 0.634857   |
| 13.88376  | 4.624707  | 44.12656  | 117.5193  | 2.337866   | 1.798032  | 6.138773  | 21.39476   | 7.586534   |
| 15.9829   | 1.049052  | 3.99621   | 14.26988  | 1.507413   | 1.632334  | 4.710817  | 5.65675    | 2.21195    |
| 12.12261  | 0.893291  | 3.891708  | 15.36225  | 1.633958   | 1.581729  | 2.415854  | 1.616502   | 3.466331   |
| 0.937001  | 1.228737  | 0.55956   | 0.739984  | 1.327933   | 1.237811  | 1.085123  | 0.722566   | 3.051216   |

| Liver_IL6 | Liver_SOCS | Liver_STAT | Liver_CEMII | Liver_F3 | Liver_RHOI | Liver_TSP1 | Liver_PLAT | Liver_PLAU |
|-----------|------------|------------|-------------|----------|------------|------------|------------|------------|
| 0.345844  | 0.973153   | 0.498498   | 0.194902    | 4.942041 | 2.704289   | 1.032015   | 1.516717   | 1.551397   |
| 1.025394  | 1.698094   | 1.259763   | 1.750906    | 1.693952 | 1.168934   | 2.00828    | 1.229924   | 1.517022   |
| 0.681423  | 1.602833   | 2.706507   | 0.231667    | 1.348059 | 3.218861   | 0.817259   | 0.345934   | 0.199947   |
| 1.629294  | 0.922549   | 1.174951   | 0.191519    | 3.293104 | 2.366473   | 1.580296   | 0.267519   | 0.421906   |
| 0.689398  | 0.29362    | 0.82454    | 1.580375    | 0.767496 | 1.97057    | 1.700821   | 0.750612   | 1.103284   |
| 13.68776  | 30.43622   | 2.087857   | 52.18084    | 0.418558 | 0.878534   | 1.806806   | 2.614432   | 0.524168   |
| 1         | 1          | 1          | 1           | 1        | 1          | 1          | 1          | 1          |
| 1.030334  | 0.963092   | 1.318332   | 1.918909    | 0.68318  | 1.47596    | 0.73878    | 1.954949   | 1.290005   |
| 5.214167  | 12.14035   | 1.342916   | 28.54234    | 0.376163 | 0.641533   | 0.878804   | 1.318653   | 0.741147   |
| 14.3275   | 28.93313   | 2.071137   | 64.56097    | 0.564757 | 0.695973   | 1.204706   | 2.331999   | 0.388934   |
| 2.381299  | 9.644336   | 0.735658   | 4.586912    | 0.164369 | 0.379888   | 0.356745   | 0.318337   | 0.117652   |
| 2.466546  | 8.825814   | 1.906188   | 2.116284    | 0.531025 | 1.470634   | 0.264304   | 2.145209   | 0.36268    |
| 2.817756  | 9.323619   | 2.148561   | 4.818077    | 0.690958 | 2.869299   | 1.274111   | 1.591008   | 0.820385   |
| 73.4939   | 86.18866   | 2.803788   | 57.76101    | 0.649423 | 0.766666   | 2.701127   | 0.709944   | 0.583698   |
| 5.607961  | 30.83598   | 1.682867   | 2.234066    | 0.484862 | 1.333947   | 0.781284   | 5.407856   | 1.25241    |
| 128.3318  | 88.44058   | 3.663703   | 68.40126    | 1.081533 | 1.324308   | 8.057616   | 1.748015   | 0.406642   |
| 0.912531  | 2.806002   | 1.055568   | 1.502207    | 1.135157 | 1.143413   | 0.320799   | 1.234958   | 0.478674   |
| 104.0114  | 62.02085   | 1.702184   | 47.26019    | 0.438919 | 1.024179   | 1.388473   | 1.177717   | 0.523193   |
| 1.253116  | 1.424169   | 1.136653   |             | 1.174549 | 1.264673   | 0.442923   | 1.107198   | 2.181979   |
| 1.211601  | 19.06834   | 1.199058   | 38.54589    | 0.384725 | 0.777456   | 1.024902   | 0.676765   | 0.434813   |
| 1         | 1          | 1          | 1           | 1        | 1          | 1          | 1          | 1          |
| 1.141016  | 3.895996   | 1.103864   | 0.895449    | 0.957496 | 1.075213   | 0.269872   | 1.433321   | 0.542506   |
| 17.50751  | 31.64454   | 0.848809   | 6.489343    | 0.132671 | 0.465951   | 0.366681   | 0.976477   | 0.133829   |
| 4.776257  | 6.90979    | 0.891108   | 0.250317    | 0.389862 | 0.453756   | 1.83208    | 1.358644   | 0.251944   |
| 2.619996  | 9.86349    | 1.379249   | 1.97013     | 0.227177 | 0.311517   | 2.30944    | 1.353017   | 0.619648   |
| 1.311282  | 1.954286   | 1.226506   | 1.841966    | 0.529038 | 1.905098   | 2.813623   | 0.155995   | 1.450412   |
| 0.60917   | 0.929806   | 1.148306   | 1           | 0.773073 | 0.799458   | 0.779032   | 0.040074   | 0.251319   |
| 3.088396  | 2.684712   | 0.50677    | 0.114207    | 0.331154 | 0.287506   | 0.905186   | 0.627949   | 0.172898   |
| 11.42562  | 9.535965   | 1.039304   | 0.664591    | 0.713538 | 0.728727   | 1.746353   | 13.00698   | 0.331001   |
| 29.32412  | 14.04696   | 0.82243    | 7.64091     | 0.444156 | 0.25983    | 3.163975   | 0.609976   | 0.508453   |
| 130.4162  | 81.70223   | 3.387168   | 31.65894    | 1.468842 | 2.953082   | 16.42203   | 9.235265   | 1.021094   |
| 5.138846  | 7.047562   | 0.612625   | 4.172845    | 0.398231 | 0.340432   | 2.360763   | 1.577563   | 0.202614   |
| 2.43977   | 4.961154   | 0.317325   | 0.338024    | 0.267198 | 0.257973   | 0.339792   | 5.582204   | 0.11108    |
| 14.24785  | 13.04434   | 0.567616   | 4.191207    | 0.834802 | 0.300024   | 2.612195   | 12.6759    | 0.291915   |
| 3.424878  | 2.346431   | 1.106153   | 1.186551    | 1.249781 | 1.177946   | 1.702467   | 12.70451   | 0.767181   |
| 1.665459  | 2.625035   | 0.952081   | 0.275595    | 2.236766 | 0.551439   | 0.794417   | 1.597244   | 0.287698   |
| 68.23002  | 52.82236   | 1.795477   | 25.23554    | 0.795557 | 2.058536   | 4.764712   | 12.19213   | 0.534184   |
| 7.958584  | 15.9924    | 1.199457   | 1.713216    | 0.553925 | 0.60654    | 1.927023   | 7.572845   | 1.213902   |
| 2.906263  | 12.18332   | 1.060653   | 0.216711    | 0.409842 | 0.580555   | 1.66998    | 9.714219   | 0.519601   |
| 1.641579  | 1.075493   | 0.870848   |             | 1.293539 | 1.250848   | 1.283644   | 24.9536    | 3.979008   |

| Liver_THB | Liver_PLAU | Liver_ET1 | Liver_PTGS | Liver_VWF | Liver_PRO | Liver_CD44 | Liver_TFPI | Liver_TFPIE |
|-----------|------------|-----------|------------|-----------|-----------|------------|------------|-------------|
| 0.91594   | 0.498558   | 1.077652  | 0.398927   | 2.675456  | 0.709068  | 0.134515   | 1.528053   | 1.687396    |
| 0.673938  | 4.197656   | 3.101252  | 2.152627   | 5.06389   | 1.279465  | 0.801129   | 2.376343   | 2.421789    |
| 1.637956  | 0.801111   | 2.151201  | 0.474178   | 2.096895  | 0.504966  | 0.191189   | 1.474949   | 2.069817    |
| 0.702612  | 0.404083   | 1.26357   | 2.875467   | 1.158356  | 3.184402  | 0.263164   | 5.369783   | 5.923039    |
| 2.533429  | 1.007535   | 1.818483  | 2.160673   | 3.11812   | 0.511627  | 0.222233   | 2.457945   | 1.909962    |
| 6.518742  | 13.38637   | 6.941512  | 11.94055   | 0.368442  | 9.034708  | 2.587993   | 0.995003   | 0.358223    |
| 1         | 1          | 1         | 1          | 1         | 1         | 1          | 1          | 1           |
| 0.790413  | 0.833485   | 3.057674  | 3.998631   | 2.260601  | 2.740757  | 0.864771   | 1.417158   | 2.992795    |
| 5.462676  | 5.056893   | 2.431732  | 8.440507   | 0.470084  | 10.81428  | 0.297707   | 1.771932   | 0.508305    |
| 2.341935  | 8.422994   | 5.643901  | 99.81758   | 0.639495  | 10.48134  | 1.550888   | 0.826679   | 0.119323    |
| 2.214912  | 2.198676   | 1.220913  | 3.21253    | 0.385477  | 14.0149   | 1.693028   | 1.896112   | 0.861148    |
| 0.883944  | 0.434953   | 2.441348  |            | 2.450752  | 0.645475  |            | 0.965439   | 1.161019    |
| 2.069921  | 1.092876   | 2.83087   |            | 1.586332  | 0.684763  |            | 1.105132   | 1.446664    |
| 4.71723   | 27.29118   | 9.797876  |            | 0.821745  | 0.949835  |            | 0.897891   | 0.229697    |
| 4.96451   | 4.703511   | 2.985725  |            | 0.80783   | 8.935224  |            | 0.981796   | 1.720718    |
| 3.202709  | 42.51704   | 54.50823  |            | 2.162025  | 18.31135  |            | 1.597521   | 0.365248    |
| 1.263887  | 0.286825   | 1.29472   |            | 0.633221  | 1.724806  |            | 0.699659   | 0.51536     |
| 2.348018  | 9.349541   | 3.982086  |            | 1.053009  | 28.26558  |            | 0.918109   | 0.402149    |
| 1.47363   | 0.905331   | 2.082595  |            | 2.284876  | 2.057175  |            | 3.260729   | 1.227013    |
| 2.755046  | 2.12943    | 0.841852  |            | 1.929536  | 3.083704  |            | 1.948871   | 1.549573    |
| 1         | 1          | 1         |            | 1         | 1         |            | 1          | 1           |
| 0.859045  | 0.332758   | 1.107138  |            | 1.225165  | 1.207906  |            | 1.03426    | 0.964626    |
| 3.428874  | 3.228117   | 1.349159  |            | 0.214107  | 4.74748   |            | 0.345583   | 0.116182    |
| 4.257217  | 1.26082    | 1.591372  | 1.414307   | 0.186358  | 10.4118   | 0.299273   | 0.943677   | 0.558202    |
| 2.667636  | 1.72247    | 0.697055  | 3.909721   | 0.183751  | 3.623909  |            | 0.671104   | 0.14201     |
| 1.377998  | 0.297956   | 0.508596  | 0.852038   | 1.149163  | 1.346823  |            | 0.473142   | 0.967389    |
| 1.563399  | 0.142205   | 0.813592  | 0.839041   | 0.927541  | 1.150729  | 1.068913   | 0.911      | 0.751614    |
| 1.864517  | 1.050101   | 1.716285  | 0.829853   | 0.13638   | 6.248615  | 0.094132   | 0.621855   | 0.350159    |
| 5.488353  | 2.665186   | 3.306327  | 4.56893    | 0.575964  | 18.47513  | 0.350679   | 1.000571   | 0.722872    |
| 4.680559  | 3.632397   | 4.926854  | 30.46722   | 0.306627  | 22.23633  | 0.745844   | 0.764431   | 0.119283    |
| 5.333459  | 28.03888   | 19.69874  | 204.0951   | 2.867034  | 13.77944  | 4.5699     | 0.914133   | 0.332269    |
| 1.728513  | 2.199472   | 1.42493   | 2.848877   | 0.18603   | 4.768814  | 0.347293   | 0.44766    | 0.120114    |
| 3.047318  | 0.581513   | 0.964318  | 0.431397   | 0.085803  | 3.740818  | 0.099008   | 0.734755   | 0.183977    |
| 2.517502  | 3.804381   | 3.395985  | 3.374686   | 0.721737  | 28.243    | 0.340264   | 0.766421   | 0.277824    |
| 2.740837  | 0.383163   | 0.785846  | 0.131636   | 1.341615  | 2.022788  | 0.690432   | 0.929963   | 1.465874    |
| 0.803624  | 0.261391   | 0.597014  | 1.89714    | 0.812951  | 0.993945  |            | 0.862864   | 1.623966    |
| 6.445394  | 4.96014    | 10.24857  | 51.78265   | 0.472911  | 21.65685  | 0.892924   | 1.274981   | 0.206312    |
| 2.982497  | 0.92216    | 1.775433  | 1.831403   | 0.590243  | 8.521184  | 0.057867   | 1.642687   | 0.779684    |
| 5.828317  | 1.24341    | 1.371887  | 1.197362   | 0.388576  | 6.696792  |            | 1.133162   | 0.728816    |
| 0.639632  | 0.3825     | 1.229117  | 1.191837   | 1.07812   | 0.869014  | 0.93553    | 1.097695   | 1.330471    |

| Liver_TFPI | Liver_SEL | Liver_C5AR | Liver_VEGF | Liver_SERP | Liver_STAT | Liver_OAS1 | Liver_OAS2 | Liver_OASL |
|------------|-----------|------------|------------|------------|------------|------------|------------|------------|
| 1.555231   | 1.938008  | 0.617183   | 1.649269   | 0.645737   | 5.551837   | 1.597215   | 1.200502   | 0.962322   |
| 1.631156   | 22.85341  | 4.501502   | 0.979981   | 1.453843   | 3.171436   | 3.876841   | 1.469433   | 2.087435   |
| 0.825859   | 4.704176  | 1.05264    | 1.519001   | 0.464396   | 5.866918   | 1.492726   | 1.325698   | 0.98182    |
| 4.248457   | 16.00637  | 0.586359   | 0.605423   | 1.209479   | 4.378081   | 0.621837   | 0.765335   | 0.542621   |
| 1.090506   | 11.89314  | 0.474452   | 0.966482   | 0.624028   | 2.375815   | 2.841962   | 1.377099   | 2.228597   |
| 1.508197   | 99.17513  | 0.881251   | 0.979425   | 377.6404   | 14.50943   | 1.822459   | 1.573647   | 1.158385   |
| 1          | 1         | 1          | 1          | 1          | 1          | 1          | 1          | 1          |
| 1.182993   | 3.87348   | 3.269021   | 0.562024   | 0.461688   | 1.96401    | 0.593275   | 0.468714   | 1.993316   |
| 1.460172   | 34.16972  | 5.05118    | 0.639681   | 34.45815   | 2.850029   | 0.984027   | 1.319246   | 0.97734    |
| 0.620811   | 45.56931  | 3.388258   | 1.077878   | 93.86038   | 1.464143   | 3.436203   | 0.625025   | 0.549396   |
| 1.792516   | 17.85286  | 1.744432   | 0.331883   | 144.1111   | 0.679388   | 0.56087    | 0.128636   | 1.022981   |
| 1.226786   | 10.3092   | 3.966114   | 1.803538   | 1.002717   | 1.855669   | 1.537423   | 1.304752   | 0.941613   |
| 1.346029   | 28.77923  | 3.534613   | 3.765496   | 1.268492   | 0.471211   | 0.54971    | 2.386456   | 1.386587   |
| 1.590291   | 194.5141  | 23.47912   | 3.123806   | 533.1372   | 5.51846    | 11.10099   | 6.42885    | 8.768302   |
| 2.620519   | 162.2713  | 17.13605   | 4.553354   | 13.1486    | 5.524636   | 2.76455    | 10.86455   | 7.901655   |
| 2.235011   | 559.9715  | 38.87409   | 5.364702   | 388.6463   | 0.815741   | 10.96954   | 15.05092   | 9.375671   |
| 0.89643    | 2.540469  | 1.513848   | 1.606465   | 0.283184   | 0.803781   | 0.710554   | 0.277187   | 0.328828   |
| 1.893149   | 24.37068  | 6.33605    | 7.698779   | 200.3893   | 3.793117   | 2.969533   | 3.094437   | 6.743315   |
| 1.874061   | 2.781973  | 2.526572   | 2.058432   | 1.313763   | 1.580291   | 2.269369   | 0.333619   | 2.712994   |
| 1.704538   | 105.2351  | 2.326801   | 6.973347   | 63.18141   | 2.625589   | 0.276736   | 2.262625   | 0.534429   |
| 1          | 1         | 1          | 1          | 1          | 1          | 1          | 1          | 1          |
| 0.787879   | 1.723566  | 2.415241   | 4.14207    | 0.751299   | 1.082554   | 1.66426    | 0.703597   | 0.775877   |
| 0.509602   | 93.75013  | 13.14171   | 1.682729   | 150.1046   | 1.472204   | 0.585358   | 0.459959   | 2.298276   |
| 1.302085   | 17.93907  | 6.689709   | 0.285867   | 36.83418   | 0.939387   | 0.711162   | 1.129693   | 2.625408   |
| 0.829696   | 40.40751  | 10.36071   | 0.874983   | 122.5121   | 0.740323   | 0.350577   | 0.636691   | 1.53814    |
| 0.819188   | 0.820835  | 1.049582   | 1.169284   | 0.917747   | 0.846797   | 1.469405   | 0.480727   | 0.85117    |
| 0.572689   | 0.318613  | 0.828918   | 0.649072   | 0.829537   | 0.995165   | 0.760937   | 0.912565   | 0.86682    |
| 0.92353    | 4.115759  | 2.673475   | 0.648592   | 81.68667   | 0.795716   | 0.564558   | 0.887421   | 1.973558   |
| 1.418748   | 8.727269  | 17.21849   | 0.509279   | 133.6908   | 0.83964    | 1.030505   | 1.799255   | 3.102224   |
| 0.889312   | 4.692083  | 34.0166    | 0.152629   | 358.9577   | 1.14269    | 3.116919   | 2.524733   | 5.419451   |
| 0.716072   | 129.6149  | 50.7674    | 7.824396   | 1196.502   | 0.944297   | 15.7397    | 2.78221    | 3.322245   |
| 0.409478   | 1.350203  | 6.47975    | 0.234475   | 101.4608   | 0.517784   | 0.384001   | 0.554499   | 1.192548   |
| 0.775825   | 8.377826  | 8.529237   | 0.45708    | 21.15947   | 0.693228   | 0.339275   | 0.453957   | 1.020698   |
| 0.942271   | 26.39099  | 29.27612   | 0.340622   | 156.9959   | 0.963446   | 1.663697   | 1.841661   | 3.668341   |
| 1.309607   | 1.413929  | 17.94353   | 0.479553   | 0.744056   | 1.034528   | 0.937547   | 1.735964   | 1.491095   |
| 1.177126   | 2.330566  | 5.33475    | 0.302772   | 0.950248   | 1.395033   | 0.888602   | 0.807236   | 1.374283   |
| 1.677435   | 31.32296  | 23.90722   | 2.029022   | 1436.009   | 1.072626   | 1.768799   | 2.107011   | 3.468586   |
| 1.340191   | 11.13712  | 3.567325   | 1.904544   | 81.58867   | 1.785418   | 1.172735   | 1.692384   | 3.404986   |
| 1.307286   | 42.55202  | 19.6298    | 1.213226   | 200.7347   | 1.252875   | 0.67247    | 1.08895    | 2.013432   |
| 1.746147   | 3.138601  | 1.206392   | 1.54066    | 1.205492   | 1.004858   | 1.314169   | 1.095812   | 1.153642   |

| Liver_OAS3 | Liver_FOS | Liver_MX1 | Liver_IL18 | Liver_IRF1 | Liver_IRF7 | Liver_IRF8 | Liver_CXCL | Liver_CXCL |
|------------|-----------|-----------|------------|------------|------------|------------|------------|------------|
| 4.561965   | 0.073312  | 0.76362   | 1.535785   | 1.346032   | 1.151529   | 1.062377   | 0.388727   | 1.941686   |
| 4.757501   | 0.228238  | 2.941793  | 1.018623   | 1.419049   | 1.356938   | 1.577505   | 1.029166   | 2.983807   |
| 1.910174   | 0.155917  | 1.275658  | 1.170777   | 1.150111   | 1.033764   | 1.426547   | 0.979183   | 1.588011   |
| 1.800803   | 0.106104  | 0.559134  | 1.088711   | 1.178477   | 1.113827   | 1.182652   | 0.686334   | 1.551298   |
| 6.103103   | 0.020547  | 1.253739  | 1.684811   | 0.928448   | 1.743231   | 2.001772   | 0.726405   | 2.73301    |
| 2.342576   | 0.007328  | 2.003785  | 0.203879   | 0.686115   | 1.644635   | 2.040646   | 13.348     | 133.9218   |
| 1          | 1         | 1         | 1          | 1          | 1          | 1          | 1          | 1          |
| 0.786727   | 0.02014   | 0.445992  | 1.123152   | 0.977514   | 0.854139   | 0.962288   | 1.321189   | 0.829501   |
| 3.3669     | 0.008115  | 0.954712  | 0.176804   | 0.384188   | 0.735083   | 0.976374   | 4.05931    | 22.59905   |
| 3.377123   | 0.00582   | 5.236301  | 0.175396   | 0.903353   | 1.365727   | 2.625131   | 17.05327   | 97.67908   |
| 7.038637   | 0.0022    | 1.262853  | 0.106113   | 0.385789   | 0.669852   | 0.626611   | 3.822233   | 61.55588   |
| 0.276456   | 3.768006  | 6.274638  | 2.30268    | 2.708647   | 3.236929   | 2.223397   |            | 0.416272   |
| 2.428359   | 13.07247  | 6.203561  | 2.936617   | 2.345142   | 2.431851   | 3.517584   | 8.935118   | 1.023729   |
| 3.064541   | 7.442003  | 73.33579  | 0.558008   | 6.04418    | 3.377623   | 13.90917   | 349.48     | 488.7991   |
| 5.216656   | 7.851577  | 8.2423    | 1.04211    | 2.785716   | 9.418532   | 1.393462   | 29.07643   | 96.34828   |
| 11.45391   | 17.84809  | 179.4998  | 0.978999   | 2.460322   | 7.777265   | 42.76096   | 2253.427   | 501.3947   |
| 0.469933   | 0.621298  | 3.047193  | 0.56195    | 0.909439   | 1.430031   | 5.503626   | 5.184725   | 0.562461   |
| 7.207356   | 5.195299  | 9.661462  | 0.263211   | 2.109616   | 2.598807   | 9.85449    | 249.8566   | 110.2935   |
| 0.995657   | 1.03986   | 2.367046  | 1.384093   | 1.02654    | 3.190989   | 4.102488   | 9.492562   | 53.4252    |
| 0.732954   | 33.18378  | 0.585405  | 0.460053   | 0.765752   | 0.313057   | 1.863817   | 9.062678   | 1.621585   |
| 1          | 1         | 1         | 1          | 1          | 1          | 1          | 1          | 1          |
| 0.394095   | 1.975534  | 3.187177  | 1.128561   | 1.392455   | 2.238107   | 2.20376    | 1.241897   | 0.595519   |
| 2.079832   | 2.047443  | 1.76302   | 0.171572   | 1.245725   | 1.499901   | 2.262523   | 82.29745   | 53.52184   |
| 5.151999   | 3.12437   | 1.172067  | 0.280131   | 0.546567   | 1.556349   | 1.279366   | 10.27426   | 130.5625   |
| 2.419586   | 1.326891  | 0.884113  | 0.088989   | 0.426205   | 1.206318   | 1.195426   | 12.13478   | 134.8918   |
| 0.706509   | 3.877772  | 1.313637  | 0.64341    | 0.459492   | 1.170617   | 0.978329   | 3.504211   | 0.664265   |
| 0.704556   | 0.691911  | 1.039492  | 0.843446   | 0.964534   | 0.914982   | 0.602342   | 1.132203   | 0.488681   |
| 2.612944   | 0.863247  | 1.064377  | 0.197746   | 0.352773   | 1.192724   | 1.00516    | 8.533117   | 40.44771   |
| 5.766941   | 2.867534  | 1.315059  | 0.377234   | 0.622693   | 1.488315   | 1.006486   | 18.58369   | 47.44248   |
| 12.04996   | 2.562396  | 9.68322   | 0.195292   | 0.913259   | 1.728805   | 2.662228   | 38.22076   | 101.201    |
| 8.294974   | 7.614987  | 72.22842  | 0.281314   | 1.693551   | 1.202158   | 5.01351    | 422.9397   | 534.5318   |
| 1.845524   | 0.797466  | 0.575037  | 0.155209   | 0.267307   | 0.607496   | 1.068801   | 12.33398   | 59.08374   |
| 1.160642   | 0.609042  | 0.774739  | 0.175314   | 0.33253    | 0.94805    | 0.622703   | 3.902234   | 50.51199   |
| 8.830395   | 2.086369  | 7.274775  | 0.290187   | 0.877628   | 2.000699   | 3.629742   | 27.74491   | 62.52677   |
| 3.081147   | 2.084965  | 1.44488   | 1.583965   | 1.320494   | 1.895607   | 2.277818   | 2.335797   | 2.241601   |
| 0.56448    | 0.948179  | 1.521603  | 1.008914   | 1.279083   | 1.357602   | 0.815914   | 2.64243    | 1.120156   |
| 6.241457   | 6.622789  | 5.18682   | 0.303705   | 1.169275   | 1.743082   | 5.331964   | 128.062    | 151.6876   |
| 5.60154    | 1.53839   | 2.414828  | 0.299664   | 0.994354   | 2.33828    | 1.989575   | 19.92399   | 87.12362   |
| 3.704668   | 1.240149  | 1.55157   | 0.249145   | 0.654257   | 1.549381   | 1.02442    | 13.65099   | 74.43902   |
| 1.419334   | 1.445272  | 0.962008  | 1.185613   | 1.03677    | 1.092917   | 1.660185   | 0.883234   | 2.046325   |



| Liver_IFIH1 | Liver_DDX5 | Liver_KLF2 | Liver_HNF1 |
|-------------|------------|------------|------------|
| 1.407919    | 1.238724   | 0.909539   | 1.05739    |
| 1.447384    | 1.404987   | 0.880276   | 1.259822   |
| 1.35081     | 1.870749   | 3.427519   | 1.288668   |
| 1.216836    | 1.072773   | 0.737294   | 0.787958   |
| 1.82272     | 2.006452   | 2.176902   | 1.507968   |
| 0.533641    | 0.542672   | 1.831985   | 0.91133    |
| 1           | 1          | 1          | 1          |
| 0.922347    | 1.135824   | 0.971922   | 0.849919   |
| 0.293966    | 0.381305   | 0.748178   | 0.621281   |
| 0.542544    | 0.391232   | 10.23667   | 0.63476    |
| 0.302831    | 0.337728   | 2.977163   | 0.353006   |
| 0.966616    | 0.859037   | 3.273839   | 2.562631   |
| 0.998053    | 1.285024   | 2.880546   | 1.663199   |
| 1.428671    | 1.140455   | 4.050856   | 1.831064   |
| 0.762935    | 1.467435   | 2.39222    | 2.105832   |
| 1.62555     | 0.909296   | 9.502708   | 2.168841   |
| 0.862711    | 0.617206   | 0.321588   | 0.619223   |
| 0.547277    | 0.610517   | 3.512133   | 1.742708   |
| 1.165027    | 1.316728   | 1.363529   | 1.266497   |
| 0.426058    | 0.620286   | 1.577947   | 1.192167   |
| 1           | 1          | 1          | 1          |
| 1.020528    | 1.071316   | 0.994239   | 2.099874   |
| 0.246212    | 0.247538   | 1.048564   | 1.360049   |
| 0.593841    | 0.888622   | 0.997219   | 0.653571   |
| 0.336015    | 0.609406   | 1.026397   | 0.766231   |
| 0.826929    | 1.64158    | 1.175846   | 1.292318   |
| 0.938891    | 0.58242    | 0.439121   | 0.629095   |
| 0.437439    | 0.383464   | 1.62814    | 0.273309   |
| 0.501329    | 0.673539   | 1.734863   | 0.714958   |
| 0.936579    | 0.527358   | 2.301555   | 0.422349   |
| 1.573088    | 2.328082   | 8.036089   | 0.224717   |
| 0.318589    | 0.342923   | 1.18745    | 0.569503   |
| 0.523348    | 0.395953   | 0.791079   | 0.379035   |
| 0.614405    | 0.594651   | 1.74727    | 0.665762   |
| 1.275806    | 1.744142   | 1.149437   | 1.290505   |
| 1.362586    | 0.716858   | 0.341969   | 0.851684   |
| 0.839301    | 0.783682   | 3.463626   | 1.538454   |
| 0.901741    | 1.531206   | 0.978531   | 0.977878   |
| 0.588796    | 0.780075   | 1.045923   | 1.02817    |
| 1.065086    | 1.716974   | 2.277278   | 1.589584   |

**Supplemental Table 7**

| Mouse ID | Gender | Genotype | Tx     | Group        | KIDNEY-ICA | Kidney_SEL | Kidney_IL6 | Kidney_SOI |
|----------|--------|----------|--------|--------------|------------|------------|------------|------------|
| 5129     | F      | fl/+     | Saline | Saline_fl/+  | -0.03765   | 1.512478   | -1.21941   | -0.1245    |
| 5130     | F      | fl/fl    | Saline | Saline_fl/fl | 0.273184   | 3.278635   | -0.04319   | 0.648275   |
| 5132     | M      | fl/fl    | Saline | Saline_fl/fl | -0.36346   | 1.22282    | 0.001518   | 0.584846   |
| 5133     | F      | fl/fl    | Saline | Saline_fl/fl | 0.477024   | 3.616386   | 0.273273   | 1.123116   |
| 5135     | M      | fl/fl    | Saline | Saline_fl/fl | 0.586155   | 1.983688   | 0.840523   | 1.257746   |
| 5137     | M      | fl/fl    | LPS    | LPS_fl/fl    | 2.199444   | 5.886215   | 7.37064    | 5.386599   |
| 5139     | M      | +/+      | Saline | Saline_+/+   | 0          | 0          | 0          | 0          |
| 5140     | F      | +/+      | LPS    | LPS_+/+      | 3.119209   | 5.318974   | 5.511379   | 4.755705   |
| 5142     | F      | fl/+     | Saline | Saline_fl/+  | 0.032154   | 0.986221   | 0.17482    | 0.820221   |
| 5143     | F      | fl/+     | LPS    | LPS_fl/+     | 3.409996   | 5.939266   | 7.925144   | 6.260839   |
| 5144     | M      | fl/+     | LPS    | LPS_fl/+     | 3.053694   | 5.15844    | 5.185793   | 4.307207   |
| 5150     | M      | fl/fl    | Saline | Saline_fl/fl | 0.503309   | -0.16714   | 0.190874   | 0.247366   |
| 5151     | F      | fl/fl    | Saline | Saline_fl/fl | 0.435799   | 2.399986   | -2.34808   | 0.862123   |
| 5155     | F      | fl/fl    | LPS    | LPS_fl/fl    | 5.542513   | 3.656151   | 10.30392   | 5.951374   |
| 5156     | F      | fl/fl    | LPS    | LPS_fl/fl    | 1.185415   | 1.325159   | 6.136724   | 0.085371   |
| 5178     | M      | fl/fl    | LPS    | LPS_fl/fl    | 3.70586    | -1.91824   | -4.45667   | 3.646122   |
| 5179     | M      | fl/fl    | Saline | Saline_fl/fl | 0.237814   | -0.8165    | -0.50199   | -0.65733   |
| 5180     | F      | +/+      | LPS    | LPS_+/+      | 4.106718   | 2.47019    | 8.263233   | 5.526072   |
| 5181     | M      | fl/+     | LPS    | LPS_fl/+     | 0.727171   | -1.64733   | 0.483423   | -1.00379   |
| 5182     | F      | fl/fl    | Saline | Saline_fl/fl | 1.645779   | 1.877659   | 5.350048   | 2.339405   |
| 5183     | F      | +/+      | Saline | Saline_+/+   | 0          | 0          | 0          | 0          |
| 5184     | M      | fl/+     | Saline | Saline_fl/+  | -0.24056   | -1.32079   | 0.618589   | -0.60459   |
| 5185     | M      | fl/+     | LPS    | LPS_fl/+     | 3.655201   | 2.007597   | 6.807116   | 4.199827   |
| 5219     | M      | +/+      | LPS    | LPS_+/+      | 1.987885   | 0.421926   | 6.160135   | 2.30143    |
| 5220     | M      | fl/+     | LPS    | LPS_fl/+     | 2.92169    | -1.1942    | 4.289671   | 3.666336   |
| 5221     | M      | fl/+     | saline | Saline_fl/+  | -0.71905   | -0.64039   | -1.99018   | -1.7966    |
| 5226     | M      | +/+      | saline | Saline_+/+   | 0.171061   | 1.216911   | 1.175728   | -1.16616   |
| 5228     | M      | fl/+     | LPS    | LPS_fl/+     | 2.416086   | 0.179337   | 3.940735   | 1.329351   |
| 5230     | F      | +/+      | LPS    | LPS_+/+      | 3.009216   | 2.600588   | 7.751316   | 3.381695   |
| 5231     | F      | fl/+     | LPS    | LPS_fl/+     | 3.612831   | 1.844479   | 7.94656    | 5.573807   |
| 5232     | F      | fl/fl    | LPS    | LPS_fl/fl    | 4.731182   | 0.936483   | 11.13372   | 5.020716   |
| 5233     | M      | fl/+     | LPS    | LPS_fl/+     | 1.782167   | 3.476553   | 7.854252   | 6.546446   |
| 5234     | M      | +/+      | LPS    | LPS_+/+      | 2.178543   | -1.3736    | 3.85087    | 4.258171   |
| 5239     | F      | fl/+     | LPS    | LPS_fl/+     | 2.924772   | 1.599678   | 7.444796   | 3.845966   |
| 5240     | F      | fl/+     | saline | Saline_fl/+  | -0.90178   | 0.090801   | -1.20319   | 0.654224   |
| 5241     | M      | fl/+     | saline | Saline_fl/+  | -1.45335   | -1.13292   | -0.24692   | -0.73625   |
| 5242     | M      | fl/fl    | LPS    | LPS_fl/fl    | 3.171242   | 3.849104   | 9.063236   | 7.326674   |
| 5243     | M      | +/+      | LPS    | LPS_+/+      | 1.847694   | 0.522917   | 4.659294   | 1.41781    |
| 5244     | M      | +/+      | LPS    | LPS_+/+      | 3.395941   | 0.42944    | 4.004831   | 4.305792   |
| 5245     | F      | +/+      | saline | Saline_+/+   | -0.17106   | -1.21691   | -1.17573   | 1.166161   |

| Kidney_ST# | Kidney_CEI | Kidney_F3 | Kidney_RH | Kidney_TSF | Kidney_PL# | Kidney_PL# | Kidney_THI | Kidney_PL# |
|------------|------------|-----------|-----------|------------|------------|------------|------------|------------|
| 0.413256   | 2.021477   | 0.080416  | 0.331924  | 0.284239   | 1.497627   | -0.62242   | 0.356752   | 0.265501   |
| 0.527964   | 1.92557    | 0.188105  | 0.024296  | -0.586     | 0.88802    | -0.10782   | 0.151585   | 0.230469   |
| 0.437485   | 1.753754   | 1.236629  | 0.441154  | 0.911757   | 0.681757   | -0.15478   | 0.302197   | 1.047491   |
| 0.607613   | 1.96587    | 0.121166  | 0.298685  | 0.514341   | 1.191359   | 0.311417   | 0.651281   | 0.943636   |
| 0.595253   | 1.341629   | 0.951141  | 0.908234  | 0.84901    | 0.949162   | -0.06425   | 0.456375   | 1.478249   |
| 2.44733    | 2.796463   | 0.692451  | 1.634478  | -1.34747   | 0.760042   | -1.52591   | 0.239466   | 3.820204   |
| 0          | 0          | 0         | 0         | 0          | 0          | 0          | 0          | 0          |
| 1.844664   | 3.285748   | -1.31165  | 1.466314  | -1.00763   | 1.530502   | -3.13278   | -0.60684   | 2.937141   |
| 0.636744   | 1.99366    | -0.65008  | 0.675442  | 0.320576   | 0.764032   | 0.116135   | 0.004852   | 0.527769   |
| 2.788998   | 3.863279   | 0.218891  | 2.568338  | -1.00061   | 1.499716   | -3.35971   | 0.354807   | 4.037895   |
| 1.71509    | 2.276833   | -0.27192  | 0.974154  | -1.10272   | 0.736139   | -2.21375   | -0.28644   | 2.055252   |
| -0.59893   | -1.90018   | 0.776716  | -1.18264  | -0.62959   | -1.27056   | -0.78229   | -0.6775    | -0.02508   |
| -8.0304    | -5.73028   | -3.68177  | -4.99992  | -3.34303   | -0.0589    | -0.82259   | 0.54055    | 1.302235   |
| 2.536985   | 1.104475   | 3.615705  | 1.847544  | -0.6757    | 0.597799   | -2.87723   | -0.05663   | 3.705435   |
| -1.20977   | -2.57913   | 0.759039  | -1.99416  | -2.72882   | -1.76833   | -7.81576   | -2.49621   | 0.206043   |
| -14.5811   |            | 4.794668  |           | -0.99694   | -0.53681   | -2.33842   | -0.111     | 4.170544   |
| -1.13468   | -1.35509   | 0.559435  | -1.48657  | -0.38909   | -0.60408   | -0.28019   | -0.09      | -0.02791   |
| 1.664862   | 1.434519   | -0.42929  | 1.401596  | -0.75887   | 0.342737   | -2.25386   | 0.613098   | 3.603765   |
| -0.77059   | -1.28374   | 1.015738  | -1.53384  | -0.50947   | -0.51683   | -0.24107   | 0.008781   | -0.29678   |
| 0.837128   | 3.497843   | 0.999531  | 0.526325  | 0.789858   | -0.49237   | -1.2045    | 0.645342   | 1.369164   |
| 0          | 0          | 0         | 0         | 0          | 0          | 0          | 0          | 0          |
| -1.27629   | -1.54936   | -0.42738  | -1.86932  | -0.77297   | -1.30205   | -1.83539   | -0.93914   | 0.438658   |
| 1.018963   | -0.02004   | -0.05059  | 0.504993  | -1.44002   | -0.08323   | -2.91546   | -0.12329   | 2.360746   |
| 1.645535   | 0.522837   | 1.875378  | 0.699249  | 0.022906   | -0.64488   | -0.57201   | -0.72055   | 0.095876   |
| 0.999838   | -0.49216   | 0.457924  | 0.310009  | -1.4505    | -1.12085   | -3.79955   | -0.45385   | 0.327506   |
| 0.622553   | -3.11135   | 0.532564  | 0.492699  | 0.89891    | -1.81646   | -0.93979   | 0.108649   | -0.41733   |
| -0.54798   | -0.63544   | 0.029171  | -0.44987  | -0.42888   | -0.2757    | 0.646337   | -0.45188   | -0.28478   |
| 3.289932   | 0.769547   | 0.579939  | 0.622349  | -0.78512   | 0.295347   | -1.82964   | -0.79089   | -0.82514   |
| 1.67395    | 3.62833    | 0.415586  | 1.481956  | -0.33812   | 0.579952   | -2.20989   | -0.28205   | 2.091361   |
| 3.01446    | 0.871822   | 0.033798  | 2.376608  | 0.067426   | -0.63482   | -3.90252   | 1.295205   | 3.686418   |
| 2.635809   | 0.932882   | 4.188005  | 2.649986  | 0.397351   | -0.14665   | -2.5264    | 0.510968   | 3.045106   |
| 1.580881   | 1.130157   | 1.096926  | 2.170589  | 0.389531   | 1.486853   | -3.4366    | 0.56845    | 3.567956   |
| 2.96698    | -0.57614   | 0.887262  | 0.952404  | -0.58189   | 0.511724   | -1.65419   | 0.324347   | 1.871715   |
| 2.153429   | 2.987381   | -0.66494  | 1.85956   | -1.06843   | 0.860699   | -3.36784   | -0.20248   | 4.049333   |
| -0.02145   | 1.948441   | -0.15493  | -0.92043  | 0.605399   | 0.784803   | 0.575549   | 0.252595   | 0.250375   |
| -0.6033    | -1.80206   | -0.05322  | -1.78205  | -0.67939   | -1.18503   | -1.78073   | -1.74419   | -1.63385   |
| 2.580528   | 1.213202   | 3.434364  | 2.800911  | 1.022819   | 0.897509   | -1.36253   | 1.135121   | 5.476956   |
| 1.773245   | -1.05686   | 2.009432  | 0.25028   | 0.263457   | 0.213734   | -2.97743   | -0.93685   | -0.14021   |
| 1.57234    | 0.857788   | 2.060564  | 1.976007  | 0.854777   | 1.203686   | -2.72952   | 0.158259   | 0.471681   |
| 0.547979   | 0.635445   | -0.02917  | 0.449869  | 0.428876   | 0.275696   | -0.64634   | 0.451882   | 0.284781   |

| Kidney_SYI | Kidney_ET1 | Kidney_PT1 | Kidney_VM | Kidney_PR1 | Kidney_CD | Kidney_TFF | Kidney_TFF | Kidney_TFF |
|------------|------------|------------|-----------|------------|-----------|------------|------------|------------|
| -0.11799   | 1.098648   | 0.694284   | 1.839319  | -0.12833   | 2.508963  | 3.458002   | 3.195765   | 1.955925   |
| 1.959433   | -8.17899   | -0.53581   | 1.600193  | 0.03553    | 1.296522  | 2.543619   | 2.226002   | 1.719997   |
| 0.121876   | 0.686039   | 4.333078   | 3.686476  | 4.209932   | 5.971403  | 3.774944   | 4.065235   | 2.922657   |
| 1.082973   | 0.858147   | 0.950735   | 1.889278  | -0.18727   | 2.953714  | 2.787489   | 3.277943   | 1.456287   |
| 0.341206   | 0.305475   | 1.966753   | 2.189976  | 1.118441   | 3.441496  | 1.428135   | 1.67737    | 1.546968   |
| -0.89701   | 2.349737   | 4.079424   | 0.609631  | 6.458187   | 0.910482  | 3.702003   | 2.87142    | 2.429276   |
| 0          | 0          | 0          | 0         | 0          | 0         | 0          | 0          | 0          |
| -0.73948   | 2.298441   | 0.425575   | -1.97705  | -0.00015   | -0.04161  | -0.13684   | -2.58393   | -1.93966   |
| 0.628269   | 0.359652   | 0.200546   | 1.679304  | 0.970884   | 1.59737   | 2.513094   | 4.251692   | 2.255867   |
| -1.46037   | 3.317717   | 6.122181   | 1.4723    | 5.614824   | 4.442482  | 2.906609   | 0.04731    | 3.22703    |
| -0.74642   | 1.584549   |            |           |            |           |            |            |            |
| -1.22812   | -0.25894   | -0.16411   | 0.204453  | -1.26776   | -0.38275  | -0.88262   | -0.64078   | -0.80944   |
| 0.527252   | 2.45459    | 1.138378   | 1.516037  | 0.329704   | 1.204403  | 0.497995   | -0.34127   | 0.016096   |
| -2.25225   | 3.190521   | 3.90173    | -0.86506  | 1.247932   | 0.766722  | -1.58732   | -3.83748   | -1.17157   |
| -5.69592   | 1.32585    | -1.71306   | -4.09555  | -0.35825   | 0.434275  | -1.30366   |            |            |
| -4.4718    | 2.617243   | 3.280508   | -2.55021  | 0.774609   | -2.31766  | -2.57133   | -5.99958   | -2.08574   |
| -1.04916   | 0.141844   | -0.63155   | -0.04057  | -0.42078   | -2.5321   | -0.9081    | -0.77295   | -0.99463   |
| -1.4415    | 3.56064    | 3.751837   | -1.46452  | -0.08399   | 1.264677  | -0.53786   | -3.10418   | -0.29178   |
| -1.07881   | -0.28477   | -0.8834    | -0.88159  | -0.61687   | -2.19066  | -0.67979   | -1.58451   | -1.19213   |
| 0.41547    | 1.470829   | 1.369678   | 1.801212  | 2.164997   | 2.024204  | 0.118845   | -0.81634   | -0.20222   |
| 0          | 0          | 0          | 0         | 0          | 0         | 0          | 0          | 0          |
| -0.33842   | -0.43918   | -0.04021   | -0.357    | -0.52871   | -0.82948  | -0.60813   | -1.43171   | -0.93785   |
| -1.10625   | 2.55423    | 2.079422   | -1.65622  | 0.354496   | 1.706991  | -2.07234   | -3.05839   | -1.22067   |
| -0.47919   | 1.183988   | -2.6475    | 1.687104  | -5.35966   | -0.24573  | -2.14947   | -2.71482   | -0.15692   |
| -0.88756   | 1.49433    | 1.865753   | 0.627851  | -3.59762   | -2.48517  | -1.8139    | -4.02765   | -0.09044   |
| -0.35119   | -1.02923   | -0.74141   | 2.674844  | -3.14289   | -1.7619   | -0.70552   | 0.655685   | 1.718821   |
| -0.03837   | 0.530597   | -0.19765   | 2.395616  | -1.86458   | 2.224889  | -0.83076   | 0          | -2.4355    |
| -0.84658   | 2.091851   | -0.66543   | 0.002284  | -4.8321    | -1.82591  | -0.48198   | -1.73387   | 1.337299   |
| 0.041113   | 2.112412   | 2.527403   | 1.921807  | -2.37757   | 0.326459  | 0.323912   | -0.48576   | 1.277599   |
| -0.69781   | 2.366939   | 3.83499    | 1.339618  | -3.65731   | -1.54928  | -0.11467   | -4.15382   | 1.06715    |
| -2.51882   | 1.801953   | 5.491459   | 1.915185  | -1.48845   | 2.793565  | 0.451406   | -1.38487   | 0.937572   |
| -0.87391   | 1.074521   | 1.943472   | -0.03186  | -2.58696   | 1.238059  | -0.3305    | -3.24963   | -1.06957   |
| -0.22886   | 1.704713   | 0.533918   | 1.328115  | -2.39606   | -0.37577  | -2.08475   | -1.78691   | 1.101501   |
| -0.97206   | 1.985732   | -0.06033   | 1.592652  | -2.84822   | -0.10481  | -2.57612   | -4.26134   | 0.043417   |
| 0.700676   | -0.58297   | -0.92126   | 3.781127  | -3.35996   | -0.19146  | 0.832487   | -0.97866   | 0.974722   |
| -0.4769    | -1.04158   | -0.83823   | 2.225814  | -4.84028   | -3.57465  | -0.07711   | -1.67291   | 0.172991   |
| -1.22367   | 2.426576   | 5.174128   | 1.200456  | 0.583572   | 2.201949  | -1.41494   | -3.30374   | 1.462576   |
| -1.80513   | 1.116328   | -0.3921    | 2.10971   | -3.01001   | -2.8553   | -0.71996   | -2.43234   | -0.04452   |
| 0.310436   | 2.666726   | 1.578192   | 0.854098  | -2.15079   | -1.45026  | -0.03341   | -1.07795   | 0.282244   |
| 0.038368   | -0.5306    | 0.197651   | -2.39562  | -4.04878   | -2.22489  | 0.830765   |            | 2.435503   |

| Kidney_SEL | Kidney_C5 | Kidney_VE | Kidney_SEF | Kidney_ST | Kidney_OA | Kidney_OA | Kidney_OA | Kidney_OA |
|------------|-----------|-----------|------------|-----------|-----------|-----------|-----------|-----------|
| 1.269251   | 2.162123  | 2.916624  | -0.3482    | -0.04277  | 0.438843  | 0.728905  | 0.175632  | 1.938715  |
| 2.356091   | 2.26005   | 2.520353  | -0.42876   | 0.495373  | 0.359022  | 1.297119  | 0.542112  | 1.274065  |
| 4.638296   | 4.849234  | 6.824125  | 3.507164   | 3.227791  | 1.718117  | 4.367758  | 3.350674  | 2.920351  |
| 2.292814   | 3.317087  | 2.906809  | 0.635353   | 0.742064  | 1.576694  | 2.022707  | 1.173035  | 3.626066  |
| 1.92415    | 4.883738  | 3.831381  | 2.523823   | 1.112734  | 1.614653  | 2.53714   | 2.132542  | 5.670525  |
| 6.434731   | 5.538319  | 4.228794  | 5.937637   | 4.487949  | 2.609201  | 4.628534  | 4.967222  | 6.022429  |
| 0          | 0         | 0         | 0          | 0         | 0         | 0         | 0         | 0         |
| 3.86376    | 1.861258  | 0.940973  | 2.010941   | 1.075802  | 1.576622  | 1.434242  | 2.525763  | 4.005497  |
| 0.553436   | 3.104691  | 4.352018  | 0.259508   | 1.962849  | 0.59874   | 1.259262  | 1.04278   | 0.943504  |
| 8.214859   | 3.953663  | 1.94389   | 6.187994   | 5.557039  | 6.383612  | 4.791891  | 4.371147  | 6.390137  |
| 1.196426   | 0.423565  | 0.796825  | -0.2116    | -6.09826  | 0.154839  | -1.20528  | -0.54749  | -1.73708  |
| 1.916176   | 0.739208  | 1.395432  | -0.33458   | 0.500317  | 0.705044  | -0.6075   | 1.807709  | -0.24557  |
| 7.709177   | 1.608521  | -0.60858  | 3.019424   | 2.165882  | 5.735958  | 1.629871  | 3.107082  | 2.212635  |
| 7.049353   | 1.23769   | 0.182196  | -3.39279   | 1.609356  | 1.747765  | 1.36553   | 1.826096  | 1.947975  |
| 7.669436   | 1.219425  | -1.86286  | 4.180803   | 2.304087  | 5.505375  | -0.61533  | 2.6075    | 3.320885  |
| 1.267834   | 2.323545  | 0.85461   | -0.38218   | -0.18592  | 1.742373  | -0.44146  | -1.0801   | 0.231892  |
| 6.260258   | 1.123894  | -0.78649  | 4.047905   | 3.225163  | 5.492216  | 0.475216  | 1.950716  | 2.133354  |
| -0.01217   | 0.655165  | 0.154879  | -1.27036   | 0.022087  | 3.634647  | 1.562593  | 0.237196  | 2.116287  |
| 5.970818   | 1.845266  | 0.377245  | 2.195366   | -0.25444  | 0.711288  | -0.44759  | -0.34711  | -0.30494  |
| 0          | 0         | 0         | 0          | 0         | 0         | 0         | 0         | 0         |
| 0.915207   | 2.144444  | 0.605507  | 0.136076   | -1.49093  | 0.431236  | -0.90766  | -0.03354  | 1.499664  |
| 5.632404   | 1.11552   | -1.06618  | 5.085316   | 0.924652  | 3.139143  | 2.028492  | 3.002596  | 1.392542  |
| 2.587812   | -0.03721  | -2.16401  | -1.16507   | 1.469695  | 2.440596  | 1.884672  | 2.431425  | 2.551105  |
| 1.343655   | -2.73201  | -2.69841  | -0.26397   | 1.094466  | 2.602821  | 1.12351   | 2.064598  | 1.706432  |
| -0.84256   | -2.27068  | -1.46252  | -3.40099   | -0.80486  | -0.56341  | -0.37547  | -0.49549  | -0.21651  |
| 0.171539   | 0.615724  | -1.04755  | -0.04829   | -0.2712   | 0.144461  | -0.05309  | -0.07633  | 0.049429  |
| 1.307526   | 0.410295  | -0.87065  | 0.052138   | 1.142447  | 2.72049   | 1.513788  | 1.701529  | 1.842653  |
| 4.461082   | 1.181312  | -0.35057  | -0.30071   | 0.887322  | 2.322741  | 1.761278  | 2.062458  | 2.148258  |
| 1.58992    | -0.78314  | -0.56509  | 1.091979   | 2.889592  | 5.795471  | 2.548849  | 3.72097   | 3.372805  |
| 3.678185   | -0.20071  | -1.21354  | 1.24611    | 2.784446  | 7.461332  | 1.787138  | 1.969181  | 2.891258  |
| 2.810345   | -0.71795  | -1.2754   | 1.226413   | 0.980828  | 3.429274  | 1.595837  |           | 1.764128  |
| 0.860819   | 0.227773  | -1.69134  | 1.240932   | 1.250468  | 2.148212  | 1.247355  | 1.838499  | 2.111542  |
| 3.101774   | -1.9875   | -1.86495  | 2.718581   | 0.92615   | 2.881189  | 1.028048  | 1.877747  | 0.75038   |
| -0.76259   | -1.4467   | -0.65012  | -0.76153   | 0.389722  | 0.247622  | 0.554354  | -0.15893  | -0.08505  |
| -1.14612   | -0.38131  | -0.20967  | -2.96068   | -1.21771  | -1.32011  | -1.11728  | -1.36878  | -1.39089  |
| 6.09882    | -1.14652  | -1.44523  | 1.499356   | 1.944638  | 4.077269  | 2.20126   | 2.701912  | 3.396797  |
| 3.880249   | 1.361508  | -2.19552  | 1.785201   | 1.571364  | 3.06757   | 2.263132  | 2.075977  | 1.721107  |
| 3.445757   | -0.09212  | -0.28525  | 0.970349   | 1.315553  | 2.821898  | 1.927843  | 1.788464  | 2.3617    |
| -0.17154   | -0.61572  | 1.047545  | 0.048293   | 0.271195  | -0.14446  | 0.053089  | 0.076332  | -0.04943  |

| Kidney_FO | Kidney_M | Kidney_IL1 | Kidney_IRF | Kidney_IRF | Kidney_IRF | Kidney_CX | Kidney_CX | Kidney_IFI |
|-----------|----------|------------|------------|------------|------------|-----------|-----------|------------|
| 0.298452  | 2.570082 | 0.182848   | 1.848822   | 0.717697   | 1.094612   | 0.873583  | 2.171083  | 1.717949   |
| -0.26877  | 2.359655 | -1.19579   | 0.754061   | 0.791164   | 0.293289   | 0.336073  | 0.075163  | 0.396484   |
| 3.638697  | 4.797007 | 2.014683   | 3.275902   | 3.004833   | 3.496931   | 3.818644  | 2.415205  | 3.360935   |
| 1.394842  | 3.061047 | -0.71922   | 2.217489   | 1.976543   | 0.476328   | 3.257114  | 1.386934  | 2.146269   |
| 0.787605  | 3.910963 | 0.099592   | 0.536741   | 1.632708   | 0.59618    | 3.017843  | 3.039793  | 0.648031   |
| 1.183563  | 8.559776 | 2.464842   | 3.948492   | 7.014448   | 4.512053   | 8.357834  | 9.506042  | 3.824659   |
| 0         | 0        | 0          | 0          | 0          | 0          | 0         | 0         | 0          |
| -2.47495  | 3.735092 | -1.47817   | 0.9182     | 2.643463   | -0.00492   | 3.696739  | 6.470341  | 0.417627   |
| -0.64635  | 3.294722 | 0.534691   | 1.770451   | 1.444733   | 1.206518   | 1.67329   | 1.97229   | 1.157633   |
| 2.32346   | 9.263176 | 1.494062   | 5.206284   | 6.094528   | 4.644545   | 8.072556  | 10.26512  | 4.492039   |
| 3.735765  | 0.153839 | 0.812017   | 0.12063    | -0.90881   | -1.10371   | 3.408899  | 1.55999   | 0.275879   |
| 4.177067  | 0.631598 | 1.495907   | 0.446802   | 0.479361   | -0.20021   | 1.144695  | 1.41713   | 1.789824   |
| 7.98543   | 8.994232 | 1.105158   | 2.099625   | 3.183851   | 2.381397   | 7.032499  | 9.987009  | 3.737276   |
| 3.070585  | 2.756538 | 0.649282   | 0.531588   | 4.016499   | -1.63957   | 2.743534  | 7.156952  | 2.68771    |
| 5.682774  | 5.84186  | 2.092665   | 2.599316   | 4.008234   | 4.788557   | 10.50824  | 8.014919  | 3.243635   |
| 4.288481  | 1.537804 | 0.499994   | -1.2073    | -1.03751   | 0.57888    | 0.492765  | 0.509018  | 1.821304   |
| 4.78582   | 4.371946 | 2.326273   | 1.956059   | 4.826448   | 0.465773   | 5.129948  | 8.037325  | 4.469013   |
| 3.227028  | 1.508022 | 2.303328   | -0.92619   | 4.620094   | -0.83641   | 0.373892  | 5.700432  | 2.049212   |
| 5.460192  | -0.11485 | 1.222652   | 0.161264   | -0.31966   | -0.28451   | 1.997168  | 1.938848  | 1.04418    |
| 0         | 0        | 0          | 0          | 0          | 0          | 0         | 0         | 0          |
| 4.681795  | -0.82122 | 1.327883   | -0.53462   | 0.619228   | -0.07347   | -0.90089  | -0.35289  | 2.574493   |
| 3.60442   | 4.424936 | -0.04522   | 1.147696   | 3.008404   | 1.339462   | 6.524305  | 5.750174  | 3.148706   |
| 2.07525   | 2.336477 | -0.42202   | 0.516919   | 3.501933   | -0.5087    | 1.608172  | 4.923328  | -0.42685   |
| 1.198663  | 3.003244 | -0.84838   | 0.836532   | 4.036094   | 0.869154   | 2.664727  | 3.648567  | 0.460917   |
| 1.432927  | -0.18129 | -0.45327   | 0.467515   | -0.39287   | 0.244425   | -2.8757   | -0.26134  | -1.24807   |
| -0.66936  | -0.64479 | -0.92698   | 0.33814    | 0.620673   | -0.69125   | 0.574126  | 0.205803  | -1.31493   |
| -0.30717  | 1.886244 | -0.41181   | 0.574832   | 4.577336   | 0.726807   | 0.230178  | 3.636652  | 0.276027   |
| 1.411847  | 1.972559 | -0.88571   | 0.717629   | 3.441855   | -0.60582   | 2.924882  | 5.427254  | -0.81272   |
| 2.214725  | 5.972178 | -0.41761   | 2.031661   | 3.365907   | 0.772184   | 5.813878  | 8.329351  | 1.397849   |
| 5.031491  | 7.573597 | -0.88304   | 3.416818   | 2.340907   | 2.787169   | 5.520492  | 7.383717  | 2.325225   |
| 1.371409  | 3.128849 | -0.45276   | -0.25393   | 2.171704   | 1.220955   | 3.524102  | 5.671089  | 0.576745   |
| 0.224675  | 1.799675 | -0.48046   | 0.342147   | 3.214063   | 0.299639   | 1.966641  | 5.334438  | -0.42993   |
| 1.723029  | 5.097507 | -0.4262    | 2.197806   | 3.795993   | 1.014641   | 2.936933  | 6.163729  | 0.746707   |
| -0.12767  | 0.920774 | 0.298008   | 1.741147   | 0.841353   | 1.189089   | -1.91039  | -0.07308  | 0.714053   |
| -1.23394  | -0.08789 | 0.315165   | 0.819898   | 0.058343   | 0.212763   | -2.59248  | 1.636885  | 0.076398   |
| 3.311284  | 5.439823 | 0.925106   | 2.303782   | 2.931239   | 2.740929   | 6.545203  | 8.281506  | 1.72092    |
| 1.521827  | 3.04982  | 0.056765   | 0.89849    | 3.842406   | -0.01759   | 1.230109  | 4.969284  | 0.338748   |
| 1.62654   | 3.024372 | 0.028542   | 1.180022   | 3.638764   | 0.636646   | 2.965178  | 5.795015  | 1.233079   |
| 0.669356  | 0.644794 | 0.926979   | 1.777587   | -0.62067   | 0.691254   | -0.57413  | -0.2058   | 1.314927   |

| Kidney_CLL | Kidney_HA | Kidney_LCI | Kidney_DD | Kidney_KLF | Lung_ICAM | Lung_SELE | Lung_IL6 | Lung_SOCS |
|------------|-----------|------------|-----------|------------|-----------|-----------|----------|-----------|
| 1.757071   | -2.03746  | 2.378557   | 2.361448  | 0.489429   | -0.68714  | -1.50876  | 0.204306 | -0.82252  |
| 0.510906   | -1.69005  | 3.423845   | 1.4562    | -0.36991   | -0.61917  | -1.44511  | 0.016329 | 0.060081  |
| 3.381325   | 4.49305   | 4.824846   | 3.931494  | 3.627354   | -0.75062  | -0.95399  | -0.16222 | 0.740208  |
| 2.69409    | -0.8035   | 2.406004   | 2.288696  | 0.996758   | 0.479399  | -1.80853  | -0.02301 | -0.50557  |
| 0.074099   | 1.288136  | 3.457289   | 1.737391  | 0.919004   | -0.20292  | -1.95278  | -1.34961 | 0.029417  |
| 6.287144   | 9.198212  | 15.01878   | 4.168976  | 1.542328   | 1.243162  | 3.713293  | 7.365181 | 3.36043   |
| 0          | 0         | 0          | 0         | 0          | 0         | 0         | 0        | 0         |
| 2.817207   | 3.914713  | 13.49524   | 1.413816  | -1.16079   | 3.510906  | 5.182539  | 6.67178  | 2.761604  |
| 2.986734   | -2.44232  | 3.22472    | 2.091066  | 0.417315   | 0.028225  | -0.97596  | -0.30757 | -0.51032  |
| 6.486385   | 5.242096  | 15.86073   | 4.604225  | 1.627916   | 1.441753  | 3.319386  | 8.352955 | 4.011662  |
|            |           |            |           |            | 2.728823  | 4.359463  | 6.157642 | 2.626589  |
| 1.065985   | 1.380398  | -1.53243   | -0.7556   | -1.41761   | -0.06133  | 1.100473  | -1.21055 | 0.520287  |
| 1.953306   | -0.1572   | -0.41642   | -0.22506  | -0.22244   | 0.20665   | 0.082458  | -0.50044 | 0.482883  |
| 2.370632   | 3.470436  | 11.41995   | 3.852043  | -0.2945    | 2.86767   | 4.216791  | 8.018751 | 5.196012  |
| 3.380064   | 5.458778  | 8.194359   | 0.94537   | -0.79039   | 4.926825  | 0.788792  | 2.818794 |           |
| 3.020029   | 7.453047  | 10.74889   | 2.080128  | -0.28526   | 1.012299  | 5.295628  | 9.856358 | 4.30744   |
| 1.094109   | 2.160469  | -2.04527   | 0.328133  | -0.71921   | -0.07698  | 1.056026  | -0.08562 | 0.484241  |
| 3.013639   | 5.304905  | 12.65423   | 2.642202  | 0.482241   | 2.422859  | 4.977522  | 7.746126 | 3.591244  |
| 0.470886   | 3.288378  | 2.888155   | 1.313278  | -1.34259   | 0.899441  | 0.231697  | 0.224194 | 0.563925  |
| 2.592793   | 3.525087  | 6.887873   | -0.29814  | 0.084646   | 0.066555  | 1.91721   | 0.345264 | 1.708279  |
| 0          | 0         | 0          | 0         | 0          | 0         | 0         | 0        | 0         |
| 1.61105    | 2.937048  | 0.379044   | -0.24475  | 0.353203   | 1.234756  | 2.85001   | 0.929882 | 1.795898  |
| 3.885937   | 7.094698  | 11.25391   | 0.939964  | 0.217281   | 1.234756  | 2.85001   | 6.68948  | 1.795898  |
| -1.66268   | 5.352796  | 7.832028   | -0.22812  | -0.86048   | 2.021196  | 5.683111  | 7.189274 | 2.613345  |
| 0.017148   | 5.793424  | 8.064004   | 1.280437  | -1.09461   | 1.168585  | 5.206066  | 6.595139 | 3.178481  |
| -2.36914   | 1.565579  | -2.99107   | 0.638259  | -0.51839   | 0.225922  | 0.753672  | 1.150141 | 1.706304  |
| -2.10899   | -0.15383  | -0.9176    | 0.489734  | -0.50726   | -0.03896  | 0.5905    | -0.09459 | 0.495494  |
| 0.768128   | 5.223773  | 8.533387   | -0.5885   | -1.14078   | 2.488873  | 6.650274  | 5.761091 | 1.842364  |
| 1.439263   | 4.432321  | 9.257689   | -1.22675  | -1.37018   | 1.65662   | 4.327301  | 6.405022 | 1.99615   |
| 0.597407   | 1.845489  | 8.845271   | 1.616508  | 0.455905   | 1.187998  | 4.331285  | 8.388226 | 3.499438  |
| 1.726069   | 0.29263   | 8.660691   | 2.37637   | 0.38309    | 1.808041  | 5.894041  | 12.31264 | 5.029502  |
| 1.77381    | 6.351104  | 8.796184   | -0.03313  | -0.67879   | 1.299618  | 5.176006  | 6.385067 | 2.273339  |
| 1.170096   | 6.183835  | 9.377906   | 0.200683  | -1.94986   | 2.45756   | 5.697594  | 6.259157 | 2.863194  |
| 2.90722    | 5.376613  | 11.00156   | 1.115617  | -1.26416   | 2.502142  | 5.192753  | 7.756954 | 4.494531  |
| -0.60467   | -0.9832   | -0.38228   | 1.748078  | 0.461223   | -0.63189  | 0.300316  | -0.74773 | 0.694575  |
| -0.5709    | 2.784495  | -0.28403   | -0.67322  | -1.13059   | -0.25553  | -0.03675  | -0.1955  | 0.29742   |
| 2.857985   | 7.611072  | 10.64488   | 0.531438  | -2.00253   | 0.459423  | 3.433197  | 9.834047 | 4.056365  |
| 0.962409   | 6.805753  | 9.181832   | 0.833747  | -1.91166   | 1.812653  | 4.563999  | 4.568018 | 2.525073  |
| 1.69774    | 7.525397  | 9.544759   | 0.046445  | -0.73306   | 1.727343  | 5.354656  | 7.029053 | 2.612523  |
| 2.108994   | 0.153829  | 0.917596   | 0.588504  | 0.507257   | -1.188    | -0.5905   | 0.094593 | -0.49549  |

| Lung_STAT | Lung_CEMI | Lung_F3  | Lung_RHOL | Lung_TSP1 | Lung_PLAT | Lung_PLAU | Lung_THBC | Lung_PLAU |
|-----------|-----------|----------|-----------|-----------|-----------|-----------|-----------|-----------|
| -0.51303  | -1.04048  | 0.011799 | -1.21777  | -0.86705  | -0.39313  | -0.03259  | -0.532    | -0.67819  |
| 0.784105  | -0.44266  | 0.007669 | 1.054527  | -0.26782  | 0.113747  | -0.08546  | -0.14759  | -0.14455  |
| -0.17619  | 0.129221  | 0.958202 | -0.53259  | 0.185009  | 0.446455  | -0.70843  | -0.18451  | 0.135521  |
| 0.236818  | -0.58404  | -0.0251  | 0.325029  | 0.016483  | -0.2438   | -0.64414  | -0.79063  | -0.82799  |
| 0.321852  | -0.96663  | -0.68232 | -0.18958  | -0.80285  | 0.412439  | -1.09     | 0.554453  | 0.315174  |
| 1.936457  | 4.427279  | 0.970203 | 1.82408   | -0.2372   | 2.799347  | -2.94683  | -2.78369  | 2.65287   |
| 0         | 0         | 0        | 0         | 0         | 0         | 0         | 0         | 0         |
| 0.369402  | 4.250795  | -0.0302  | 0.484602  | -0.69469  | 2.680826  | -0.7534   | -2.63347  | 1.391054  |
| -0.84673  | -0.3743   | -0.18903 | -0.30423  | -0.18911  | -0.73497  | -1.53819  | -0.80877  | -1.14342  |
| 1.290501  | 4.005737  | 0.236967 | 1.901178  | -0.54757  | 2.715126  | -2.12717  | -2.9168   | 1.748262  |
| 0.447203  | 3.818916  | 0.1486   | 0.880281  | -0.63651  | 3.173239  | -3.30982  | -2.26648  | 0.984423  |
| -0.80672  | -1.01861  | -0.81252 | -0.73119  | -0.11635  | -0.95758  | -1.08069  | -0.45581  | -0.70846  |
| 0.115849  | -0.00041  | -0.65718 | -0.08854  | 0.888885  | -0.24652  | -0.299    | 0.437859  | 0.066486  |
| 2.087835  | 3.928976  | 0.053917 | 2.596869  | 1.545248  | 2.253874  | -1.15507  | -2.79553  | 2.920994  |
|           |           | -1.73866 | -1.09331  | 0.619045  | 1.056835  | -1.42034  | -2.04693  | 0.288307  |
| 1.539265  | 3.942833  | 0.764925 | 1.803627  | 2.356943  | 1.785736  | -1.68516  | -2.49492  | 3.260075  |
| 0.021162  | -0.76459  | -0.5348  | -0.30973  | 0.274252  | 0.016911  | 0.029358  | 0.142355  | -0.44252  |
| 0.994858  | 5.055891  | -0.3698  | 0.766964  | -0.00966  | 2.686348  | -0.66326  | -2.38802  | 2.214058  |
| 0.819851  | 0.100994  | -0.4645  | 0.338408  | 0.177555  | 0.102636  | 1.379364  | 0.879654  | 0.512617  |
| 1.015961  | 1.224075  | -0.61025 | 0.775684  | 1.436459  | 0.741722  | -2.04996  | -0.44756  | 0.57234   |
| 0         | 0         | 0        | 0         | 0         | 0         | 0         | 0         | 0         |
| 0.139164  | 0.663322  | -0.22843 | 0.219658  | 0.760326  | 0.089741  | 0.375034  | 0.125143  | -0.09308  |
| 1.283007  | 3.89146   | -0.43203 | 0.89542   | -0.28599  | 3.124443  | -0.45738  | -2.06985  | 1.789692  |
| 1.511287  | 3.666103  | -0.21962 | 1.477282  | -0.24882  | 2.578872  | -0.211    | -1.07567  | 1.111712  |
| 1.222436  | 3.869551  | 0.439362 | 1.805384  | -0.0421   | 2.890922  | -1.40895  | -1.95249  | 1.999269  |
| 0.314351  | 1.369469  | 0.30422  | 0.811558  | 1.325111  | -0.70423  | 0.082566  | -0.05174  | 0.887848  |
| 0.645082  | -0.97948  | 1.028904 | 0.863958  | 0.147179  | -0.37852  | 0.347781  | 1.0622    | -0.04268  |
| 1.269015  | 4.406046  | 0.910276 | 1.751255  | 0.810862  | 3.994925  | -0.79327  | -1.11824  | 2.205053  |
| 0.800366  | 3.174648  | 0.012178 | 1.155012  | -0.68688  | 2.854224  | -1.17884  | -2.06902  | 1.188776  |
| 1.226539  | 4.594278  | 0.277498 | 1.411217  | -0.12139  | 3.884271  | -1.63865  | -1.86961  | 2.480869  |
| 2.429957  | 5.725391  | 1.970886 | 3.853239  | 2.902803  | 3.686334  | -0.79926  | -1.44224  | 4.056137  |
| 0.230706  | 2.860468  | -0.04477 | 0.207571  | -0.7505   | 3.482285  | -1.71254  | -2.15991  | 2.094957  |
| 1.454148  | 3.307335  | 0.91802  | 0.823383  | -0.07635  | 3.310376  | 0.210916  | -1.16567  | 2.046082  |
| 2.03194   | 5.684864  | 2.053936 | 1.911196  | 0.419283  | 4.600175  | -0.17948  | -1.35328  | 3.138992  |
| 0.550071  | -0.35944  | 0.975042 | 0.694309  | 0.330837  | 2.14956   | 0.420096  | 0.998099  | 0.788137  |
| 0.33895   | -0.16775  | 0.546862 | -0.24532  | -0.45974  | 1.709382  | -0.78238  | 0.308431  | 0.352381  |
| 2.325112  | 4.955278  | 2.282408 | 1.944246  | 1.046949  | 3.415317  | -1.08928  | -2.77069  | 3.434959  |
| 1.229407  | 4.189312  | 0.338455 | 0.6115    | 0.811377  | 3.015821  | -1.3626   | -0.98838  | 1.49122   |
| 0.646678  | 4.7164    | -0.27512 | 0.640079  | 0.725328  | 2.979566  | -1.84352  | -1.32501  | 1.752592  |
| -0.64508  | 0.979475  | -1.0289  | -0.86396  | -0.14718  | 0.378522  | -0.34778  | -1.0622   | 0.042677  |



| Lung_PTGS | Lung_VWF | Lung_PROC | Lung_CD44 | Lung_TFPIA | Lung_TFPIE | Lung_TFPIC | Lung_SELP | Lung_C5AR |
|-----------|----------|-----------|-----------|------------|------------|------------|-----------|-----------|
| 0.066343  | -0.30875 | 0.662714  | 0.18799   | 0.573853   | 0.48921    | 0.612982   | -1.6524   | -1.38344  |
| 0.689711  | 1.034357 | 0.711302  | -0.14554  | 0.780048   | 0.354557   | 0.657555   | 0.658291  | -1.05216  |
| 0.869833  | -0.2571  | 0.340195  | 0.940752  | 0.113155   | 0.201492   | 0.004425   | 0.581978  | 2.289011  |
| 1.391691  | 1.093735 | 0.445307  | -0.4509   | 0.831066   | 0.596565   | 0.501402   | 1.984949  | -0.10718  |
| 0.154221  | 0.700768 | 0.042168  | -0.6853   | 0.691109   | 0.63402    | 0.054382   | -0.11165  | -0.21742  |
| 1.538973  | -2.76149 | 3.751825  | 0.579416  | 0.123928   | -1.81126   | 0.433792   | 6.628151  | 2.925356  |
| 0         | 0        | 0         | 0         | 0          | 0          | 0          | 0         | 0         |
| 3.15675   | -1.7523  | 2.90612   | -0.29273  | -0.42763   | -2.22748   | -0.37578   | 5.452446  | 2.902052  |
| 0.92651   | 0.321123 | -0.11281  | 0.866581  | -0.08209   | -0.21033   | -0.33698   | -0.06801  | -0.00963  |
| 1.457428  | -2.60995 | 2.54472   | -0.01081  | -0.38913   | -3.26611   | -0.06496   | 5.644602  | 2.759741  |
| 1.835438  | -2.08575 | 2.496641  | -0.16373  | -0.21961   | -1.62371   | -0.40316   | 4.130268  | 3.24749   |
| 0.633482  | -0.05759 |           | -0.1007   | 0.299458   | 0.226797   | -0.01024   | 0.967531  | 0.014708  |
| 0.086422  | -0.25659 |           | 0.277033  | 0.457756   | 0.211803   | -0.32771   | 0.867434  | -0.63632  |
| 1.46615   | -1.54161 |           | 0.80056   | -0.79005   | -2.34153   | -0.56349   | 5.791674  | 3.643564  |
| 0.265606  | -1.62831 |           | -0.63953  | -0.05073   | -0.71282   | -0.62263   | 4.626442  | 0.779114  |
| 0.617413  | -2.61956 |           | 0.994555  | -0.78767   | -2.91483   | -0.86444   | 6.7316    | 3.060442  |
| -0.02176  | -0.24668 |           | -0.39298  | 0.081514   | -0.03861   | -0.03226   | 1.561321  | -0.80377  |
| 2.853832  | -0.87117 |           | 0.114199  | -0.62868   | -2.49693   | -0.70733   | 4.553501  | 2.852236  |
| 0.98444   | 0.91699  |           | -0.68532  | -0.29265   | -0.07059   | -0.28156   | -0.1307   | 1.064346  |
| 0.306705  | 1.321371 |           | -0.45333  | 0.425938   | -0.31871   | 0.198492   | 2.407709  | 1.709707  |
| 0         | 0        |           | 0         | 0          | 0          | 0          | 0         | 0         |
| 1.286263  | 0.190756 |           | 0.813168  | -0.35707   | -0.31335   | -0.44106   | -0.05883  | 0.255848  |
| 1.777416  | -1.12015 |           | 0.626358  | -0.16112   | -1.7985    | -0.17436   | 4.780209  | 3.710514  |
| 2.3388    | -1.54481 | 3.084693  | 0.238804  | 0.204016   | -1.30098   | -0.06867   | 5.100382  | 0.479641  |
| 1.851198  | -1.5233  | 3.186679  | 1.013945  | -0.69988   | -1.62287   | -0.47195   | 5.456518  | 1.903774  |
| 0.838068  | 0.602166 | 1.357953  | 1.737534  | 0.383406   | -0.34869   | 0.607638   | -0.32473  | -2.76035  |
| 1.038643  | 1.188611 | 0.673285  | 1.737255  | 1.265875   | 0.477373   | 1.089961   | 0.681263  | 0.663336  |
| 1.650146  | -1.03678 | 3.745984  | 1.605932  | -0.50478   | -0.82394   | 0.073897   | 4.622591  | 3.364872  |
| 1.370916  | -2.17833 | 3.315976  | 0.692583  | 0.598614   | -1.15001   | 0.099145   | 5.516539  | -0.19826  |
| 1.981218  | -1.32744 | 5.188476  | 1.928625  | -0.201     | -3.08954   | -0.78011   | 6.340336  | 2.448786  |
| 3.311722  | -1.62839 | 4.207038  | -1.38507  | -2.35964   | -2.46638   | 0.27665    | 6.685545  | 0.655064  |
| 1.619427  | -2.50147 | 4.96931   | -0.71838  | 0.096853   | -2.95249   | -2.59065   | 7.287344  | 2.789034  |
| 2.003138  | -1.123   | 3.409362  | 1.087776  | -0.41751   | -1.21717   | 0.542808   | 5.461582  | 1.389004  |
| 1.914873  | -2.04486 | 4.82001   | 1.748438  | 0.249067   | -2.63637   | -0.16136   | 7.246729  | 1.42128   |
| -0.19331  | 0.729316 | 2.23033   | 1.731071  | 1.096188   | 0.420609   | -0.14708   | 0.41856   | 0.959774  |
| -0.22695  | 0.614524 | 0.638238  | 0.477419  | 0.951208   | 0.466568   | 0.107013   | 0.47047   | 0.335083  |
| 1.522041  | -3.31107 | 3.999705  | 1.450468  | -0.28625   | -2.10018   | 0.372663   | 6.105783  | -1.34118  |
| 1.260208  | -1.17589 | 2.511163  | 0.050514  | 0.646271   | -0.62008   | -0.53397   | 4.304363  | -0.04172  |
| 0.708193  | -2.18176 | 2.250936  | -0.50635  | -1.27155   | -0.90175   | -0.65889   | 2.587709  | 1.907967  |
| -1.03864  | -1.18861 | -0.67329  | -1.73726  | -1.26587   | -0.47737   | -1.08996   | -0.68126  | -0.66334  |

| Lung_VEGF | Lung_SERP | Lung_STAT | Lung_OASL | Lung_OAS2 | Lung_OASL | Lung_OAS3 | Lung_FOS | Lung_MX1 |
|-----------|-----------|-----------|-----------|-----------|-----------|-----------|----------|----------|
| -2.25532  | -1.20062  | -0.29811  | -0.63653  | -0.52837  | -0.07624  | -1.23551  | -0.66652 | 0.014009 |
| 0.20521   | -0.99723  | 0.103857  | 0.615911  | 1.17403   | 0.777195  | 0.796541  | -0.08331 | 1.151705 |
| -1.33574  | -0.55761  | -0.30867  | 0.075024  | 0.500589  | 0.591736  | 0.716629  | -0.2593  | -0.58858 |
| 1.110395  | -0.67363  | 0.435986  | 0.02564   | 0.130119  | 0.411043  | -0.25927  | -0.05845 | 0.346544 |
| -0.28484  | -0.13795  | 0.216385  | 1.125238  | 1.368671  | 0.799213  | 0.668318  | -0.51401 | -0.27088 |
| -1.10476  | 4.381271  | 1.665787  | 3.180634  | 1.505859  | 2.074116  | 2.541866  | 0.465672 | 3.198833 |
| 0         | 0         | 0         | 0         | 0         | 0         | 0         | 0        | 0        |
| -2.73628  | 4.301022  | 1.347277  | 3.198051  | 1.966993  | 2.070837  | 3.440439  | -0.67916 | 2.390028 |
| -1.66442  | -0.73884  | -0.3913   | -0.74618  | -0.49572  | -0.32963  | -1.12264  | -0.34158 | -0.53921 |
| -2.4743   | 2.690945  | 2.140287  | 4.505756  | 2.506346  | 2.471949  | 3.095417  | 0.876358 | 4.970711 |
| -2.33469  | 3.471811  | 1.356583  | 3.468866  | 2.002218  | 2.430719  | 3.418871  | -1.60174 | 2.515692 |
| -0.58231  | 0.039549  | 0.058992  | 0.373892  | 0.836727  | 0.076809  | 0.440111  | 1.750746 | -0.42766 |
| 0.04497   | 0.743774  | 0.342148  | 0.187078  | 0.712738  | 0.475697  | 0.29772   | 1.143021 | -0.40812 |
| -0.63103  | 3.491032  | 2.515886  | 6.545265  | 3.185061  | 2.822908  | 3.971767  | 3.44165  | 6.321167 |
| -2.32185  | 4.391897  | 1.497362  | 3.184113  | 2.427361  | 2.461298  | 3.240459  | 1.929714 | 2.564716 |
| -1.92056  | 4.405962  | 2.11554   | 7.036224  | 2.944748  | 2.358932  | 4.340538  | 3.716238 | 6.000229 |
| -0.43391  | 0.317064  | 0.038643  | 0.188856  | 0.500652  | 0.334988  | -0.63326  | 1.544653 | 0.062103 |
| -0.53659  | 4.571581  | 1.921352  | 4.246325  | 2.05529   | 2.932711  | 4.068764  | 2.874718 | 3.857328 |
| 0.20228   | 0.058704  | 0.561741  | 1.205669  | 1.068287  | 0.957706  | 1.235126  | 1.180984 | 1.447004 |
| -0.37187  | 1.160564  | -0.11058  | -0.11476  | 0.857944  | 0.553724  | 1.63015   | 2.749489 | -0.80583 |
| 0         | 0         | 0         | 0         | 0         | 0         | 0         | 0        | 0        |
| 0.073397  | 0.126076  | -0.19437  | 0.605982  | 0.222996  | 0.220549  | -0.21231  | 1.798815 | -0.07649 |
| -0.4289   | 4.723953  | 2.163992  | 4.305941  | 2.829391  | 2.920273  | 4.895182  | 2.535851 | 3.070181 |
| -2.5795   | 4.685426  | 1.546764  | 3.682835  | 2.541822  | 2.983522  | 3.244979  | 2.655644 | 2.512338 |
| -3.22433  | 4.552865  | 1.867785  | 3.632946  | 2.410328  | 2.764263  | 2.418006  | 2.185529 | 2.65167  |
| -0.59593  | 1.012351  | 1.434368  | 1.136503  | 1.38582   | 1.535299  | 0.717496  | 2.450997 | 1.837174 |
| 0.504402  | 0.737296  | 0.825563  | 0.990917  | 0.958347  | 0.530523  | 0.67463   | 0.994134 | 0.848147 |
| -1.12155  | 5.93101   | 2.558447  | 3.855085  | 2.90078   | 3.437714  | 1.843331  | 1.857865 | 3.234567 |
| -1.56607  | 4.671979  | 1.752056  | 2.957809  | 2.191259  | 2.620207  | 1.997191  | 1.258086 | 2.472018 |
| -1.95569  | 6.258279  | 5.445702  | 7.325218  | 5.376686  | 5.721621  | 3.173686  | 4.815396 | 6.558381 |
| -2.53528  | 4.990552  | 4.053436  | 7.869223  | 4.139456  | 3.745918  | 3.729926  | 4.769273 | 7.433282 |
| -1.71306  | 5.515738  | 2.373362  | 3.565256  | 3.267864  | 3.161163  | 2.016181  | 2.898126 | 3.19711  |
| -1.01324  | 4.923808  | 2.254465  | 2.383436  | 2.338133  | 2.930025  | 2.037532  | 1.039895 | 1.734712 |
| -0.40333  | 4.5677    | 3.371281  | 4.247047  | 2.584507  | 3.396654  | 2.741635  | 2.425221 | 4.758327 |
| 0.862383  | 2.339847  | 3.061172  | 2.264214  | 2.927406  | 2.675659  | 0.705777  | 2.248446 | 0.751576 |
| -1.10408  | 0.159484  | 1.231421  | 1.393646  | 1.281086  | 1.369051  | -0.90296  | 0.242871 | 0.634728 |
| -1.38346  | 4.899325  | 1.468987  | 3.74535   | 1.60515   | 2.171541  | 3.271285  | 2.714145 | 3.614207 |
| -3.70331  | 4.568688  | 1.890629  | 3.414524  | 2.521643  | 2.875835  | 3.117669  | 0.994407 | 2.534532 |
| -2.35034  | 4.688132  | 1.125086  | 2.875856  | 2.208115  | 2.190144  | 2.257794  | 0.681565 | 1.794206 |
| -0.5044   | -0.7373   | -0.82556  | -0.99092  | -0.95835  | -0.53052  | -0.67463  | -0.99413 | -0.84815 |

| Lung_IL18 | Lung_IRF1 | Lung_IRF7 | Lung_IRF8 | Lung_CXCL | Lung_CXCL | Lung_IFIH1 | Lung_DDX <sup>E</sup> | Lung_KLF2 |
|-----------|-----------|-----------|-----------|-----------|-----------|------------|-----------------------|-----------|
| 0.322763  | 0.091566  | -0.13216  | -0.13342  | -1.65371  | 1.809511  | 0.26893    | -0.15213              | -0.41366  |
| 0.317965  | 0.063927  | 0.513094  | 0.281738  | -0.61478  | 1.032038  | 0.467869   | 0.21245               | -0.71003  |
| 0.617321  | -0.00742  | -0.19653  | -0.68502  | 0.055487  | 0.113106  | 0.075428   | -0.02247              | 0.130033  |
| 0.047571  | 0.533134  | 0.324574  | 0.231766  | -1.82571  | 0.296251  | 0.520851   | 0.459885              | -0.02106  |
| 0.209225  | 0.27931   | 0.608604  | -0.33717  | 0.125412  | -0.14164  | 0.434898   | 0.40444               | -0.24352  |
| -0.64494  | 0.874138  | 3.586357  | 0.504564  | 4.912693  | 9.213177  | 1.37216    | 0.698244              | -0.39483  |
| 0         | 0         | 0         | 0         | 0         | 0         | 0          | 0                     | 0         |
| -0.80796  | 0.833914  | 3.231615  | -0.30738  | 5.272484  | 8.23378   | 1.156273   | 0.954697              | -0.66678  |
| 0.180542  | -0.21646  | -0.56178  | -0.36162  | -1.39461  | -1.0628   | -0.0125    | -0.34069              | -0.6722   |
| -1.20571  | 1.917509  | 4.114174  | 0.955481  | 5.345842  | 10.72459  | 1.871796   | 1.218136              | -0.3526   |
| -0.29411  | 0.704407  | 3.427227  | -0.4835   | 4.658302  | 8.699492  | 1.334953   | 0.857353              | -0.97876  |
| -0.14849  | 0.090096  | -0.42433  | 0.283827  | -1.235    | -0.59643  | 0.503395   | 0.861765              | 0.079369  |
| -0.48893  | 0.076918  | -0.20847  | 0.120121  | -0.29892  | -0.30324  | 0.562923   | 0.836254              | -0.44392  |
| -0.85732  | 2.723038  | 3.990625  | 1.798109  | 9.017725  | 10.85167  | 2.337395   | 2.109247              | 1.340347  |
| -0.33286  | 0.581955  | 3.968485  |           | 7.382212  | 7.285721  | 1.399206   | 1.314837              | -1.28638  |
| -1.15537  | 1.824093  | 4.391897  | 1.659199  | 11.25144  | 10.85554  | 2.090113   | 1.734888              | 0.757179  |
| -0.07276  | 0.029924  | 0.557196  | 0.126518  | 0.475266  | -0.74554  | 0.225557   | 0.371172              | -0.90206  |
| -0.4953   | 1.375633  | 4.046986  | 0.883257  | 8.012733  | 10.72135  | 1.609838   | 1.219316              | 1.936146  |
| 0.661978  | -0.01838  | 1.453131  | 0.22127   | 2.494762  | 0.443451  | 0.517029   | 0.283974              | 1.502903  |
| -0.861    | 0.106644  | -0.19848  | -0.50809  | 3.351601  | -1.05272  | 0.189196   | 0.113379              | 0.74283   |
| 0         | 0         | 0         | 0         | 0         | 0         | 0          | 0                     | 0         |
| 0.458378  | -0.31367  | 0.076651  | -0.18803  | 1.275023  | -0.51393  | -0.1172    | -0.16991              | 0.685184  |
| -0.73705  | 1.057592  | 3.576998  | 0.532995  | 7.173359  | 9.711451  | 1.930325   | 1.957624              | 2.313793  |
| -0.01406  | 0.623747  | 4.25771   | 0.219824  | 2.274023  | 5.732772  | 1.268022   | 1.112663              | 2.416012  |
| -0.78798  | 0.422405  | 3.966089  | 0.286589  | 3.074734  | 5.176711  | 0.981742   | 0.711203              | -0.54845  |
| 0.749286  | -0.6414   | 0.128128  | -0.59156  | -0.60296  | 0.033772  | -0.27476   | -0.43695              | 0.205532  |
| 0.672072  | -0.23629  | 0.093878  | -0.29718  | 0.837635  | 0.434434  | -0.40918   | -0.30779              | -0.11786  |
| 0.100644  | 0.119225  | 3.543144  | -0.21478  | 1.346941  | 3.660798  | 0.794337   | 0.489363              | 1.257046  |
| -0.70898  | 0.017056  | 3.57662   | -0.07338  | 2.479713  | 5.016572  | 0.732892   | 0.150713              | -0.39227  |
| 0.746274  | 1.570963  | 3.386606  | 1.562729  | 4.858551  | 6.482692  | 2.284846   | 1.554861              | -4.23071  |
| -0.13837  | 2.969131  | 2.794878  | 2.79545   | 6.270304  | 8.006883  | 3.03807    | 2.77446               | 2.961834  |
| 0.099704  | -0.2676   | 2.877684  | 0.255318  | 4.007782  | 4.80618   | 0.806878   | 0.346273              | 2.129389  |
| 0.174607  | 0.041809  | 3.639488  | 0.071255  | 1.228159  | 3.66735   | 0.592637   | 0.345196              | -0.66261  |
| 0.156253  | 1.371668  | 3.878004  | 1.088137  | 4.345003  | 6.568391  | 1.485425   | 1.296049              | 3.153347  |
|           | 0.235857  | 0.670759  | -0.02005  | -1.43229  | 0.267838  | 0.24071    | 0.226742              | 2.796049  |
| 0.349273  | -0.52015  | -0.04786  | -0.53661  | -0.60528  | 0.455205  | -0.3042    | -0.67141              | 1.776672  |
| -1.44006  | 1.470282  | 3.795326  | 2.209362  | 5.463575  | 6.876754  | 1.225192   | 0.846418              | 2.61795   |
| -0.14618  | 0.268057  | 3.998457  | 0.069086  | 1.998632  | 3.834901  | 0.592074   | 0.706936              | 2.235977  |
| -1.22611  | 0.310179  | 3.599628  | -0.1628   | 1.960403  | 3.941318  | 0.708371   | 0.661503              | 1.272533  |
| -0.67207  | 0.23629   | -0.09388  | 0.297176  | -0.83764  | -0.43443  | 0.409183   | 0.307791              | 0.117859  |

| Liver_ICAM | Liver_SELE | Liver_IL6 | Liver_SOCS | Liver_STAT | Liver_CEM | Liver_F3 | Liver_RHO | Liver_TSP1 |
|------------|------------|-----------|------------|------------|-----------|----------|-----------|------------|
| 0.134438   | 0.192612   | -1.53181  | -0.03926   | -1.00434   | -2.35918  | 2.305107 | 1.435249  | 0.045464   |
| -0.58114   | -0.04835   | 0.036179  | 0.763916   | 0.333153   | 0.808102  | 0.760393 | 0.225193  | 1.00596    |
| 0.022757   | 0.452932   | -0.55338  | 0.680624   | 1.436432   | -2.10987  | 0.430883 | 1.68655   | -0.29113   |
| 0.447216   | -1.18509   | 0.704247  | -0.1163    | 0.232601   | -2.38444  | 1.719448 | 1.242739  | 0.660194   |
| -0.23057   | -0.4091    | -0.53659  | -1.76798   | -0.27834   | 0.660267  | -0.38177 | 0.978613  | 0.766232   |
| 2.85297    | 0.937992   | 3.774815  | 4.927717   | 1.062023   | 5.705448  | -1.2565  | -0.18683  | 0.853441   |
| 0          | 0          | 0         | 0          | 0          | 0         | 0        | 0         | 0          |
| 0.629782   | -0.05797   | 0.043112  | -0.05425   | 0.398714   | 0.940287  | -0.54966 | 0.561653  | -0.43678   |
| 2.239267   | -0.09941   | 2.382437  | 3.601738   | 0.425369   | 4.835032  | -1.41057 | -0.6404   | -0.18639   |
| 2.993464   | 0.462931   | 3.840715  | 4.85465    | 1.050423   | 6.01259   | -0.8243  | -0.5229   | 0.268681   |
| 1.867887   | 0.41749    | 1.251749  | 3.269682   | -0.44289   | 2.197523  | -2.60499 | -1.39635  | -1.48703   |
| 0.437616   | -1.04453   | 1.302492  | 3.141729   | 0.930691   | 1.081533  | -0.91315 | 0.556438  | -1.91973   |
| 0.972414   | -0.80232   | 1.494547  | 3.22089    | 1.103371   | 2.268457  | -0.53333 | 1.520699  | 0.349491   |
| 3.928272   | 2.680834   | 6.199553  | 6.429426   | 1.487377   | 5.852024  | -0.62277 | -0.38333  | 1.433561   |
| 2.978481   | 1.213512   | 2.487476  | 4.946543   | 0.750921   | 1.159672  | -1.04435 | 0.415701  | -0.35608   |
| 3.916895   | 2.35931    | 7.003735  | 6.466637   | 1.873302   | 6.095951  | 0.113077 | 0.405239  | 3.010353   |
| 0.018827   | 0.129225   | -0.13206  | 1.488516   | 0.07802    | 0.587084  | 0.182892 | 0.193346  | -1.64026   |
| 3.407925   | 0.230425   | 6.700598  | 5.954681   | 0.767387   | 5.562553  | -1.18797 | 0.034468  | 0.473499   |
| 1.170818   | -1.78465   | 0.32552   | 0.51012    | 0.184792   |           | 0.232107 | 0.338764  | -1.17487   |
| -1.6118    | -0.67191   | 0.276915  | 4.253107   | 0.261902   | 5.268505  | -1.3781  | -0.36317  | 0.035486   |
| 0          | 0          | 0         | 0          | 0          | 0         | 0        | 0         | 0          |
| 0.013939   | -2.5404    | 0.190319  | 1.961992   | 0.142563   | -0.15932  | -0.06266 | 0.104622  | -1.88965   |
| 2.277514   | -0.02656   | 4.129902  | 4.983885   | -0.23649   | 2.698072  | -2.91407 | -1.10175  | -1.4474    |
| 1.909697   | 0.769535   | 2.25588   | 2.788642   | -0.16633   | -1.99817  | -1.35896 | -1.14001  | 0.873483   |
| 1.082699   | 1.629038   | 1.389565  | 3.302098   | 0.463883   | 0.978291  | -2.13811 | -1.68262  | 1.207543   |
| -0.06426   | 0.970028   | 0.390978  | 0.966641   | 0.294555   | 0.881247  | -0.91856 | 0.929865  | 1.492429   |
| 0.4688     | -1.60938   | -0.71508  | -0.105     | 0.199508   | 0         | -0.37132 | -0.32291  | -0.36025   |
| 2.578995   | 1.023035   | 1.626858  | 1.424767   | -0.9806    | -3.13028  | -1.59442 | -1.79834  | -0.14371   |
| 2.528852   | 2.140991   | 3.5142    | 3.253379   | 0.055617   | -0.58946  | -0.48694 | -0.45655  | 0.804345   |
| 4.491749   | 3.958673   | 4.874016  | 3.812186   | -0.28203   | 2.933744  | -1.17086 | -1.94436  | 1.661738   |
| 4.873938   | 5.645809   | 7.026979  | 6.352304   | 1.760079   | 4.984541  | 0.554679 | 1.562222  | 4.03756    |
| 2.160143   | 1.510172   | 2.361444  | 2.817124   | -0.70692   | 2.061031  | -1.32832 | -1.55456  | 1.239253   |
| 0.4582     | 1.297699   | 1.286745  | 2.310676   | -1.65597   | -1.5648   | -1.90402 | -1.95471  | -1.55727   |
| 3.347286   | 1.846107   | 3.832672  | 3.705352   | -0.81701   | 2.067366  | -0.26049 | -1.73685  | 1.385262   |
| 0.305685   | 1.323917   | 1.776052  | 1.230468   | 0.145551   | 0.246775  | 0.321675 | 0.236273  | 0.767627   |
| 0.306412   | -0.6555    | 0.73592   | 1.392337   | -0.07084   | -1.85938  | 1.161414 | -0.85873  | -0.33203   |
| 4.419186   | 2.923441   | 6.092335  | 5.723077   | 0.844367   | 4.657385  | -0.32996 | 1.041618  | 2.252389   |
| 2.499973   | 1.145319   | 2.992512  | 3.999314   | 0.262382   | 0.776707  | -0.85224 | -0.72132  | 0.946374   |
| 0.692875   | 1.793409   | 1.539165  | 3.606835   | 0.084952   | -2.20616  | -1.28686 | -0.78449  | 0.739831   |
| -0.4688    | 1.609385   | 0.715084  | 0.104999   | -0.19951   |           | 0.371324 | 0.322906  | 0.360246   |

| Liver_PLAT | Liver_PLAU | Liver_THBC | Liver_PLAU | Liver_ET1 | Liver_PTGS | Liver_VWF | Liver_PRO | Liver_CD44 |
|------------|------------|------------|------------|-----------|------------|-----------|-----------|------------|
| 0.600952   | 0.633568   | -0.12667   | -1.00417   | 0.107891  | -1.3258    | 1.419785  | -0.496    | -2.89417   |
| 0.298569   | 0.601242   | -0.56931   | 2.069584   | 1.632851  | 1.106098   | 2.340246  | 0.355541  | -0.31989   |
| -1.53143   | -2.32231   | 0.711897   | -0.31993   | 1.105143  | -1.0765    | 1.068254  | -0.98574  | -2.38693   |
| -1.90229   | -1.24501   | -0.5092    | -1.30728   | 0.337505  | 1.523796   | 0.212078  | 1.671022  | -1.92597   |
| -0.41386   | 0.141804   | 1.341091   | 0.01083    | 0.862736  | 1.111481   | 1.640676  | -0.96684  | -2.16986   |
| 1.386497   | -0.9319    | 2.704594   | 3.742693   | 2.79525   | 3.577797   | -1.44049  | 3.175478  | 1.371834   |
| 0          | 0          | 0          | 0          | 0         | 0          | 0         | 0         | 0          |
| 0.967131   | 0.367376   | -0.33932   | -0.26277   | 1.612434  | 1.999506   | 1.176706  | 1.454575  | -0.20961   |
| 0.399065   | -0.43217   | 2.449608   | 2.338251   | 1.281984  | 3.07733    | -1.08901  | 3.434866  | -1.74804   |
| 1.221567   | -1.3624    | 1.227701   | 3.074333   | 2.496693  | 6.641222   | -0.64499  | 3.389751  | 0.633095   |
| -1.65137   | -3.0874    | 1.147249   | 1.136635   | 0.28796   | 1.68371    | -1.37528  | 3.808889  | 0.759605   |
| 1.101118   | -1.46323   | -0.17797   | -1.20107   | 1.287678  |            | 1.293224  | -0.63157  |            |
| 0.669941   | -0.28563   | 1.049576   | 0.12813    | 1.501245  |            | 0.665695  | -0.54632  |            |
| -0.49422   | -0.7767    | 2.23794    | 4.770363   | 3.292469  |            | -0.28324  | -0.07425  |            |
| 2.435057   | 0.324707   | 2.311651   | 2.233738   | 1.578081  |            | -0.30788  | 3.159504  |            |
| 0.805717   | -1.29817   | 1.679293   | 5.409969   | 5.768402  |            | 1.112383  | 4.194666  |            |
| 0.304462   | -1.06288   | 0.337868   | -1.80176   | 0.372641  |            | -0.65922  | 0.786434  |            |
| 0.235992   | -0.93458   | 1.231443   | 3.224895   | 1.993525  |            | 0.074518  | 4.820974  |            |
| 0.146914   | 1.125637   | 0.559374   | -0.14348   | 1.058382  |            | 1.192116  | 1.040665  |            |
| -0.56327   | -1.20153   | 1.462076   | 1.090467   | -0.24836  |            | 0.948254  | 1.624664  |            |
| 0          | 0          | 0          | 0          | 0         |            | 0         | 0         |            |
| 0.519361   | -0.88229   | -0.21919   | -1.58746   | 0.146835  |            | 0.292976  | 0.272509  |            |
| -0.03434   | -2.90153   | 1.777735   | 1.690693   | 0.43206   |            | -2.2236   | 2.247162  |            |
| 0.442167   | -1.98882   | 2.089911   | 0.334362   | 0.670271  | 0.500095   | -2.42385  | 3.380147  | -1.74046   |
| 0.43618    | -0.69048   | 1.415562   | 0.784479   | -0.52066  | 1.967066   | -2.44417  | 1.857547  |            |
| -2.68043   | 0.536463   | 0.462574   | -1.74683   | -0.97541  | -0.23101   | 0.200583  | 0.429561  |            |
| -4.64118   | -1.99241   | 0.644686   | -2.81395   | -0.29762  | -0.25319   | -0.10852  | 0.202548  | 0.096145   |
| -0.67128   | -2.53201   | 0.898802   | 0.070528   | 0.779289  | -0.26907   | -2.8743   | 2.643537  | -3.40917   |
| 3.701214   | -1.59509   | 2.456373   | 1.414236   | 1.725229  | 2.191856   | -0.79595  | 4.207513  | -1.51178   |
| -0.71317   | -0.97581   | 2.226681   | 1.860922   | 2.300667  | 4.929186   | -1.70544  | 4.474847  | -0.42305   |
| 3.207153   | 0.030115   | 2.415071   | 4.809357   | 4.300032  | 7.673098   | 1.519559  | 3.784446  | 2.192163   |
| 0.657698   | -2.30319   | 0.789532   | 1.137157   | 0.510891  | 1.510393   | -2.4264   | 2.253631  | -1.52577   |
| 2.480835   | -3.17033   | 1.60754    | -0.78212   | -0.05242  | -1.21291   | -3.54283  | 1.903354  | -3.33631   |
| 3.664017   | -1.77638   | 1.331993   | 1.927662   | 1.76383   | 1.754753   | -0.47045  | 4.819821  | -1.55527   |
| 3.667269   | -0.38236   | 1.454617   | -1.38397   | -0.34768  | -2.92538   | 0.42397   | 1.016345  | -0.53443   |
| 0.675585   | -1.79737   | -0.31541   | -1.93572   | -0.74416  | 0.923826   | -0.29876  | -0.00876  |            |
| 3.607878   | -0.90459   | 2.688269   | 2.310381   | 3.357351  | 5.694397   | -1.08036  | 4.436751  | -0.16339   |
| 2.920835   | 0.279652   | 1.576521   | -0.11691   | 0.828171  | 0.87295    | -0.76062  | 3.091054  | -4.11112   |
| 3.280098   | -0.94452   | 2.543079   | 0.314302   | 0.456161  | 0.259859   | -1.36373  | 2.74347   |            |
| 4.641176   | 1.992409   | -0.64469   | -1.38647   | 0.297623  | 0.253187   | 0.108518  | -0.20255  | -0.09614   |

| Liver_TFPIA | Liver_TFPIE | Liver_TFPIK | Liver_SELPL | Liver_C5AR | Liver_VEGF | Liver_SERP | Liver_STAT | Liver_OASL |
|-------------|-------------|-------------|-------------|------------|------------|------------|------------|------------|
| 0.611694    | 0.754799    | 0.637129    | 0.954575    | -0.69623   | 0.721827   | -0.63098   | 2.472965   | 0.675558   |
| 1.248743    | 1.276073    | 0.705894    | 4.514338    | 2.170406   | -0.02917   | 0.539871   | 1.665136   | 1.954882   |
| 0.560665    | 1.049503    | -0.27603    | 2.233942    | 0.074013   | 0.603123   | -1.10657   | 2.552603   | 0.57795    |
| 2.424864    | 2.566338    | 2.086939    | 4.000574    | -0.77014   | -0.72399   | 0.274385   | 2.130299   | -0.68539   |
| 1.297453    | 0.933544    | 0.124998    | 3.572058    | -1.07566   | -0.04918   | -0.68032   | 1.248423   | 1.506887   |
| -0.00723    | -1.48107    | 0.592825    | 6.631907    | -0.18237   | -0.02999   | 8.560869   | 3.858919   | 0.865887   |
| 0           | 0           | 0           | 0           | 0          | 0          | 0          | 0          | 0          |
| 0.503       | 1.581493    | 0.242441    | 1.95363     | 1.708858   | -0.8313    | -1.11501   | 0.973803   | -0.75323   |
| 0.825323    | -0.97623    | 0.546139    | 5.094646    | 2.33662    | -0.64458   | 5.106773   | 1.510977   | -0.02323   |
| -0.2746     | -3.06705    | -0.68777    | 5.509991    | 1.760544   | 0.108194   | 6.552444   | 0.550056   | 1.780815   |
| 0.923044    | -0.21567    | 0.841986    | 4.158083    | 0.802757   | -1.59126   | 7.171038   | -0.55769   | -0.83426   |
| -0.05074    | 0.215391    | 0.294884    | 3.36586     | 1.987726   | 0.85083    | 0.003914   | 0.891939   | 0.620514   |
| 0.144218    | 0.53273     | 0.428709    | 4.846956    | 1.821552   | 1.91284    | 0.343115   | -1.08555   | -0.86326   |
| -0.15539    | -2.1222     | 0.669291    | 7.603731    | 4.553307   | 1.643305   | 9.058363   | 2.464266   | 3.472616   |
| -0.0265     | 0.78301     | 1.389853    | 7.342264    | 4.098963   | 2.18693    | 3.716837   | 2.465879   | 1.467045   |
| 0.675835    | -1.45305    | 1.160282    | 9.12921     | 5.280737   | 2.423498   | 8.602314   | -0.29382   | 3.455431   |
| -0.51528    | -0.95635    | -0.15774    | 1.345095    | 0.598221   | 0.683889   | -1.82019   | -0.31513   | -0.49298   |
| -0.12326    | -1.3142     | 0.920788    | 4.607075    | 2.663584   | 2.94463    | 7.646662   | 1.923384   | 1.570236   |
| 1.705194    | 0.295151    | 0.906168    | 1.476109    | 1.337181   | 1.041546   | 0.393705   | 0.660191   | 1.182291   |
| 0.962639    | 0.63187     | 0.769381    | 6.717472    | 1.218348   | 2.801851   | 5.981428   | 1.392641   | -1.85342   |
| 0           | 0           | 0           | 0           | 0          | 0          | 0          | 0          | 0          |
| 0.048599    | -0.05196    | -0.34395    | 0.785397    | 1.272167   | 2.050352   | -0.41254   | 0.114439   | 0.73488    |
| -1.53289    | -3.10555    | -0.97256    | 6.550749    | 3.716082   | 0.750803   | 7.229824   | 0.557978   | -0.77261   |
| -0.08363    | -0.84114    | 0.380824    | 4.165033    | 2.741943   | -1.80658   | 5.202973   | -0.09021   | -0.49175   |
| -0.57539    | -2.81593    | -0.26935    | 5.336552    | 3.373051   | -0.19267   | 6.93678    | -0.43377   | -1.5122    |
| -1.07965    | -0.04783    | -0.28773    | -0.28484    | 0.069815   | 0.225626   | -0.12383   | -0.23991   | 0.555232   |
| -0.13448    | -0.41194    | -0.80418    | -1.65012    | -0.2707    | -0.62355   | -0.26962   | -0.00699   | -0.39415   |
| -0.68535    | -1.51392    | -0.11477    | 2.041159    | 1.418716   | -0.62462   | 6.352029   | -0.32967   | -0.82481   |
| 0.000823    | -0.46819    | 0.504619    | 3.12553     | 4.105886   | -0.97347   | 7.062757   | -0.25216   | 0.043351   |
| -0.38754    | -3.06754    | -0.16924    | 2.230228    | 5.088167   | -2.7119    | 8.48767    | 0.192434   | 1.640121   |
| -0.12952    | -1.58958    | -0.48182    | 7.018087    | 5.665831   | 2.967979   | 10.22461   | -0.08269   | 3.976336   |
| -1.15953    | -3.05753    | -1.28814    | 0.433176    | 2.695938   | -2.09249   | 6.664779   | -0.94958   | -1.38082   |
| -0.44466    | -2.4424     | -0.3662     | 3.066576    | 3.092417   | -1.12948   | 4.403232   | -0.5286    | -1.55947   |
| -0.38379    | -1.84776    | -0.08579    | 4.721973    | 4.871653   | -1.55375   | 7.294583   | -0.05372   | 0.734393   |
| -0.10475    | 0.551761    | 0.389134    | 0.49971     | 4.165392   | -1.06024   | -0.42652   | 0.048973   | -0.09304   |
| -0.21279    | 0.699521    | 0.235269    | 1.22068     | 2.415421   | -1.7237    | -0.07362   | 0.480299   | -0.17039   |
| 0.350476    | -2.2771     | 0.746257    | 4.969149    | 4.579374   | 1.020784   | 10.48785   | 0.101147   | 0.82277    |
| 0.716058    | -0.35904    | 0.422439    | 3.477304    | 1.834843   | 0.929445   | 6.350297   | 0.836262   | 0.229877   |
| 0.180354    | -0.45637    | 0.386575    | 5.411156    | 4.294973   | 0.278849   | 7.649146   | 0.325243   | -0.57246   |
| 0.134477    | 0.411937    | 0.804175    | 1.650122    | 0.270699   | 0.623549   | 0.269622   | 0.006992   | 0.394151   |

| Liver_OAS2 | Liver_OAS1 | Liver_OAS3 | Liver_FOS | Liver_MX1 | Liver_IL18 | Liver_IRF1 | Liver_IRF7 | Liver_IRF8 |
|------------|------------|------------|-----------|-----------|------------|------------|------------|------------|
| 0.263638   | -0.05541   | 2.189655   | -3.76981  | -0.38907  | 0.618977   | 0.428713   | 0.20355    | 0.087296   |
| 0.55526    | 1.061731   | 2.250204   | -2.13139  | 1.556696  | 0.026621   | 0.504925   | 0.440355   | 0.657644   |
| 0.406752   | -0.02647   | 0.933704   | -2.68115  | 0.351242  | 0.227467   | 0.201773   | 0.047907   | 0.512527   |
| -0.38584   | -0.88198   | 0.84864    | -3.23645  | -0.83873  | 0.122622   | 0.236923   | 0.155525   | 0.242025   |
| 0.461632   | 1.156136   | 2.609543   | -5.6049   | 0.326237  | 0.752586   | -0.10711   | 0.801764   | 1.001278   |
| 0.654112   | 0.212114   | 1.228096   | -7.09229  | 1.002728  | -2.29422   | -0.54348   | 0.717768   | 1.029026   |
| 0          | 0          | 0          | 0         | 0         | 0          | 0          | 0          | 0          |
| -1.09322   | 0.995171   | -0.34607   | -5.63383  | -1.16491  | 0.167553   | -0.03281   | -0.22746   | -0.05546   |
| 0.399714   | -0.03307   | 1.751421   | -6.94519  | -0.06686  | -2.49978   | -1.38012   | -0.44402   | -0.03449   |
| -0.67801   | -0.86408   | 1.755795   | -7.42485  | 2.388548  | -2.51131   | -0.14664   | 0.449669   | 1.392389   |
| -2.95863   | 0.03278    | 2.815296   | -8.82858  | 0.336687  | -3.23633   | -1.37411   | -0.57808   | -0.67436   |
| 0.383776   | -0.08679   | -1.85488   | 1.913801  | 2.649532  | 1.203314   | 1.437572   | 1.694626   | 1.152765   |
| 1.254869   | 0.471539   | 1.279982   | 3.70846   | 2.633097  | 1.554155   | 1.229675   | 1.282055   | 1.814585   |
| 2.684561   | 3.132298   | 1.615671   | 2.895691  | 6.196445  | -0.84164   | 2.595547   | 1.756008   | 3.797964   |
| 3.441557   | 2.982155   | 2.383125   | 2.972982  | 3.043047  | 0.059507   | 1.478048   | 3.235502   | 0.478674   |
| 3.911779   | 3.228922   | 3.517769   | 4.157698  | 7.487839  | -0.03062   | 1.298847   | 2.959263   | 5.418222   |
| -1.85107   | -1.6046    | -1.08947   | -0.68664  | 1.607481  | -0.83149   | -0.13695   | 0.516047   | 2.460382   |
| 1.629677   | 2.753458   | 2.84947    | 2.377207  | 3.272242  | -1.92571   | 1.076981   | 1.37785    | 3.300781   |
| -1.58373   | 1.439886   | -0.00628   | 0.056389  | 1.243088  | 0.468941   | 0.03779    | 1.674004   | 2.036499   |
| 1.177998   | -0.90393   | -0.44821   | 5.052406  | -0.77249  | -1.12013   | -0.38505   | -1.6755    | 0.89826    |
| 0          | 0          | 0          | 0         | 0         | 0          | 0          | 0          | 0          |
| -0.50718   | -0.3661    | -1.34338   | 0.982243  | 1.672279  | 0.174484   | 0.477631   | 1.162279   | 1.139967   |
| -1.12042   | 1.200552   | 1.056467   | 1.033823  | 0.818048  | -2.54311   | 0.316986   | 0.584867   | 1.177933   |
| 0.175931   | 1.392542   | 2.365132   | 1.643565  | 0.229054  | -1.83582   | -0.87153   | 0.638165   | 0.355429   |
| -0.65134   | 0.621187   | 1.27476    | 0.40805   | -0.1777   | -3.49022   | -1.23038   | 0.27061    | 0.257524   |
| -1.05671   | -0.23248   | -0.50122   | 1.955228  | 0.393567  | -0.63619   | -1.12189   | 0.227269   | -0.03161   |
| -0.132     | -0.2062    | -0.50521   | -0.53134  | 0.055879  | -0.24563   | -0.0521    | -0.12818   | -0.73134   |
| -0.17231   | 0.980799   | 1.385676   | -0.21216  | 0.090009  | -2.33828   | -1.50319   | 0.25426    | 0.007425   |
| 0.8474     | 1.633303   | 2.527806   | 1.519811  | 0.395127  | -1.40647   | -0.68341   | 0.57368    | 0.009327   |
| 1.336131   | 2.438147   | 3.590957   | 1.357493  | 3.275487  | -2.35629   | -0.1309    | 0.789775   | 1.412634   |
| 1.476232   | 1.732159   | 3.052238   | 2.928842  | 6.174495  | -1.82975   | 0.760052   | 0.265626   | 2.325821   |
| -0.85074   | 0.254047   | 0.88403    | -0.3265   | -0.79827  | -2.68772   | -1.90343   | -0.71905   | 0.095993   |
| -1.13937   | 0.029556   | 0.214923   | -0.71539  | -0.36822  | -2.51198   | -1.58844   | -0.07696   | -0.68338   |
| 0.881007   | 1.875128   | 3.142478   | 1.060994  | 2.862903  | -1.78495   | -0.18832   | 1.000504   | 1.859867   |
| 0.795737   | 0.576372   | 1.623467   | 1.060023  | 0.53095   | 0.663541   | 0.401077   | 0.92266    | 1.187653   |
| -0.30894   | 0.458679   | -0.82501   | -0.07677  | 0.605592  | 0.012803   | 0.35511    | 0.44106    | -0.29351   |
| 1.075198   | 1.794348   | 2.641883   | 2.727439  | 2.37485   | -1.71926   | 0.225615   | 0.801641   | 2.414667   |
| 0.759057   | 1.767649   | 2.485824   | 0.621421  | 1.27192   | -1.73858   | -0.00817   | 1.225448   | 0.99246    |
| 0.122937   | 1.009657   | 1.889344   | 0.310513  | 0.633729  | -2.00494   | -0.61207   | 0.631692   | 0.034807   |
| 0.132001   | 0.206196   | 0.505214   | 0.531341  | -0.05588  | 0.245633   | 0.052095   | 0.128184   | 0.731344   |

| Liver_CXCL | Liver_CXCL | Liver_IFIH1 | Liver_DDX <sup>E</sup> | Liver_KLF2 | Liver_HNF1 |
|------------|------------|-------------|------------------------|------------|------------|
| -1.36317   | 0.95731    | 0.493565    | 0.308855               | -0.13679   | 0.080507   |
| 0.041475   | 1.577154   | 0.533447    | 0.490557               | -0.18397   | 0.33322    |
| -0.03035   | 0.667221   | 0.433825    | 0.903616               | 1.777164   | 0.365881   |
| -0.54302   | 0.633476   | 0.283134    | 0.101345               | -0.43969   | -0.34381   |
| -0.46115   | 1.450491   | 0.866093    | 1.004646               | 1.122276   | 0.592606   |
| 3.738552   | 7.065247   | -0.90606    | -0.88185               | 0.873407   | -0.13396   |
| 0          | 0          | 0           | 0                      | 0          | 0          |
| 0.401836   | -0.26968   | -0.11662    | 0.183739               | -0.04109   | -0.2346    |
| 2.021235   | 4.49819    | -1.76628    | -1.39098               | -0.41855   | -0.68668   |
| 4.091976   | 6.609978   | -0.88219    | -1.3539                | 3.355675   | -0.65572   |
| 1.934416   | 5.943825   | -1.72341    | -1.56607               | 1.573938   | -1.50224   |
|            | -1.2644    | -0.04898    | -0.21921               | 1.710983   | 1.357626   |
| 3.159487   | 0.033834   | -0.00281    | 0.361795               | 1.526342   | 0.733961   |
| 8.449066   | 8.933098   | 0.514673    | 0.18961                | 2.018227   | 0.872683   |
| 4.861778   | 6.590187   | -0.39037    | 0.553297               | 1.25835    | 1.07439    |
| 11.13791   | 8.969803   | 0.700928    | -0.13718               | 3.248339   | 1.116924   |
| 2.374268   | -0.83018   | -0.21305    | -0.69618               | -1.63671   | -0.69147   |
| 7.964956   | 6.785204   | -0.86966    | -0.7119                | 1.812347   | 0.801331   |
| 3.246798   | 5.739449   | 0.220364    | 0.396957               | 0.447346   | 0.340843   |
| 3.179937   | 0.697405   | -1.23088    | -0.689                 | 0.658049   | 0.253586   |
| 0          | 0          | 0           | 0                      | 0          | 0          |
| 0.312546   | -0.74778   | 0.029316    | 0.099384               | -0.00834   | 1.070303   |
| 6.362776   | 5.742056   | -2.02203    | -2.01428               | 0.068415   | 0.443659   |
| 3.360962   | 7.028597   | -0.75185    | -0.17036               | -0.00402   | -0.61358   |
| 3.601076   | 7.075659   | -1.5734     | -0.71452               | 0.037589   | -0.38415   |
| 1.80909    | -0.59017   | -0.27417    | 0.715085               | 0.233699   | 0.369961   |
| 0.179132   | -1.03304   | -0.09097    | -0.77987               | -1.18731   | -0.66865   |
| 3.093073   | 5.337986   | -1.19285    | -1.38284               | 0.703225   | -1.8714    |
| 4.215965   | 5.568108   | -0.99617    | -0.57017               | 0.794822   | -0.48407   |
| 5.256285   | 6.661079   | -0.09453    | -0.92314               | 1.202609   | -1.24349   |
| 8.724308   | 9.062132   | 0.6536      | 1.219142               | 3.006494   | -2.15382   |
| 3.624567   | 5.884689   | -1.65023    | -1.54404               | 0.247867   | -0.81222   |
| 1.9643     | 5.658554   | -0.93416    | -1.3366                | -0.33811   | -1.3996    |
| 4.794151   | 5.966402   | -0.70274    | -0.74988               | 0.805102   | -0.58692   |
| 1.223915   | 1.16453    | 0.351409    | 0.802518               | 0.200927   | 0.367935   |
| 1.401865   | 0.1637     | 0.446347    | -0.48024               | -1.54806   | -0.23161   |
| 7.000698   | 7.244959   | -0.25274    | -0.35166               | 1.792283   | 0.621481   |
| 4.316435   | 6.444992   | -0.14921    | 0.614669               | -0.03131   | -0.03227   |
| 3.770933   | 6.217987   | -0.76416    | -0.35832               | 0.064776   | 0.040079   |
| -0.17913   | 1.033035   | 0.09097     | 0.779868               | 1.18731    | 0.66865    |
